# Supplementary material for: Genome-wide DNA methylation analysis revealed epigenetic mechanism underlying end stage renal disease
Source: Research Square preprint supplement (doi:10.21203/rs.3.rs-7071877/v1), 2025-07-22
Supplement: Supplementary file 1 [file f74a54cd0e401e4cc864a84b.xlsx]

## Sheet: Supplementary Table 1
Supplementary Table 1a. Basic characteristics of study participants in the discovery cohort ( GDPH: n=998 ).
ESRD group1	ESRD cases										Controls3
	DKD-ESRD		PKD-ESRD		IgAN-ESRD		HKD-ESRD		LN-ESRD
Variables2	mean( ± SD)/count (percentage)	P value4	mean( ± SD)/count (percentage)	P value4	mean( ± SD)/count (percentage)	P value4	mean( ± SD)/count (percentage)	P value4	mean( ± SD)/count (percentage)	P value4	mean( ± SD)/count (percentage)
baseline
Subjects numbers	n=342	-	n=165	-	n=144	-	n=81	-	n=70	-	n=196
Male,n (%)	235 (68.71)	0.0019	87 (52.73)	0.2514	92 (63.89)	0.0299	56 (69.14)	0.0276	12 (17.14)	0.0108	82 (41.84)
Age,years	61.52 ± 11.66	<0.0001	53.68 ± 10.72	<0.0001	39.90 ± 12.28	0.0671	59.16 ± 14.43	<0.0001	41.33 ± 12.10	0.4838	42.77 ± 15.57
Current smokers, n (%)	66 (19.30)	0.1243	26 (15.76)	0.5775	22 (15.28)	0.6736	7 (8.64)	0.5045	7 (10.00)	0.7426	25 (12.76)
Estimated cell type proportions
CD8+ T cell, %	3.41 ± 2.92	<0.0001	3.18 ± 3.09	<0.0001	5.20 ± 3.69	0.4973	2.79 ± 2.33	<0.0001	5.51 ± 4.01	0.293	4.94 ± 3.45
CD4+ T cell, %	4.42 ± 3.92	<0.0001	5.56 ± 4.77	0.1152	6.61 ± 4.85	0.6478	3.79 ± 3.68	<0.0001	2.74 ± 4.22	<0.0001	6.37 ± 4.89
NK cell, %	4.75 ± 3.94	0.2252	4.45 ± 3.44	0.06369	4.31 ± 4.16	0.05408	4.75 ± 3.94	0.3912	3.44 ± 3.05	0.0003	5.21 ± 4.34
B cell, %	0.71 ± 1.14	<0.0001	0.48 ± 1.29	<0.0001	1.33 ± 1.80	0.1346	0.58 ± 1.21	<0.0001	0.53 ± 1.12	<0.0001	1.65 ± 2.12
Monocyte, %	8,47 ± 2.64	0.4982	8.64 ± 2.59	0.226	8.42 ± 2.53	0.6857	8.66 ± 2.66	0.3113	8.69 ± 3.47	0.3973	8.31 ± 2.63
Neutrophil, %	78.07 ± 7.85	<0.0001	77.53 ± 8.50	<0.0001	74.05 ± 9.03	0.5776	79.34 ± 7.62	<0.0001	79.09 ± 9.57	<0.0001	73.48 ± 9.41
Eosinophil, %	0.17 ± 1.28	0.1369	0.15 ± 1.20	0.3007	0.07 ± 0.90	0.7357	0.10 ± 0.87	0.6307	0.00 ± 0.02	0.3062	0.05 ± 0.59
Supplementary Table 1b. Basic characteristics of study participants in validation cohort ( KTPH: n=737 ).
Variables	ESRD cases	Controls	P value4
baseline
Subjects numbers	n=229	n=508	-
Male,n (%)	153 (66.81)	284 (55.91)	0.1841
Age, years	61.23 ± 9.94	57.68 ± 10.36	<0.0001
Current smokers, n (%)	69 (30.13)	102 (20.08)	0.0252
Estimated cell type proportions
CD8+ T cell, %	2.98 ± 3.61	4.90 ± 3.85	<0.0001
CD4+ T cell, %	4.32 ± 4.01	8.76 ± 5.00	<0.0001
NK cell, %	3.99 ± 3.95	7.93 ± 5.17	<0.0001
B cell, %	1.04 ± 1.25	2.75 ± 2.39	<0.0001
Monocyte, %	8.08 ± 3.35	7.72 ± 2.20	0.1374
Neutrophil, %	79.07 ± 11.13	67.90 ± 9.91	<0.0001
Eosinophil, %	0.51 ± 2.89	0.05 ± 0.61	0.01667
1.GDPH cohort: Guangdong Provincial People's Hospital cohort; KTPH cohort: Khoo Teck Puat Hospital cohort; ESRD: End stage renal disease;DKD: diabetic nephropathy; PKD:polycystic kidney disease; IgAN: IgA nephropathy; HKD:hypertensive kidney disease; LN:lupus nephropathy. NK cell natural killer cell.
2. Values are calculated as mean ± SD.
3. The control group in GDPH cohort for different ESRD etiologies is derived from the same sample batch, with a total of 196 subjects enrolled.
4. P values were calculated using two-tailed t-tests for continuous variables and Chi-square tests for categorical variables.

## Sheet: Supplementary Table 2
Supplementary Table 2. Differentially methylated CpG sites associated with ESRD resulting from distinct primary diseases in GDPH cohort.
CpG	Chr	Position(hg19)	Strand	Nearest Gene1	Relation_to_Gene	β	SE	P-value
LN-ESRD2 (cases = 70, controls = 196)
cg01485645	17	36862199	R	MLLT6	Body	-8.08	1.35	2.02e-09
cg03964851	5	93905427	R	MIR1974;C5orf36	TSS200;5'UTR	6.8	1.17	6.38e-09
cg16581032	8	47742015	R	-	-	-6.41	1.02	2.83e-10
cg17944885	19	12225735	R	-	-	2	0.34	5.12e-09
DKD-ESRD3 (cases = 342, controls = 196)
cg00539226	17	48498045	R	-	-	3.14	0.54	5.83e-09
cg01485645	17	36862199	R	MLLT6	Body	-6.17	0.76	3.41e-16
cg02378763	9	134363027	R	PRRC2B	Body	-8.08	1.26	1.27e-10
cg03964851	5	93905427	R	MIR1974;C5orf36	TSS200;5'UTR	4.84	0.66	2.4e-13
cg05098339	11	62378423	R	EML3	Body	-5.28	0.89	2.82e-09
cg07596174	20	55926107	F	RAE1	TSS1500;TSS200	-6.22	1.05	3.04e-09
cg08676905	10	6019609	F	IL15RA	TSS200;5'UTR	4.04	0.5	7.71e-16
cg09076584	17	26941253	R	FLJ25006	TSS200	-4.25	0.71	2.08e-09
cg09859416	12	34262100	F	-	-	-7.01	1.19	3.9e-09
cg10002435	17	79577359	R	NPLOC4	Body	-4.96	0.77	1.58e-10
cg10160612	16	30751899	F	-	-	-5.99	1.05	1.13e-08
cg11176393	19	4568101	R	-	-	-7.22	1.24	5.43e-09
cg12137220	17	19220813	R	EPN2	Body	-4.58	0.79	8.1e-09
cg12491225	1	6156227	R	KCB2	Body	-7.88	1.37	8.78e-09
cg12973487	19	1623075	F	TCF3	Body	-3.63	0.62	6.12e-09
cg13241457	16	29758360	R	C16orf54	TSS1500	5.79	0.96	1.86e-09
cg15035424	10	978965	R	LARP4B;LOC101927762	TSS1500;Body	-3.35	0.56	1.77e-09
cg16581032	8	47742015	R	-	-	-5.07	0.55	2.05e-20
cg16980393	10	6438364	R	-	-	3.1	0.54	9.07e-09
cg17944885	19	12225735	R	-	-	1.72	0.22	2.66e-15
cg19078280	10	978971	R	LARP4B;LOC101927762	TSS1500;Body	-3.52	0.57	5.05e-10
cg19191888	8	144901936	F	PUF60	Body	-3.91	0.58	1.1e-11
cg20544516	17	17717183	F	MIR33B;SREBF1	Body	-5.05	0.85	2.93e-09
cg25463483	6	30530544	R	PRR3	3'UTR	-5.77	1.01	1.16e-08
cg25544931	19	12097624	F	-	-	1.51	0.25	8.36e-10
cg25752677	16	56309206	R	GO1	Body	2.35	0.4	3.36e-09
cg26094004	17	42075116	F	PYY	5'UTR	-4.34	0.54	7.22e-16
cg26098679	1	23681008	R	-	-	3.16	0.52	1.26e-09
IgAN-ESRD4 (cases = 144, controls = 196)
cg00435244	8	117125735	F	LINC00536	Body	5.01	0.79	2.69e-10
cg00802237	14	94858066	R	SERPI1	TSS1500	5.29	0.85	4.16e-10
cg00829404	1	61362869	R	-	-	3	0.5	1.62e-09
cg00898064	3	38029323	F	-	-	4.11	0.65	1.9e-10
cg01485645	17	36862199	R	MLLT6	Body	-6.41	0.86	7.72e-14
cg01906801	17	38191472	R	MED24	Body	-5.43	0.92	3.65e-09
cg02099683	10	126386947	R	FAM53B	Body	3.42	0.59	8.32e-09
cg02157636	11	68476835	F	MTL5	Body	5.03	0.86	4.45e-09
cg03964851	5	93905427	R	MIR1974;C5orf36	TSS200;5'UTR	5.65	0.76	1.29e-13
cg04591628	11	120100875	R	-	-	-5.72	0.98	6.36e-09
cg04816311	7	1066650	F	C7orf50	Body	-4.43	0.68	6.25e-11
cg04924454	7	26327799	F	-	-	3.52	0.58	1.55e-09
cg07514306	7	129934352	R	CPA4	Body	2.57	0.41	5.11e-10
cg07840258	9	130269866	R	FAM129B	Body	-6.54	1.07	9.44e-10
cg08409361	10	105311356	F	NEURL	Body	2.95	0.51	6.36e-09
cg08676905	10	6019609	F	IL15RA	TSS200;5'UTR	5.02	0.61	2.76e-16
cg08851393	5	134565560	R	C5orf66	5'UTR	4.41	0.75	4.55e-09
cg09010791	11	72448539	F	ARAP1	5'UTR	5.15	0.85	1.18e-09
cg09019636	2	62964766	F	EHBP1	Body	3.83	0.66	5.26e-09
cg09299075	10	76154015	F	ADK	Body	3.05	0.52	4.1e-09
cg09828520	12	58169646	R	METTL21B	Body	-8.48	1.46	6.33e-09
cg10072464	13	114064536	F	-	-	2.53	0.42	2.46e-09
cg10472537	2	105348800	R	-	-	6.58	0.95	4.79e-12
cg10780074	3	4365061	F	-	-	3.31	0.56	3.74e-09
cg11544657	1	9968130	R	CTNNBIP1	5'UTR	4.73	0.74	1.78e-10
cg11787791	1	153329460	F	S100A9	TSS1500	4.16	0.65	1.15e-10
cg12654199	17	78753826	F	RPTOR	Body	5.98	0.98	1.22e-09
cg13241457	16	29758360	R	C16orf54	TSS1500	6.28	1.03	9.56e-10
cg13641778	3	52879742	F	TMEM110	Body	5.25	0.9	5.46e-09
cg13854688	3	43821635	R	-	-	6.57	1.02	1e-10
cg15251675	6	41593339	R	-	-	3.12	0.52	1.8e-09
cg15255263	7	101574416	R	CUX1	Body	3.15	0.49	9.63e-11
cg15616998	1	40435396	R	MFSD2A	3'UTR	4.38	0.75	5.78e-09
cg16014412	1	9687471	F	-	-	-4.18	0.72	6.28e-09
cg16085056	5	99381964	F	-	-	5.79	0.9	1.26e-10
cg16307793	1	108678738	R	SLC25A24	3'UTR	4.12	0.69	2.12e-09
cg16536560	8	68341055	F	CPA6	Body	1.97	0.34	6e-09
cg16581032	8	47742015	R	-	-	-5.06	0.6	4.7e-17
cg16980393	10	6438364	R	-	-	3.56	0.6	3.82e-09
cg17124293	10	45403981	R	-	-	2.81	0.49	7.72e-09
cg17667988	19	797342	R	PTBP1	TSS200	-3.76	0.64	3.33e-09
cg17944885	19	12225735	R	-	-	1.82	0.23	6.19e-15
cg19191888	8	144901936	F	PUF60	Body	-3.53	0.58	1.29e-09
cg19526450	5	142254301	F	ARHGAP26	Body	5.14	0.84	7.84e-10
cg21961721	1	153751330	R	SLC27A3	Body	3.33	0.55	1.48e-09
cg22240998	3	4736799	F	ITPR1	Body	1.82	0.3	7.75e-10
cg22386583	17	78753756	R	RPTOR	Body	4.95	0.77	1.56e-10
cg23428597	13	30983495	R	-	-	3.42	0.59	8.32e-09
cg23955402	18	12371	F	-	-	-3.79	0.66	7.86e-09
cg24348980	1	232073393	R	DISC1-IT1;DISC1;TSX-DISC1	Body	3.15	0.51	5.63e-10
cg25544931	19	12097624	F	-	-	2.25	0.31	2.19e-13
cg26094004	17	42075116	F	PYY	5'UTR	-4.01	0.6	2.86e-11
cg26171235	10	105311691	R	NEURL1	Body	5.13	0.76	1.75e-11
cg26234885	7	100029046	R	MEPCE	1stExon	4.01	0.69	5.61e-09
cg26245643	12	54798513	R	ITGA5;LOC102724050	Body	-8.86	1.4	2.28e-10
cg27410726	6	166900781	F	RPS6KA2	Body	3.18	0.5	1.62e-10
HKD-ESRD5 (cases = 81, controls = 196)
cg01485645	17	36862199	R	MLLT6	Body	-6.68	1.14	5.06e-09
cg02378763	9	134363027	R	PRRC2B	Body	-13.9	2.32	1.96e-09
cg04591628	11	120100875	R	-	-	-11.8	1.94	1.08e-09
cg07514306	7	129934352	R	CPA4	Body	4.99	0.78	1.78e-10
cg08676905	10	6019609	F	IL15RA	TSS200;5'UTR	3.76	0.66	1.11e-08
cg11544657	1	9968130	R	CTNNBIP1	5'UTR	6.48	1.09	2.82e-09
cg13241457	16	29758360	R	C16orf54	TSS1500	8.73	1.51	7.87e-09
cg16581032	8	47742015	R	-	-	-5.05	0.78	1.08e-10
cg17944885	19	12225735	R	-	-	2.77	0.42	5.29e-11
cg24348980	1	232073393	R	DISC1-IT1;DISC1;TSX-DISC1	Body	4.34	0.72	1.68e-09
cg25544931	19	12097624	F	-	-	2.77	0.44	3.94e-10
cg25752677	16	56309206	R	GO1	Body	4.9	0.79	6.29e-10
PKD-ESRD6 (cases = 165, controls = 196)
cg00037671	20	4070556	F	-	-	4.68	0.81	8.14e-09
cg00435244	8	117125735	F	LINC00536	Body	5.8	0.96	1.26e-09
cg00802237	14	94858066	R	SERPI1	TSS1500	5.68	0.96	2.74e-09
cg00829404	1	61362869	R	-	-	3.32	0.58	1.14e-08
cg01485645	17	36862199	R	MLLT6	Body	-6.5	0.94	5.75e-12
cg01906801	17	38191472	R	MED24	Body	-6.34	1.1	7.86e-09
cg02157636	11	68476835	F	MTL5	Body	6.53	1.03	2.54e-10
cg02317642	2	74278330	R	TET3	Body	5.72	0.94	1.38e-09
cg02378763	9	134363027	R	PRRC2B	Body	-9.75	1.61	1.51e-09
cg02913882	3	177196501	R	-	-	4.49	0.74	1.06e-09
cg03964851	5	93905427	R	MIR1974;C5orf36	TSS200;5'UTR	5.01	0.79	2.24e-10
cg04591628	11	120100875	R	-	-	-7.84	1.28	1.03e-09
cg04816311	7	1066650	F	C7orf50	Body	-4.6	0.75	6.92e-10
cg06123913	17	3707356	F	-	-	3.7	0.64	6.24e-09
cg06158227	15	43662311	R	TUBGCP4;ZSCAN29	TSS1500;TSS200	3.31	0.54	7.36e-10
cg07054804	11	10621492	R	MRVI1	Body	4.97	0.85	4.04e-09
cg07514306	7	129934352	R	CPA4	Body	3.39	0.52	4.81e-11
cg08427067	11	95015466	R	-	-	4.83	0.81	2.68e-09
cg08448594	18	57524736	R	-	-	3.08	0.5	1.02e-09
cg08676905	10	6019609	F	IL15RA	TSS200;5'UTR	3.87	0.57	1.18e-11
cg08851393	5	134565560	R	C5orf66	5'UTR	4.81	0.82	5.03e-09
cg09299075	10	76154015	F	ADK	Body	3.77	0.6	4.25e-10
cg09583374	12	54809239	F	ITGA5	Body	4.46	0.78	1.01e-08
cg09799668	10	77013564	R	-	-	3.1	0.53	3.89e-09
cg10160612	16	30751899	F	-	-	-7.74	1.34	7.39e-09
cg10256405	2	105374275	F	LINC01114	TSS200	5.29	0.91	6.39e-09
cg10614054	1	54801682	R	SSBP3	Body	4.55	0.76	1.96e-09
cg10958823	11	17192278	R	PIK3C2A	TSS1500	4.9	0.82	2.59e-09
cg11544657	1	9968130	R	CTNNBIP1	5'UTR	5.41	0.88	7.19e-10
cg11751964	19	2905983	R	ZNF57	Body	1.45	0.25	8.92e-09
cg11787791	1	153329460	F	S100A9	TSS1500	4.07	0.69	4.07e-09
cg12230203	20	48242474	R	-	-	2.04	0.35	6.51e-09
cg12954441	16	84121218	F	MBTPS1	Body	-5.47	0.94	6.84e-09
cg13241457	16	29758360	R	C16orf54	TSS1500	7.46	1.17	2.12e-10
cg13641778	3	52879742	F	TMEM110	Body	6.34	1.08	3.89e-09
cg13824500	10	114394236	R	VTI1A	Body	2.32	0.38	1.62e-09
cg13854688	3	43821635	R	-	-	7.05	1.13	4.43e-10
cg13924998	7	41531155	R	-	-	6.7	1.03	8.61e-11
cg14815565	10	97501744	F	ENTPD1	Body	5	0.83	2.02e-09
cg15251675	6	41593339	R	-	-	3.17	0.55	7.5e-09
cg15255263	7	101574416	R	CUX1	Body	3.47	0.57	1.19e-09
cg15685198	2	135163836	R	MGAT5	Body	3.38	0.56	1.54e-09
cg16581032	8	47742015	R	-	-	-5.99	0.79	3.65e-14
cg16854275	8	28196246	F	PNOC	1stExon;5'UTR;Body	4.3	0.7	9.57e-10
cg17025698	17	27233965	R	PHF12	Body	-4.75	0.77	6.1e-10
cg17944885	19	12225735	R	-	-	2.39	0.32	6.08e-14
cg18019618	5	72964090	R	ARHGEF28	5'UTR	4.34	0.75	6.31e-09
cg19191888	8	144901936	F	PUF60	Body	-4.31	0.72	2.62e-09
cg19501902	3	111268051	F	CD96	Body	4.01	0.68	3.89e-09
cg20587151	11	44730975	R	-	-	2.49	0.43	6.37e-09
cg21961721	1	153751330	R	SLC27A3	Body	3.81	0.64	2.19e-09
cg22386583	17	78753756	R	RPTOR	Body	4.6	0.8	9.19e-09
cg22675970	11	62563573	R	NXF1	3'UTR;Body	-6.59	1.11	2.85e-09
cg23177739	10	71087364	F	HK1	Body	3.83	0.67	1.08e-08
cg24334029	20	58296208	F	PHACTR3	TSS200;Body	4.78	0.8	2.38e-09
cg24348980	1	232073393	R	DISC1-IT1;DISC1;TSX-DISC1	Body	3.38	0.56	1.54e-09
cg24799186	8	103789208	R	-	-	4.59	0.76	1.42e-09
cg25371251	11	68483493	F	MTL5	Body	2.66	0.44	1.47e-09
cg25544931	19	12097624	F	-	-	2.14	0.32	1.8e-11
cg25752677	16	56309206	R	GO1	Body	3.55	0.56	2.24e-10
cg26094004	17	42075116	F	PYY	5'UTR	-4.65	0.69	1.73e-11
cg26098679	1	23681008	R	-	-	4.32	0.7	8.01e-10
cg26171235	10	105311691	R	NEURL1	Body	5.63	0.85	2.67e-11
cg26563141	2	88124876	R	RGPD2;RGPD1	Body	-5.33	0.86	4.9e-10
cg26701500	20	36024614	F	SRC	Body	-8.45	1.43	3.25e-09
cg27373246	12	129336752	F	GLT1D1	TSS1500	3.93	0.66	2.45e-09
cg27410726	6	166900781	F	RPS6KA2	Body	3.86	0.59	7.38e-11
Statistical significance defined as P<1.3e-8 (0.05 divided by 774,631 autosomal CpG sites and 5 primary diseases, corrected for multiple testing)
1. The nearest gene was defined as the gene containing the CpG site within its gene body or within 1,500 bp upstream or downstream of its transcription start site (TSS).
2. LN-ESRD: End stage kidney disease (ESRD) caused by lupus nephritis
3. DKD-ESRD: ESRD caused by diabetic kidney disease
4. IgAN-ESRD: ESRD caused by IgA nephropathy
5. HKD-ESRD: ESRD caused by hypertensive kidney disease
6. PKD-ESRD: ESRD caused by polycystic kidney disease
The same controls (n = 196) were shared across the different ESRD groups.

## Sheet: Supplementary Table 3
Supplementary Table 3. Differentially methylated CpG sites with methylation levels significantly associated with ESRD resulting from distinct primary kidney diseases : discoveried in the GDPH cohort and validated in the KTPH cohort
CpG	CHR1	Position(hg19)	Strand	Nearest Gene2	Relation to gene	GDPH dicovery cohort																			KTPH validation cohort
						DKD-ESRD(n=538)			LN-ESRD(n=266)			IgAN-ESRD(n=340)			PKD-ESRD(n=361)			HKD-ESRD(n=277)			heterogeneity4				estimate	se	p value
						estimate	se3	p value	estimate	se	p value	estimate	se	p value	estimate	se	p value	estimate	se	p value	I_squared	Q	p value
cg00037671	20	4070556	F	-	-	2.84	0.59	1.3e-06	3.26	0.95	0.00059	3.53	0.72	9.5e-07	4.68	0.81	8.14e-09	3.29	0.87	0.000171	0	3.4586	0.484201		2.93545	0.525962	2.38987e-08
cg00435244	8	117125735	F	LINC00536	Body	3.94	0.72	3.97e-08	4.44	1.03	1.53e-05	5.01	0.79	2.69e-10	5.8	0.96	1.26e-09	6.73	1.22	3.93e-08	21.9363	5.12402	0.274807		3.16572	0.516222	8.65186e-10
cg00802237	14	94858066	R	SERPINA1	TSS1500	2.87	0.63	5.61e-06	4.13	1.12	0.000214	5.29	0.85	4.16e-10	5.68	0.96	2.74e-09	4.69	1.06	9.54e-06	53.983	8.69245	0.0692637		4.61303	0.613622	5.57483e-14
cg00829404	1	61362869	R	-	-	2.71	0.48	1.96e-08	2.78	0.67	3.65e-05	3	0.5	1.62e-09	3.32	0.58	1.14e-08	3.95	0.72	4.13e-08	0	2.44892	0.653806		2.93868	0.409081	6.78905e-13
cg02157636	11	68476835	F	MTL5	Body	4.28	0.84	3.53e-07	4.44	1.2	0.000228	5.03	0.86	4.45e-09	6.53	1.03	2.54e-10	5.84	1.22	1.87e-06	0	3.55417	0.469689		4.89141	0.672062	3.3828e-13
cg02317642	2	74278330	R	TET3	Body	3.96	0.81	1.08e-06	4.43	1.18	0.00018	4.33	0.79	4.79e-08	5.72	0.94	1.38e-09	7.05	1.34	1.39e-07	24.5995	5.305	0.257409		4.44168	0.662322	1.99729e-11
cg02378763	9	134363027	R	PRRC2B	Body	-8.08	1.26	1.27e-10	-5.82	1.72	0.000731	-7.18	1.31	4.59e-08	-9.75	1.61	1.51e-09	-13.9	2.32	1.96e-09	57.7948	9.47751	0.0502115		-4.74667	0.964263	8.54045e-07
cg04591628	11	120100875	R	-	-	-4.7	0.91	2.23e-07	-5.15	1.37	0.00017	-5.72	0.98	6.36e-09	-7.84	1.28	1.03e-09	-11.8	1.94	1.08e-09	70.3233	13.4786	0.00915932		-4.15075	0.749982	3.12188e-08
cg04816311	7	1066650	F	C7orf50	Body	-2.53	0.52	1.08e-06	-4.32	0.85	3.67e-07	-4.43	0.68	6.25e-11	-4.6	0.75	6.92e-10	-4.35	0.86	4.83e-07	54.1539	8.72485	0.0683572		-2.72186	0.428561	2.13716e-10
cg04924454	7	26327799	F	-	-	2.79	0.52	8.32e-08	2.42	0.71	0.000617	3.52	0.58	1.55e-09	3.4	0.6	1.78e-08	3.77	0.81	3.55e-06	0	2.70275	0.608733		2.76841	0.418821	3.84287e-11
cg06158227	15	43662311	R	TUBGCP4;ZSCAN29	TSS1500	1.47	0.35	2.71e-05	3.81	0.74	2.63e-07	2.59	0.48	5.26e-08	3.31	0.54	7.36e-10	3.73	0.68	3.9e-08	76.9446	17.3495	0.00165289		2.65949	0.379861	2.53742e-12
cg07054804	11	10621492	R	MRVI1	Body	4.51	0.81	2.79e-08	3.74	1.02	0.000231	4.26	0.76	2.35e-08	4.97	0.85	4.04e-09	4.85	1.04	3.02e-06	0	1.07029	0.898957		3.78276	0.623362	1.2926e-09
cg07514306	7	129934352	R	CPA4	Body	1.92	0.36	9.35e-08	3.15	0.61	2.09e-07	2.57	0.41	5.11e-10	3.39	0.52	4.81e-11	4.99	0.78	1.78e-10	74.5136	15.6946	0.00345754		2.78057	0.340901	3.44788e-16
cg07840258	9	130269866	R	FAM129B	Body	-4.03	0.91	8.98e-06	-5.53	1.41	9.15e-05	-6.54	1.07	9.44e-10	-6.64	1.23	6.64e-08	-6.73	1.41	1.79e-06	21.6045	5.10233	0.276958		-6.32425	0.876603	5.41325e-13
cg09019636	2	62964766	F	EHBP1	Body	2.65	0.6	1.13e-05	3.14	0.84	0.000186	3.83	0.66	5.26e-09	3.99	0.77	2.15e-07	4.86	0.99	8.93e-07	15.4627	4.73164	0.315958		3.48626	0.496742	2.24657e-12
cg09299075	10	76154015	F	ADK	Body	2.33	0.5	3.41e-06	2.25	0.66	0.00068	3.05	0.52	4.1e-09	3.77	0.6	4.25e-10	4.01	0.71	1.61e-08	40.8839	6.76634	0.148763		2.60895	0.399341	6.44041e-11
cg09828520	12	58169646	R	METTL21B	Body	-6.8	1.41	1.36e-06	-8.75	2.02	1.5e-05	-8.48	1.46	6.33e-09	-8.63	1.6	7.21e-08	-11.78	2.15	4.32e-08	0	3.80215	0.433444		-5.8526	1.17854	6.83613e-07
cg10072464	13	114064536	F	-	-	1.51	0.36	2.71e-05	1.91	0.56	0.000677	2.53	0.42	2.46e-09	2.57	0.48	9.84e-08	2.6	0.56	3e-06	28.1943	5.57059	0.233594		1.61165	0.301941	9.41723e-08
cg10256405	2	105374275	F	LINC01114	TSS200	2.6	0.7	0.000196	4.69	1.16	5.29e-05	3.11	0.77	5.86e-05	5.29	0.91	6.39e-09	4.01	1.08	0.000205	42.068	6.90464	0.141014		2.43437	0.564922	1.63831e-05
cg10472537	2	105348800	R	-	-	3.45	0.71	1.09e-06	5.49	1.17	2.77e-06	6.58	0.95	4.79e-12	5.02	0.96	1.48e-07	7.28	1.3	2e-08	62.8047	10.754	0.0294719		3.13464	0.555182	1.64076e-08
cg10614054	1	54801682	R	SSBP3	Body	2.86	0.59	1.1e-06	3.01	0.88	0.00067	3.48	0.65	6.92e-08	4.55	0.76	1.96e-09	3.81	0.87	1.34e-05	0	3.51454	0.47567		3.35518	0.535702	3.77273e-10
cg11544657	1	9968130	R	CTNNBIP1	5'UTR	3.79	0.72	1.27e-07	3.31	0.88	0.000183	4.73	0.74	1.78e-10	5.41	0.88	7.19e-10	6.48	1.09	2.82e-09	44.821	7.24914	0.123294		4.41464	0.555182	1.8396e-15
cg11787791	1	153329460	F	S100A9	TSS1500	3.22	0.59	4.07e-08	3.1	0.83	0.000185	4.16	0.65	1.15e-10	4.07	0.69	4.07e-09	3.22	0.75	1.81e-05	0	2.23758	0.692155		4.90356	0.594142	1.54225e-16
cg12510055	20	58296411	R	PHACTR3	5'UTR	1.2	0.25	1.08e-06	1.25	0.36	0.000605	1.23	0.26	3.08e-06	1.94	0.34	1.21e-08	1.82	0.39	3.26e-06	18.6584	4.91754	0.295864		0.993803	0.224021	9.15566e-06
cg12654199	17	78753826	F	RPTOR	Body	4.21	0.86	9.62e-07	3.45	1.06	0.001	5.98	0.98	1.22e-09	5.61	1.03	5.54e-08	6.13	1.28	1.57e-06	21.6713	5.10669	0.276525		5.06952	0.740242	7.46473e-12
cg12954441	16	84121218	F	MBTPS1	Body	-3.01	0.67	7.45e-06	-3.65	1.07	0.000655	-2.84	0.69	3.67e-05	-5.47	0.94	6.84e-09	-5.03	1.04	1.34e-06	48.6785	7.79401	0.0994221		-3.57617	0.584402	9.39502e-10
cg13241457	16	29758360	R	C16orf54	TSS1500	5.79	0.96	1.86e-09	4.04	1.26	0.001	6.28	1.03	9.56e-10	7.46	1.17	2.12e-10	8.73	1.51	7.87e-09	43.4288	7.07074	0.132197		4.61979	0.730502	2.54662e-10
cg13641778	3	52879742	F	TMEM110	Body	4.29	0.86	5.96e-07	4.1	1.17	0.000465	5.25	0.9	5.46e-09	6.34	1.08	3.89e-09	5.46	1.2	5.79e-06	0	3.03162	0.552548		5.82898	0.759722	1.68652e-14
cg13854688	3	43821635	R	-	-	4.56	0.85	8.07e-08	6.09	1.29	2.4e-06	6.57	1.02	1e-10	7.05	1.13	4.43e-10	6.83	1.37	6.16e-07	9.3769	4.41389	0.352881		4.97033	0.711022	2.741e-12
cg15255263	7	101574416	R	CUX1	Body	2.06	0.43	2.23e-06	3.13	0.73	1.76e-05	3.15	0.49	9.63e-11	3.47	0.57	1.19e-09	3.72	0.73	3.53e-07	37.8345	6.43444	0.168969		2.49868	0.409081	1.00864e-09
cg15685198	2	135163836	R	MGAT5	Body	1.53	0.4	0.00012	2.25	0.57	8.68e-05	2.22	0.43	2.96e-07	3.38	0.56	1.54e-09	2.88	0.62	3e-06	51.9966	8.33275	0.0801222		2.29057	0.340901	1.82772e-11
cg16855355	4	185269126	R	-	-	3.31	0.8	3.7e-05	3.74	1.19	0.002	3.51	0.87	5.27e-05	6.13	1.08	1.25e-08	5.37	1.16	3.88e-06	35.7416	6.22487	0.182972		3.59249	0.633102	1.39159e-08
cg16980393	10	6438364	R	-	-	3.1	0.54	9.07e-09	2.31	0.71	0.001	3.56	0.6	3.82e-09	3.37	0.6	2.37e-08	3.71	0.75	7.84e-07	0	2.50255	0.644179		2.20868	0.409081	6.69644e-08
cg17124293	10	45403981	R	-	-	2.28	0.42	4.36e-08	1.93	0.56	0.000595	2.81	0.49	7.72e-09	2.69	0.48	2.43e-08	3.07	0.64	1.46e-06	0	2.65066	0.617875		2.50976	0.370121	1.19414e-11
cg17944885	19	12225735	R	-	-	1.72	0.22	2.66e-15	2	0.34	5.12e-09	1.82	0.23	6.19e-15	2.39	0.32	6.08e-14	2.77	0.42	5.29e-11	43.3638	7.06262	0.132616		2.3438	0.224021	1.28504e-25
cg18019618	5	72964090	R	ARHGEF28	5'UTR	2.58	0.54	1.74e-06	4.33	0.92	2.26e-06	3.65	0.66	2.63e-08	4.34	0.75	6.31e-09	5.07	0.92	3.18e-08	48.0598	7.70116	0.103159		2.48707	0.467521	1.03947e-07
cg19526450	5	142254301	F	ARHGAP26	Body	2.91	0.74	7.7e-05	4.79	1.1	1.45e-05	5.14	0.84	7.84e-10	4.41	0.87	3.63e-07	4.52	1.1	4.02e-05	15.2854	4.72174	0.317058		4.34249	0.633102	6.93136e-12
cg20587151	11	44730975	R	-	-	1.26	0.32	9.1e-05	1.51	0.5	0.002	2.19	0.4	5.45e-08	2.49	0.43	6.37e-09	1.98	0.46	1.94e-05	41.6169	6.8513	0.143958		1.25219	0.282461	9.28742e-06
cg21961721	1	153751330	R	SLC27A3	Body	2.67	0.53	4.72e-07	2.69	0.73	0.000224	3.33	0.55	1.48e-09	3.81	0.64	2.19e-09	2.83	0.69	3.99e-05	0	2.52189	0.640721		4.06653	0.487001	6.81854e-17
cg22386583	17	78753756	R	RPTOR	Body	2.95	0.66	7.94e-06	4.24	0.98	1.59e-05	4.95	0.77	1.56e-10	4.6	0.8	9.19e-09	4.8	0.99	1.22e-06	22.1904	5.14075	0.273158		4.09464	0.555182	1.63953e-13
cg22675970	11	62563573	R	NXF1	3'UTR	-4.41	0.85	2.19e-07	-3.43	1.08	0.002	-4.3	0.87	7.28e-07	-6.59	1.11	2.85e-09	-4.84	1.18	4.34e-05	12.9467	4.59488	0.331444		-3.46832	0.662322	1.63553e-07
cg23024467	14	51354898	R	ABHD12B	Body	3.2	0.62	2.76e-07	3.05	0.88	0.000567	3.99	0.72	3.01e-08	4.56	0.8	1.23e-08	4.01	0.93	1.52e-05	0	2.62319	0.622721		3.02572	0.516222	4.59311e-09
cg24348980	1	232073393	R	DISC1-IT1;DISC1; TSNAX-DISC1	Body	1.86	0.42	7.99e-06	1.91	0.59	0.001	3.15	0.51	5.63e-10	3.38	0.56	1.54e-09	4.34	0.72	1.68e-09	69.7751	13.2341	0.0101867		2.29922	0.389601	3.60263e-09
cg24799186	8	103789208	R	-	-	3.34	0.64	1.94e-07	3.34	0.87	0.000132	3.43	0.67	2.67e-07	4.59	0.76	1.42e-09	4.39	0.95	3.62e-06	0	2.5351	0.638362		3.21518	0.535702	1.95127e-09
cg25544931	19	12097624	F	-	-	1.51	0.25	8.36e-10	2.03	0.38	6.48e-08	2.25	0.31	2.19e-13	2.14	0.32	1.8e-11	2.77	0.44	3.94e-10	48.3875	7.75006	0.101175		2.12299	0.253241	5.14622e-17
cg25752677	16	56309206	R	GNAO1	Body	2.35	0.4	3.36e-09	3.55	0.72	7.6e-07	2.38	0.43	3.91e-08	3.55	0.56	2.24e-10	4.9	0.79	6.29e-10	66.4436	11.9202	0.0179545		2.32084	0.331161	2.41423e-12
cg26098679	1	23681008	R	-	-	3.16	0.52	1.26e-09	2.89	0.81	0.000342	3.18	0.58	4.88e-08	4.32	0.7	8.01e-10	4.98	0.92	5.53e-08	23.8407	5.25215	0.26239		3.14707	0.467521	1.68056e-11
cg26171235	10	105311691	R	NEURL1	Body	3.11	0.59	1.16e-07	5.3	0.97	4.86e-08	5.13	0.76	1.75e-11	5.63	0.85	2.67e-11	5.39	0.97	2.6e-08	57.8997	9.50113	0.049724		3.59518	0.535702	1.9308e-11
cg26245643	12	54798513	R	ITGA5;LOC102724050	Body	-5.32	1.21	1.09e-05	-6.92	1.77	8.99e-05	-8.86	1.4	2.28e-10	-8.16	1.51	7.21e-08	-9.69	1.82	1.06e-07	32.6098	5.93558	0.204011		-5.86991	1.08114	5.65588e-08
cg26701500	20	36024614	F	SRC	Body	-5.09	0.97	1.71e-07	-5.32	1.44	0.00021	-5.77	1.11	2.05e-07	-8.45	1.43	3.25e-09	-9.22	1.73	9.63e-08	45.5661	7.34836	0.118585		-4.34425	0.876603	7.20407e-07
cg27373246	12	129336752	F	GLT1D1	TSS1500	2.29	0.54	2.2e-05	2.32	0.74	0.002	3.23	0.58	3e-08	3.93	0.66	2.45e-09	3.64	0.79	4.37e-06	25.5111	5.36993	0.251401		3.37788	0.438301	1.29071e-14
cg27410726	6	166900781	F	RPS6KA2	Body	2.44	0.43	2.08e-08	3.57	0.74	1.41e-06	3.18	0.5	1.62e-10	3.86	0.59	7.38e-11	3.76	0.74	3.86e-07	22.7382	5.1772	0.269594		2.86895	0.399341	6.75949e-13
CpG methylation sites were included if they met the following criteria: (1) reached epigenome-wide significance (P < 1.3e-8, Bonferroni-corrected for 773,566 CpGs and multiple ESRD groups) in at least one group (diabetic kidney disease [DKD], polycystic kidney disease [PKD], IgA nephropathy [IgAN], hypertensive kidney disease [HKD], or lupus nephritis [LN]); (2) showed Bonferroni-corrected P < 0.…
P-values in EWAS in GDPH and KTPH were derived from logistic models adjusting for the covariates, including age, sex, current smoking status and six WCCs (including granulocyte, monocyte, CD4+ T cell, CD8+ T cell, B-cell and nature killer cell).
1. CHR-chromosome.
2. The nearest gene was defined as the gene containing the CpG site within its gene body or within 1,500 bp upstream or downstream of its transcription start site (TSS).
3. se standard error
4. I_suared is the proportion of observed dispersion of results from different group included in a meta-analysis that is real. P values for heterogeneity was based on Cochran’s Q test.

## Sheet: Supplementary Table 4
Supplementary Table 4. ESRD-associated CpGs linked to uncontrolled anemia, and chronic kidney disease–mineral and bone disorder (CKD-MBD) in ESRD patients with Bonferroni adjusted p-value < 0.05.
CpG	Chr	Position (hg19)	Nearest Gene	CpG methylation effect on gene expression(eQTM)1	Enhancer linked genes2	Colocalized genes3	Effect on ESRD (primary kidney disease: DKD, LN, IgAN, PKD, HKD)				Effect on ESRD-related complications
							Estimate	P-value	Direction		Estimate	P-value4	Complications
cg07054804	11	10621492	MRVI1	BAIAP2, CD93, DLEU7, MRVI1, MTMR11, NDRG2, NEXN, SLC44A2, SP140	-	-	4.51, 3.74, 4.26, 4.97, 4.85	2.79e-08, 0.000231, 2.35e-08, 4.04e-09, 3.02e-06	+,+,+,+,+		2.8215	0.00021953	abnormal high level of PTH5 (n=362, case=81)
cg16980393	10	6438364	-	-	MIR3155A, PFKFB3, RBM17	-	3.1, 2.31, 3.56, 3.37, 3.71	9.07e-09, 0.001, 3.82e-09, 2.37e-08, 7.84e-07	+,+,+,+,+		1.91697	0.000954227	abnormal high level of PTH (n=362, case=81)
cg26171235	10	105311691	-	-	-	ATP5MK, NT5C2, SH3PXD2A	3.11, 5.3, 5.13, 5.63, 5.39	1.16e-07, 4.86e-08, 1.75e-11, 2.67e-11, 2.6e-08	+,+,+,+,+		1.27495	0.000257022	hyperphosphatemia6 (n=658, case=425)
cg13854688	3	43821635	-	-	-	-	4.56, 6.09, 6.57, 7.05, 6.83	8.07e-08, 2.4e-06, 1e-10, 4.43e-10, 6.16e-07	+,+,+,+,+		1.86363	0.000908317	hypocalcemia7 (n=645, case=304)
cg19526450	5	142254301	ARHGAP26	-	-	-	2.91, 4.79, 5.14, 4.41, 4.52	7.7e-05, 1.45e-05, 7.84e-10, 3.63e-07, 4.02e-05	+,+,+,+,+		2.10699	0.00073457	uncontrolled anemia8 (n=654, case=540)
1.Evidence from published blood eQTM data (Bonder et al 2017, Kennedy et.al 2018 and Keshawarz et.al 2023)
2.Genes expression regulated by DMP-containing active enhancers in bood. The genes were annotated using genomic imformation from enhancer-gene linkage (ABC Map and Epimap datasets), 3D chromatin interaction (Promoter capture Hi-C) and single-cell map of accessible chromatin regions.
3. Genes whose cis-eQTLs(cis-eQTLs, distance <1MB) occur at the same genomic location as a cis-meQTL. Cis-mQTLs were calculated from our dataset. The cis-eQTLs were identified from the eQTLGen dataset. The posterior probability of colocalization between DMP and gene (Coloc.PP.H3 and Coloc.PP.H4) greater than 0.8 was considered.
4.P-values for the association between ESRD-associated CpG sites and complications, were obtained from logistic models adjusted for age, sex, current smoking status, and six WCCs (granulocyte, monocyte, CD4+ T cell, CD8+ T cell, B-cell, and natural killer cell) only performed in ESRD patients.
5. Among 362 ESRD patients with measured parathyroid hormone (PTH) levels, 81 exhibited abnormal PTH levels exceeding 600 pg/mL.
6.Of 658 ESRD patients with measured phosphorus levels, 425 had hyperphosphatemia (>1.45 mmol/L).
7.Of 645 ESRD patients with measured calcium levels, 304 had hypocalcemia (< 2.1 mmol/L).
8.Of 654 ESRD patients measured hemoglobin levels, 540 prenseted untrolled anemia (Hb<115 g/dL ).

## Sheet: Supplementary Table 5
Supplementary Table 5. Number of meQTL SNPs identified for each ESRD associated differrentialy methylated loci (DML).
CpG	chr	Position(hg19)	Nearest_Gene	All meQTL1	cis-meQTL				trans-meQTL
					within_±10Kb	within_±100Kb	within_±1000Kb	same_chromosome	all trans-meQTL
cg00037671	chr20	4089909	-	87	52	74	78	78	9
cg00435244	chr8	116113510	LINC00536	171	16	127	171	171	-
cg00829404	chr1	60897197	-	36	4	36	36	36	-
cg04591628	chr11	120230166	-	41	14	20	20	20	21
cg04816311	chr7	1027014	C7orf50	192	15	149	192	192	-
cg04924454	chr7	26327799	-	20	-	-	-	-	20
cg06158227	chr15	43370113	TUBGCP4;ZSCAN29	575	19	216	575	575	-
cg07514306	chr7	130294512	CPA4	8	2	8	8	8	-
cg07840258	chr9	127507587	FAM129B	299	51	294	299	299	-
cg09299075	chr10	74394257	ADK	605	20	192	605	605	-
cg10072464	chr13	113410221	-	168	34	53	53	53	115
cg10256405	chr2	104757817	LINC01114	107	16	107	107	107	-
cg11544657	chr1	9968130	CTNNBIP1	13	-	-	-	-	13
cg11787791	chr1	153356984	S100A9	8	8	8	8	8	-
cg12954441	chr16	84087613	MBTPS1	4	3	4	4	4	-
cg15685198	chr2	134406265	MGAT5	21	5	5	5	5	16
cg16855355	chr4	185269126	-	3	-	-	-	-	3
cg17124293	chr10	44908533	-	147	34	146	146	146	1
cg17944885	chr19	12225735	-	1	-	-	-	-	1
cg20587151	chr11	44709425	-	9	6	9	9	9	-
cg21961721	chr1	153778854	SLC27A3	6	0	0	6	6	-
cg23024467	chr14	50888180	ABHD12B	89	16	89	89	89	-
cg24799186	chr8	102776980	-	429	9	30	30	30	399
cg26098679	chr1	23354515	-	110	11	97	110	110	-
cg26171235	chr10	103551934	NEURL1	37	13	37	37	37	-
cg26701500	chr20	36024614	SRC	1	-	-	-	-	1
cg27373246	chr12	128852207	GLT1D1	3	3	3	3	3	-
cg27410726	chr6	166487293	RPS6KA2	159	0	0	159	159	-
1. For each differentially methylated loci (DMLs) associated with end-stage renal disease (ESRD), meQTL SNPs (p value < 5e-8) were identified from the genome-wide genotyping data of 924 GDPH participants, considering SNPs with a minor allele frequency (MAF) > 0.01 and imputation information scores > 0.60. The analysis was conducted using the MatrixEQTL tool under an additive model. Genotype was u…
The SNPs identified at a significance threshold of p value < 5e-8 were summarized based on their proximity to the CpG sites. CpGs with only cis-meQTLs are highlighted in red, while the one with a trans-meQTL is indicated in blue. cis-meQTL:SNP-CpG distance within ±1MB on the same chromosome. long-range cis-meQTL: SNP-CpG distance > 1MB but on the same chromosome. trans-meQTL: SNPs that were on di…
-	-	-	-	-	-	-	-	-	-

## Sheet: Supplementary Table 6
Supplementary Table 6. meQTL SNPs associated with DNA methylation at 26 ESRD-associated CpGs (P < 5e-8).
CpG	CpG_chr	CpG_position(hg19)	SNP1	SNP_chr	SNP_position(hg19)	Freq	A12	A2	Beta3	t_stat	P_value4	SNP_relation_to_gene	GeneSymbol_nearest_to_SNP
cg17944885	19	12114920	rs145118782	1	10941161	0.02056	T	C	-0.54	-5.59	3.07e-08	Distal Intergenic	C1orf127
cg26098679	1	23354515	rs2749151	1	23569812	0.3144	T	C	-0.08	-6.57	8.45e-11	Distal Intergenic	HTR1D
cg26098679	1	23354515	rs2806573	1	23572586	0.3122	G	A	-0.08	-6.57	8.48e-11	Distal Intergenic	HTR1D
cg26098679	1	23354515	rs2749150	1	23572674	0.3122	C	T	-0.08	-6.57	8.48e-11	Distal Intergenic	HTR1D
cg26098679	1	23354515	rs9662343	1	23574051	0.4048	G	C	-0.07	-6.33	3.72e-10	Distal Intergenic	HTR1D
cg26098679	1	23354515	rs2144733	1	23575369	0.3122	G	A	-0.08	-6.57	8.48e-11	Distal Intergenic	HTR1D
cg26098679	1	23354515	rs1535180	1	23577073	0.3122	G	T	-0.08	-6.57	8.48e-11	Distal Intergenic	HTR1D
cg26098679	1	23354515	rs672902	1	23577118	0.3122	C	T	-0.08	-6.57	8.48e-11	Distal Intergenic	HTR1D
cg26098679	1	23354515	rs1467770	1	23577250	0.3122	A	G	-0.08	-6.57	8.48e-11	Distal Intergenic	HTR1D
cg26098679	1	23354515	rs2749148	1	23578927	0.3095	C	T	-0.08	-6.7	3.62e-11	Distal Intergenic	LINC01355
cg26098679	1	23354515	rs2776825	1	23579077	0.2938	C	G	-0.09	-7.12	2.11e-12	Distal Intergenic	LINC01355
cg26098679	1	23354515	rs12069569	1	23579474	0.1824	C	A	-0.09	-6.64	5.38e-11	Distal Intergenic	LINC01355
cg26098679	1	23354515	rs9701250	1	23579767	0.2565	C	T	-0.11	-8.9	2.85e-18	Distal Intergenic	LINC01355
cg26098679	1	23354515	rs72659743	1	23580269	0.2695	A	G	-0.11	-8.75	1e-17	Distal Intergenic	LINC01355
cg26098679	1	23354515	rs368118797	1	23581450	0.2706	G	A	-0.11	-8.94	2.07e-18	Distal Intergenic	LINC01355
cg26098679	1	23354515	rs2749146	1	23582880	0.2706	C	T	-0.11	-8.94	2.07e-18	Distal Intergenic	LINC01355
cg26098679	1	23354515	rs9725266	1	23583406	0.27	C	G	-0.11	-8.9	3.02e-18	Distal Intergenic	LINC01355
cg26098679	1	23354515	rs9287043	1	23583451	0.2706	G	A	-0.11	-8.94	2.07e-18	Distal Intergenic	LINC01355
cg26098679	1	23354515	rs76768765	1	23583749	0.2711	G	A	-0.11	-8.94	2.03e-18	Distal Intergenic	LINC01355
cg26098679	1	23354515	rs147997113	1	23583839	0.2711	G	A	-0.11	-8.94	2.03e-18	Distal Intergenic	LINC01355
cg26098679	1	23354515	rs9792898	1	23584865	0.2706	C	T	-0.11	-8.95	1.94e-18	Distal Intergenic	LINC01355
cg26098679	1	23354515	rs2806547	1	23585355	0.2711	C	T	-0.11	-8.94	2.03e-18	Distal Intergenic	LINC01355
cg26098679	1	23354515	rs59613632	1	23585356	0.2711	A	G	-0.11	-8.94	2.03e-18	Distal Intergenic	LINC01355
cg26098679	1	23354515	rs72659751	1	23585833	0.2706	T	C	-0.11	-8.95	1.87e-18	Distal Intergenic	LINC01355
cg26098679	1	23354515	rs9658850	1	23587590	0.27	A	G	-0.11	-9	1.23e-18	Distal Intergenic	LINC01355
cg26098679	1	23354515	rs61006848	1	23588969	0.27	A	G	-0.11	-9	1.23e-18	Distal Intergenic	LINC01355
cg26098679	1	23354515	rs12565271	1	23589214	0.408	A	G	-0.09	-8.34	2.78e-16	Distal Intergenic	LINC01355
cg26098679	1	23354515	rs12080801	1	23589328	0.27	A	G	-0.11	-9	1.23e-18	Distal Intergenic	LINC01355
cg26098679	1	23354515	rs2806548	1	23590184	0.2706	G	A	-0.11	-8.99	1.34e-18	Distal Intergenic	LINC01355
cg26098679	1	23354515	rs16828151	1	23590294	0.2706	A	T	-0.11	-8.99	1.34e-18	Distal Intergenic	LINC01355
cg26098679	1	23354515	rs10917366	1	23592651	0.1434	T	C	-0.11	-6.93	7.84e-12	Distal Intergenic	LINC01355
cg26098679	1	23354515	rs2749145	1	23592721	0.2716	C	G	-0.11	-8.82	5.57e-18	Distal Intergenic	LINC01355
cg26098679	1	23354515	rs12035420	1	23597150	0.4091	G	A	-0.09	-8.1	1.77e-15	Distal Intergenic	LINC01355
cg26098679	1	23354515	rs12133306	1	23599544	0.2695	A	G	-0.11	-8.93	2.23e-18	Distal Intergenic	LINC01355
cg26098679	1	23354515	rs678007	1	23600579	0.2505	T	C	-0.11	-8.78	7.97e-18	Distal Intergenic	LINC01355
cg26098679	1	23354515	rs607747	1	23600610	0.3306	A	G	-0.09	-8.17	9.81e-16	Distal Intergenic	LINC01355
cg26098679	1	23354515	rs2039316	1	23600798	0.2284	T	C	-0.11	-8.95	1.99e-18	Distal Intergenic	LINC01355
cg26098679	1	23354515	rs74223750	1	23602336	0.1245	A	G	-0.11	-6.53	1.06e-10	Distal Intergenic	LINC01355
cg26098679	1	23354515	rs57575916	1	23602620	0.2273	A	G	-0.12	-9.22	2.05e-19	Distal Intergenic	LINC01355
cg26098679	1	23354515	rs628465	1	23604370	0.2256	G	T	-0.12	-9.24	1.64e-19	Distal Intergenic	LINC01355
cg26098679	1	23354515	rs656342	1	23607360	0.2267	T	A	-0.12	-9.38	5.04e-20	Distal Intergenic	LINC01355
cg26098679	1	23354515	rs12043534	1	23613344	0.4232	T	C	-0.09	-8	3.67e-15	Promoter	LINC01355
cg26098679	1	23354515	rs1211737	1	23613974	0.2267	C	T	-0.12	-9.38	5.04e-20	Promoter	LINC01355
cg26098679	1	23354515	rs2806552	1	23614479	0.2267	T	C	-0.12	-9.38	5.04e-20	Promoter	LINC01355
cg26098679	1	23354515	rs9661830	1	23614982	0.2267	C	T	-0.12	-9.38	5.04e-20	Promoter	LINC01355
cg26098679	1	23354515	rs1198498	1	23616288	0.2267	G	A	-0.12	-9.38	5.04e-20	Distal Intergenic	LINC01355
cg26098679	1	23354515	rs10753554	1	23619009	0.4226	T	C	-0.09	-7.98	4.42e-15	Distal Intergenic	LINC01355
cg26098679	1	23354515	rs611619	1	23621691	0.2273	G	A	-0.12	-9.33	7.87e-20	Distal Intergenic	LINC01355
cg26098679	1	23354515	rs589939	1	23622699	0.2267	A	C	-0.12	-9.38	5.04e-20	Distal Intergenic	LINC01355
cg26098679	1	23354515	rs2749160	1	23624007	0.2267	C	T	-0.12	-9.38	5.04e-20	Distal Intergenic	LINC01355
cg26098679	1	23354515	rs655600	1	23631625	0.2267	G	A	-0.12	-9.33	7.71e-20	3' UTR	HNRNPR
cg26098679	1	23354515	rs1535179	1	23639009	0.131	G	A	-0.11	-7.15	1.79e-12	Promoter	HNRNPR
cg26098679	1	23354515	rs3765941	1	23639549	0.4269	C	T	-0.09	-8.1	1.74e-15	Promoter	HNRNPR
cg26098679	1	23354515	rs642706	1	23641367	0.2267	G	A	-0.12	-9.33	7.71e-20	Promoter	HNRNPR
cg26098679	1	23354515	rs10493016	1	23642023	0.2267	T	A	-0.12	-9.33	7.71e-20	Promoter	HNRNPR
cg26098679	1	23354515	rs10917370	1	23642837	0.2267	G	A	-0.12	-9.33	7.71e-20	Promoter	HNRNPR
cg26098679	1	23354515	rs56176431	1	23643466	0.2267	C	A	-0.12	-9.33	7.71e-20	Intron	HNRNPR
cg26098679	1	23354515	rs2749162	1	23643811	0.2267	C	T	-0.12	-9.33	7.71e-20	Intron	HNRNPR
cg26098679	1	23354515	rs686451	1	23650844	0.2289	G	A	-0.12	-9.42	3.65e-20	Intron	HNRNPR
cg26098679	1	23354515	rs646317	1	23656285	0.2273	C	T	-0.12	-9.32	8.04e-20	Intron	HNRNPR
cg26098679	1	23354515	rs4648861	1	23657175	0.2273	G	A	-0.12	-9.32	8.04e-20	Intron	HNRNPR
cg26098679	1	23354515	rs12140750	1	23659141	0.2267	T	C	-0.12	-9.33	7.71e-20	Intron	HNRNPR
cg26098679	1	23354515	rs28656857	1	23663032	0.2278	C	T	-0.12	-9.16	3.3e-19	Intron	HNRNPR
cg26098679	1	23354515	rs11586100	1	23664511	0.4253	T	G	-0.09	-8.24	5.78e-16	Intron	HNRNPR
cg26098679	1	23354515	rs633278	1	23664797	0.2278	G	A	-0.12	-9.34	6.8e-20	Exon	HNRNPR
cg26098679	1	23354515	rs2103910	1	23667741	0.4275	G	A	-0.09	-8.19	8.6e-16	Intron	HNRNPR
cg26098679	1	23354515	rs2103911	1	23667751	0.4269	A	C	-0.09	-8.12	1.49e-15	Intron	HNRNPR
cg26098679	1	23354515	rs3753250	1	23669770	0.2267	A	G	-0.12	-9.5	1.82e-20	Promoter	HNRNPR
cg26098679	1	23354515	rs12409193	1	23670803	0.2246	C	G	-0.12	-9.49	1.98e-20	Promoter	HNRNPR
cg26098679	1	23354515	rs611159	1	23675941	0.2267	G	A	-0.12	-9.43	3.19e-20	Distal Intergenic	HNRNPR
cg26098679	1	23354515	rs614224	1	23676591	0.2267	G	A	-0.12	-9.43	3.19e-20	Distal Intergenic	HNRNPR
cg26098679	1	23354515	rs61777130	1	23678721	0.2273	G	A	-0.12	-9.4	4.16e-20	Distal Intergenic	HNRNPR
cg26098679	1	23354515	rs61777131	1	23678811	0.2267	G	A	-0.12	-9.27	1.27e-19	Distal Intergenic	HNRNPR
cg26098679	1	23354515	rs12563200	1	23680630	0.1705	T	C	-0.1	-6.87	1.19e-11	Distal Intergenic	HNRNPR
cg26098679	1	23354515	rs74416781	1	23684954	0.1705	G	T	-0.1	-6.87	1.19e-11	Distal Intergenic	ZNF436
cg26098679	1	23354515	rs79253736	1	23685489	0.1705	T	C	-0.1	-6.87	1.19e-11	Distal Intergenic	ZNF436
cg26098679	1	23354515	rs41300120	1	23685968	0.1705	C	T	-0.1	-6.87	1.19e-11	3' UTR	ZNF436
cg26098679	1	23354515	rs644749	1	23687827	0.2814	C	T	-0.11	-9.7	3.13e-21	3' UTR	ZNF436
cg26098679	1	23354515	rs2849028	1	23688933	0.369	A	G	-0.11	-10.02	1.63e-22	Exon	ZNF436
cg26098679	1	23354515	rs3795308	1	23689083	0.1705	A	G	-0.1	-6.87	1.19e-11	Exon	ZNF436
cg26098679	1	23354515	rs2849026	1	23691613	0.369	G	A	-0.11	-10.02	1.63e-22	Intron	ZNF436
cg26098679	1	23354515	rs10917373	1	23691745	0.369	C	T	-0.11	-10.02	1.63e-22	Intron	ZNF436
cg26098679	1	23354515	rs61777134	1	23691762	0.2814	G	A	-0.11	-9.7	3.13e-21	Intron	ZNF436
cg26098679	1	23354515	rs10917374	1	23693167	0.1705	C	G	-0.1	-6.87	1.19e-11	Promoter	ZNF436
cg26098679	1	23354515	rs618237	1	23693385	0.2814	C	T	-0.11	-9.71	2.68e-21	Promoter	ZNF436
cg26098679	1	23354515	rs2849025	1	23693422	0.369	T	C	-0.11	-10.04	1.43e-22	Promoter	ZNF436
cg26098679	1	23354515	rs680386	1	23695275	0.2673	T	G	-0.12	-9.64	5.32e-21	Promoter	ZNF436-AS1
cg26098679	1	23354515	rs638722	1	23697617	0.2673	C	T	-0.12	-9.64	5.32e-21	Promoter	ZNF436-AS1
cg26098679	1	23354515	rs754984	1	23698120	0.1705	G	C	-0.1	-6.87	1.19e-11	Promoter	ZNF436-AS1
cg26098679	1	23354515	rs2144734	1	23699168	0.3669	C	T	-0.11	-10.16	4.71e-23	Promoter	ZNF436-AS1
cg26098679	1	23354515	rs2749153	1	23699340	0.355	G	A	-0.11	-10.11	7.09e-23	Promoter	ZNF436-AS1
cg26098679	1	23354515	rs9887921	1	23700811	0.1705	T	C	-0.1	-6.87	1.19e-11	Distal Intergenic	ZNF436-AS1
cg26098679	1	23354515	rs10799794	1	23701118	0.3555	C	A	-0.11	-10.11	7.54e-23	Distal Intergenic	ZNF436-AS1
cg26098679	1	23354515	rs1293616523	1	23701583	0.1705	T	C	-0.1	-6.87	1.19e-11	Distal Intergenic	ZNF436-AS1
cg26098679	1	23354515	rs694843	1	23702239	0.2668	C	A	-0.11	-9.56	1.03e-20	Distal Intergenic	ZNF436-AS1
cg26098679	1	23354515	rs9887775	1	23702531	0.2668	G	A	-0.11	-9.56	1.03e-20	Distal Intergenic	ZNF436-AS1
cg26098679	1	23354515	rs10753555	1	23703118	0.355	G	C	-0.11	-10.11	7.09e-23	Distal Intergenic	ZNF436-AS1
cg26098679	1	23354515	rs664755	1	23706760	0.256	G	A	-0.09	-7.45	2.09e-13	Distal Intergenic	ZNF436-AS1
cg26098679	1	23354515	rs7532311	1	23708486	0.1705	C	T	-0.1	-6.91	8.89e-12	Intron	ZNF436-AS1
cg26098679	1	23354515	rs10737472	1	23708919	0.2587	C	A	-0.1	-7.82	1.39e-14	Intron	ZNF436-AS1
cg26098679	1	23354515	rs10917375	1	23708989	0.1721	C	T	-0.1	-7.18	1.41e-12	Intron	ZNF436-AS1
cg26098679	1	23354515	rs10917376	1	23709506	0.4242	C	T	-0.07	-6.41	2.3e-10	Intron	ZNF436-AS1
cg26098679	1	23354515	rs2298633	1	23710241	0.1645	C	G	-0.1	-6.61	6.68e-11	3' UTR	ZNF436-AS1
cg26098679	1	23354515	rs2298632	1	23710475	0.3442	C	T	-0.09	-8.59	3.62e-17	3' UTR	ZNF436-AS1
cg26098679	1	23354515	rs649458	1	23712528	0.2532	T	A	-0.09	-6.97	6.18e-12	Intron	ZNF436-AS1
cg26098679	1	23354515	rs12126283	1	23712625	0.164	A	G	-0.1	-6.6	7.04e-11	Intron	ZNF436-AS1
cg26098679	1	23354515	rs1198443	1	23712773	0.2532	A	T	-0.09	-6.97	6.18e-12	Intron	ZNF436-AS1
cg26098679	1	23354515	rs1212034	1	23714665	0.2532	C	T	-0.09	-6.97	6.18e-12	Intron	ZNF436-AS1
cg26098679	1	23354515	rs12136719	1	23714814	0.164	G	C	-0.1	-6.6	7.04e-11	Intron	ZNF436-AS1
cg26098679	1	23354515	rs61777147	1	23715696	0.2516	C	T	-0.1	-8.48	8.73e-17	Intron	ZNF436-AS1
cg26098679	1	23354515	rs72882938	1	23716014	0.1623	G	A	-0.1	-6.49	1.38e-10	Intron	ZNF436-AS1
cg00829404	1	60897197	rs12404270	1	61264038	0.4486	T	C	0.08	6.86	1.24e-11	Intron	LOC101926964
cg00829404	1	60897197	rs11207672	1	61283756	0.3766	T	C	0.08	6.66	4.7e-11	Intron	LOC101926964
cg00829404	1	60897197	rs7516519	1	61298261	0.1883	C	T	-0.09	-6.06	2e-09	Intron	LOC101926964
cg00829404	1	60897197	rs7527310	1	61298470	0.1883	G	A	-0.09	-6.06	2e-09	Intron	LOC101926964
cg00829404	1	60897197	rs12032365	1	61306937	0.3755	A	G	0.08	6.78	2.18e-11	Intron	LOC101926964
cg00829404	1	60897197	rs149941808	1	61311551	0.3761	T	A	0.08	6.82	1.62e-11	Intron	LOC101926964
cg00829404	1	60897197	rs310159	1	61320892	0.3295	A	G	-0.11	-8.64	2.36e-17	Intron	NFIA
cg00829404	1	60897197	rs310160	1	61322088	0.3382	A	T	-0.11	-8.92	2.5e-18	Intron	NFIA
cg00829404	1	60897197	rs365340	1	61323041	0.3371	C	G	-0.11	-9.05	8.41e-19	Intron	NFIA
cg00829404	1	60897197	rs434663	1	61323174	0.3804	C	T	0.09	7.08	2.83e-12	Intron	NFIA
cg00829404	1	60897197	rs383885	1	61325031	0.3804	T	G	0.09	7.08	2.83e-12	Intron	NFIA
cg00829404	1	60897197	rs444867	1	61325161	0.3382	T	C	-0.11	-9.16	3.29e-19	Intron	NFIA
cg00829404	1	60897197	rs367985	1	61326384	0.4215	G	A	0.07	5.96	3.54e-09	Intron	NFIA
cg00829404	1	60897197	rs446550	1	61331609	0.4226	G	A	0.08	6.19	9.01e-10	Promoter	NFIA
cg00829404	1	60897197	rs6657429	1	61332973	0.4226	C	T	0.08	6.19	9.01e-10	Promoter	LOC101926964
cg00829404	1	60897197	rs79321860	1	61335017	0.2381	T	A	-0.17	-13.23	9.85e-37	Promoter	LOC101926964
cg00829404	1	60897197	rs310171	1	61335938	0.3328	C	T	-0.12	-9.49	1.93e-20	Promoter	LOC101926964
cg00829404	1	60897197	rs310172	1	61337290	0.3328	T	C	-0.12	-9.49	1.93e-20	Intron	LOC101926964
cg00829404	1	60897197	rs310173	1	61337486	0.382	C	T	0.09	7.1	2.42e-12	Intron	LOC101926964
cg00829404	1	60897197	rs310174	1	61337677	0.3323	T	G	-0.11	-9.37	5.25e-20	Intron	LOC101926964
cg00829404	1	60897197	rs435215	1	61339842	0.2386	T	A	-0.17	-13.15	2.58e-36	Intron	LOC101926964
cg00829404	1	60897197	rs421735	1	61341375	0.3231	G	A	-0.12	-9.43	3.16e-20	Intron	LOC101926964
cg00829404	1	60897197	rs479445	1	61341632	0.3312	A	T	-0.12	-9.49	1.88e-20	Intron	LOC101926964
cg00829404	1	60897197	rs6663597	1	61343142	0.3241	T	G	-0.11	-9.41	3.92e-20	Intron	LOC101926964
cg00829404	1	60897197	rs6667336	1	61344572	0.2359	T	C	-0.17	-13.32	3.75e-37	Intron	LOC101926964
cg00829404	1	60897197	rs12145881	1	61345171	0.2359	A	G	-0.17	-13.32	3.75e-37	Intron	LOC101926964
cg00829404	1	60897197	rs12028411	1	61345610	0.3847	G	A	0.09	7.15	1.71e-12	Intron	LOC101926964
cg00829404	1	60897197	rs4101495	1	61349657	0.2365	A	G	-0.17	-13.31	4.4e-37	Intron	LOC101926964
cg00829404	1	60897197	rs17121188	1	61349796	0.2365	G	T	-0.17	-13.31	4.4e-37	Intron	LOC101926964
cg00829404	1	60897197	rs17121191	1	61350719	0.2365	A	C	-0.17	-13.31	4.4e-37	Intron	LOC101926964
cg00829404	1	60897197	rs17121201	1	61351733	0.2365	G	A	-0.17	-13.31	4.4e-37	Intron	LOC101926964
cg00829404	1	60897197	rs12401502	1	61351756	0.3826	A	G	0.09	7.1	2.57e-12	Intron	LOC101926964
cg00829404	1	60897197	rs1447184	1	61355010	0.2365	A	G	-0.17	-13.3	4.56e-37	Intron	LOC101926964
cg00829404	1	60897197	rs12121159	1	61355513	0.2365	A	G	-0.17	-13.3	4.56e-37	Intron	LOC101926964
cg00829404	1	60897197	rs12126079	1	61356057	0.2365	C	T	-0.17	-13.3	4.56e-37	Intron	LOC101926964
cg00829404	1	60897197	rs12122228	1	61356520	0.2359	T	G	-0.17	-13.32	3.75e-37	Intron	LOC101926964
cg11787791	1	153356984	rs2916198	1	153327732	0.1196	T	C	-0.08	-5.79	9.57e-09	Promoter	S100A9
cg11787791	1	153356984	rs11205276	1	153328884	0.1169	C	G	-0.08	-5.71	1.51e-08	Promoter	S100A9
cg11787791	1	153356984	rs2916193	1	153331849	0.3685	A	G	0.07	7.01	4.46e-12	Promoter	S100A9
cg11787791	1	153356984	rs2070864	1	153333800	0.4156	G	A	0.06	6.4	2.52e-10	Distal Intergenic	S100A9
cg11787791	1	153356984	rs1560833	1	153334525	0.4145	A	G	0.06	6.42	2.2e-10	Distal Intergenic	S100A9
cg11787791	1	153356984	rs1560832	1	153335384	0.3961	A	G	0.07	6.93	7.97e-12	Distal Intergenic	S100A9
cg11787791	1	153356984	rs724781	1	153336018	0.3956	G	C	0.06	6.82	1.63e-11	Distal Intergenic	S100A9
cg11787791	1	153356984	rs3014874	1	153337943	0.342	A	G	0.07	6.88	1.09e-11	Distal Intergenic	S100A9
cg21961721	1	153778854	rs117133626	1	153417177	0.02165	T	C	0.3	7.91	7.43e-15	Distal Intergenic	S100A7
cg21961721	1	153778854	rs116283610	1	153481977	0.02435	G	A	0.29	7.96	4.96e-15	Distal Intergenic	LOC124904423
cg21961721	1	153778854	rs141835572	1	153522712	0.01407	A	G	0.41	8.46	1.01e-16	Promoter	S100A4
cg21961721	1	153778854	rs142564285	1	154000678	0.02165	C	T	0.3	7.8	1.62e-14	Intron	NUP210L
cg21961721	1	153778854	rs72698128	1	154391819	0.02056	A	G	0.26	6.71	3.46e-11	Intron	IL6R
cg21961721	1	153778854	rs76159278	1	154586147	0.01677	A	G	0.28	6.29	4.94e-10	Promoter	ADAR
cg11544657	1	9908072	rs1184391480	1	233350362	0.01894	A	G	0.17	5.6	2.89e-08	Intron	PCNX2
cg11544657	1	9908072	rs78635246	1	233350629	0.01894	A	T	0.17	5.6	2.89e-08	Intron	PCNX2
cg11544657	1	9908072	rs75041937	1	233350656	0.01894	A	C	0.17	5.6	2.89e-08	Intron	PCNX2
cg11544657	1	9908072	rs10489804	1	233351252	0.01894	C	G	0.17	5.6	2.89e-08	Promoter	PCNX2
cg11544657	1	9908072	rs2357582	1	233353472	0.01786	C	T	0.18	5.7	1.63e-08	Promoter	PCNX2
cg10256405	2	104757817	rs13407365	2	105368421	0.1364	T	G	-0.1	-9	1.25e-18	Promoter	LINC01114
cg10256405	2	104757817	rs34010017	2	105368981	0.07035	A	G	-0.13	-8.88	3.34e-18	Promoter	LINC01114
cg10256405	2	104757817	rs2376242	2	105370065	0.07035	A	C	-0.13	-8.88	3.34e-18	Promoter	LINC01114
cg10256405	2	104757817	rs3811546	2	105371171	0.1364	C	T	-0.1	-9	1.25e-18	Promoter	LINC01114
cg10256405	2	104757817	rs10190000	2	105371646	0.07035	C	T	-0.13	-8.88	3.34e-18	Promoter	LINC01114
cg10256405	2	104757817	rs12472965	2	105372041	0.07035	G	T	-0.13	-8.88	3.34e-18	Promoter	LINC01114
cg10256405	2	104757817	rs12472204	2	105372227	0.07035	G	A	-0.13	-8.88	3.34e-18	Promoter	LINC01114
cg10256405	2	104757817	rs3942369	2	105372302	0.07035	G	C	-0.13	-8.88	3.34e-18	Promoter	LINC01114
cg10256405	2	104757817	rs10196234	2	105373246	0.1391	C	T	-0.1	-8.93	2.18e-18	Promoter	LINC01114
cg10256405	2	104757817	rs36050054	2	105375567	0.07089	T	G	-0.13	-8.8	6.43e-18	Promoter	LINC01114
cg10256405	2	104757817	rs4452168	2	105375946	0.07089	G	C	-0.13	-8.8	6.43e-18	Promoter	LINC01114
cg10256405	2	104757817	rs4851714	2	105377465	0.151	C	T	-0.09	-8.31	3.35e-16	Distal Intergenic	LINC01114
cg10256405	2	104757817	rs881911	2	105377712	0.07305	G	A	-0.12	-8.73	1.2e-17	Distal Intergenic	LINC01114
cg10256405	2	104757817	rs881912	2	105377718	0.1521	T	C	-0.09	-8.28	4.36e-16	Distal Intergenic	LINC01114
cg10256405	2	104757817	rs2889326	2	105377920	0.07305	G	A	-0.12	-8.73	1.2e-17	Distal Intergenic	LINC01114
cg10256405	2	104757817	rs13028541	2	105379887	0.07305	T	C	-0.12	-8.73	1.2e-17	Distal Intergenic	LINC01114
cg10256405	2	104757817	rs9941656	2	105384459	0.1499	C	T	-0.09	-8.32	3.03e-16	Intron	LINC01114
cg10256405	2	104757817	rs6735445	2	105386496	0.1504	T	C	-0.09	-8.38	2.04e-16	Intron	LINC01114
cg10256405	2	104757817	rs2889325	2	105387212	0.07305	G	A	-0.12	-8.73	1.2e-17	Intron	LINC01114
cg10256405	2	104757817	rs13003463	2	105388252	0.1504	G	C	-0.09	-8.38	2.04e-16	Exon	LINC01114
cg10256405	2	104757817	rs13034712	2	105388360	0.07305	A	T	-0.12	-8.73	1.2e-17	Intron	LINC01114
cg10256405	2	104757817	rs12327982	2	105389090	0.07305	A	T	-0.12	-8.73	1.2e-17	Intron	LINC01114
cg10256405	2	104757817	rs4851715	2	105389683	0.07305	A	T	-0.12	-8.73	1.2e-17	Intron	LINC01114
cg10256405	2	104757817	rs17629548	2	105391289	0.1488	T	G	-0.09	-8.59	3.55e-17	Intron	LINC01114
cg10256405	2	104757817	rs675474	2	105392242	0.151	A	G	-0.09	-8.41	1.57e-16	Intron	LINC01114
cg10256405	2	104757817	rs428917	2	105392375	0.151	C	T	-0.09	-8.41	1.57e-16	Intron	LINC01114
cg10256405	2	104757817	rs66949364	2	105392857	0.151	G	T	-0.09	-8.41	1.57e-16	Intron	LINC01114
cg10256405	2	104757817	rs58289281	2	105392858	0.151	C	T	-0.09	-8.41	1.57e-16	Intron	LINC01114
cg10256405	2	104757817	rs451800	2	105393301	0.151	T	A	-0.09	-8.41	1.57e-16	Intron	LINC01114
cg10256405	2	104757817	rs1451531	2	105394025	0.151	T	A	-0.09	-8.41	1.57e-16	Intron	LINC01114
cg10256405	2	104757817	rs434185	2	105394791	0.151	A	G	-0.09	-8.41	1.57e-16	Intron	LINC01114
cg10256405	2	104757817	rs442203	2	105395302	0.07359	T	C	-0.12	-8.76	9.5e-18	Intron	LINC01114
cg10256405	2	104757817	rs390160	2	105396015	0.07359	A	G	-0.12	-8.76	9.5e-18	Intron	LINC01114
cg10256405	2	104757817	rs403491	2	105396291	0.07359	G	A	-0.12	-8.76	9.5e-18	Intron	LINC01114
cg10256405	2	104757817	rs430253	2	105396498	0.151	C	G	-0.09	-8.41	1.57e-16	Intron	LINC01114
cg10256405	2	104757817	rs428443	2	105396773	0.07359	G	A	-0.12	-8.76	9.5e-18	Intron	LINC01114
cg10256405	2	104757817	rs2443490	2	105396991	0.151	G	A	-0.09	-8.41	1.57e-16	Intron	LINC01114
cg10256405	2	104757817	rs2443491	2	105397001	0.07359	G	A	-0.12	-8.76	9.5e-18	Intron	LINC01114
cg10256405	2	104757817	rs384964	2	105398852	0.07359	A	G	-0.12	-8.76	9.5e-18	Intron	LINC01114
cg10256405	2	104757817	rs410011	2	105399043	0.151	T	C	-0.09	-8.41	1.57e-16	Intron	LINC01114
cg10256405	2	104757817	rs2443489	2	105400160	0.151	A	G	-0.09	-8.41	1.57e-16	Intron	LINC01114
cg10256405	2	104757817	rs419465	2	105400885	0.151	T	C	-0.09	-8.41	1.57e-16	Intron	LINC01114
cg10256405	2	104757817	rs365389	2	105401358	0.07359	T	G	-0.12	-8.76	9.5e-18	Intron	LINC01114
cg10256405	2	104757817	rs445388	2	105401584	0.151	A	G	-0.09	-8.41	1.57e-16	Intron	LINC01114
cg10256405	2	104757817	rs444636	2	105401629	0.151	T	C	-0.09	-8.41	1.57e-16	Intron	LINC01114
cg10256405	2	104757817	rs367463	2	105401647	0.151	G	A	-0.09	-8.41	1.57e-16	Intron	LINC01114
cg10256405	2	104757817	rs376337	2	105401824	0.07359	G	A	-0.12	-8.76	9.5e-18	Intron	LINC01114
cg10256405	2	104757817	rs648030	2	105402234	0.151	T	C	-0.09	-8.41	1.57e-16	Intron	LINC01114
cg10256405	2	104757817	rs650149	2	105402242	0.151	A	G	-0.09	-8.41	1.57e-16	Intron	LINC01114
cg10256405	2	104757817	rs647538	2	105402361	0.1531	C	T	-0.09	-8.15	1.18e-15	Intron	PANTR1
cg10256405	2	104757817	rs651027	2	105402377	0.1531	A	G	-0.09	-8.26	5.1e-16	Intron	PANTR1
cg10256405	2	104757817	rs79006041	2	105402389	0.1558	A	G	-0.09	-8.18	9.66e-16	Intron	PANTR1
cg10256405	2	104757817	rs77587929	2	105402393	0.1558	A	G	-0.09	-8.18	9.66e-16	Intron	PANTR1
cg10256405	2	104757817	rs651095	2	105402427	0.151	T	C	-0.09	-8.41	1.57e-16	Intron	PANTR1
cg10256405	2	104757817	rs647133	2	105402434	0.151	T	A	-0.09	-8.41	1.57e-16	Intron	PANTR1
cg10256405	2	104757817	rs452728	2	105402783	0.07359	A	G	-0.12	-8.76	9.5e-18	Intron	PANTR1
cg10256405	2	104757817	rs388599	2	105403069	0.151	C	A	-0.09	-8.41	1.57e-16	Intron	PANTR1
cg10256405	2	104757817	rs388630	2	105403102	0.151	G	A	-0.09	-8.41	1.57e-16	Intron	PANTR1
cg10256405	2	104757817	rs376358	2	105403135	0.151	A	G	-0.09	-8.41	1.57e-16	Intron	PANTR1
cg10256405	2	104757817	rs375567	2	105403319	0.151	A	G	-0.09	-8.41	1.57e-16	Intron	PANTR1
cg10256405	2	104757817	rs403683	2	105403399	0.151	C	T	-0.09	-8.41	1.57e-16	Intron	PANTR1
cg10256405	2	104757817	rs367493	2	105403422	0.151	A	T	-0.09	-8.41	1.57e-16	Intron	PANTR1
cg10256405	2	104757817	rs375383	2	105403579	0.151	C	T	-0.09	-8.41	1.57e-16	Intron	PANTR1
cg10256405	2	104757817	rs404600	2	105403749	0.1515	G	T	-0.09	-8.31	3.28e-16	Intron	PANTR1
cg10256405	2	104757817	rs396610	2	105403844	0.07413	T	C	-0.12	-8.62	2.98e-17	Intron	PANTR1
cg10256405	2	104757817	rs441792	2	105404221	0.1515	A	G	-0.09	-8.31	3.28e-16	Intron	PANTR1
cg10256405	2	104757817	rs409542	2	105404580	0.1504	C	A	-0.09	-8.3	3.72e-16	Intron	PANTR1
cg10256405	2	104757817	rs113406	2	105404617	0.1504	A	G	-0.09	-8.3	3.72e-16	Intron	PANTR1
cg10256405	2	104757817	rs445077	2	105404701	0.21	T	A	-0.06	-6.57	8.46e-11	Intron	PANTR1
cg10256405	2	104757817	rs435852	2	105404967	0.204	C	A	-0.06	-6.42	2.22e-10	Intron	PANTR1
cg10256405	2	104757817	rs446450	2	105405557	0.07143	A	G	-0.08	-5.65	2.08e-08	Intron	PANTR1
cg10256405	2	104757817	rs435454	2	105406549	0.07035	T	C	-0.09	-5.79	9.6e-09	Intron	PANTR1
cg10256405	2	104757817	rs6754968	2	105414479	0.1483	G	A	-0.06	-5.8	9.04e-09	Intron	PANTR1
cg10256405	2	104757817	rs7584419	2	105416123	0.1439	C	A	-0.06	-5.52	4.41e-08	Intron	PANTR1
cg10256405	2	104757817	rs11903299	2	105418292	0.1439	A	G	-0.06	-5.52	4.41e-08	Intron	PANTR1
cg10256405	2	104757817	rs7605876	2	105418422	0.1439	A	G	-0.06	-5.52	4.41e-08	Intron	PANTR1
cg10256405	2	104757817	rs1982412	2	105419161	0.1439	A	G	-0.06	-5.52	4.41e-08	Intron	PANTR1
cg10256405	2	104757817	rs1971202	2	105420001	0.1439	T	C	-0.06	-5.52	4.41e-08	Intron	PANTR1
cg10256405	2	104757817	rs1376612	2	105424953	0.1439	T	C	-0.06	-5.52	4.41e-08	Exon	PANTR1
cg10256405	2	104757817	rs1451532	2	105425626	0.07035	T	G	-0.09	-5.79	9.6e-09	Exon	PANTR1
cg10256405	2	104757817	rs6714455	2	105426101	0.1439	T	C	-0.06	-5.52	4.41e-08	Exon	PANTR1
cg10256405	2	104757817	rs6715082	2	105426617	0.1439	T	C	-0.06	-5.52	4.41e-08	Exon	PANTR1
cg10256405	2	104757817	rs6543271	2	105429867	0.1439	A	T	-0.06	-5.52	4.41e-08	Promoter	PANTR1
cg10256405	2	104757817	rs7590059	2	105430409	0.1439	G	A	-0.06	-5.52	4.41e-08	Promoter	PANTR1
cg10256405	2	104757817	rs4851716	2	105432142	0.2078	C	A	-0.05	-5.7	1.65e-08	Promoter	PANTR1
cg10256405	2	104757817	rs1868919	2	105432836	0.1439	A	G	-0.06	-5.52	4.41e-08	Promoter	PANTR1
cg10256405	2	104757817	rs1349512	2	105435369	0.1439	T	C	-0.06	-5.52	4.41e-08	Intron	PANTR1
cg10256405	2	104757817	rs1349511	2	105435516	0.1439	G	A	-0.06	-5.52	4.41e-08	Intron	PANTR1
cg10256405	2	104757817	rs4851718	2	105436048	0.1439	C	T	-0.06	-5.52	4.41e-08	Intron	PANTR1
cg10256405	2	104757817	rs4851719	2	105436084	0.1439	T	C	-0.06	-5.52	4.41e-08	Intron	PANTR1
cg10256405	2	104757817	rs80028645	2	105436464	0.03301	T	C	-0.13	-6.44	1.94e-10	Intron	PANTR1
cg10256405	2	104757817	rs6714493	2	105436880	0.1439	T	G	-0.06	-5.52	4.41e-08	Intron	PANTR1
cg10256405	2	104757817	rs11893470	2	105438001	0.1439	G	A	-0.06	-5.52	4.41e-08	Intron	PANTR1
cg10256405	2	104757817	rs4851720	2	105438986	0.1439	T	C	-0.06	-5.52	4.41e-08	Intron	PANTR1
cg10256405	2	104757817	rs7576970	2	105440266	0.1439	A	T	-0.06	-5.52	4.41e-08	Intron	PANTR1
cg10256405	2	104757817	rs7580154	2	105440501	0.1445	T	A	-0.06	-5.64	2.31e-08	Intron	PANTR1
cg10256405	2	104757817	rs7596328	2	105442170	0.2067	G	A	-0.05	-5.63	2.44e-08	Intron	PANTR1
cg10256405	2	104757817	rs4851722	2	105443048	0.07251	A	T	-0.09	-5.76	1.13e-08	Intron	PANTR1
cg10256405	2	104757817	rs7600984	2	105443953	0.07035	G	A	-0.09	-5.79	9.6e-09	Intron	PANTR1
cg10256405	2	104757817	rs7575379	2	105443971	0.07035	C	G	-0.09	-5.79	9.6e-09	Intron	PANTR1
cg10256405	2	104757817	rs12474218	2	105446792	0.07468	G	A	-0.09	-6.09	1.7e-09	Intron	PANTR1
cg10256405	2	104757817	rs12466387	2	105446873	0.1472	C	T	-0.06	-5.81	8.42e-09	Intron	PANTR1
cg10256405	2	104757817	rs1470756	2	105449455	0.07089	A	G	-0.09	-5.89	5.48e-09	Intron	PANTR1
cg10256405	2	104757817	rs4144777	2	105450373	0.07035	A	G	-0.09	-5.79	9.6e-09	Intron	PANTR1
cg10256405	2	104757817	rs4144780	2	105450550	0.07035	C	T	-0.09	-5.79	9.6e-09	Intron	PANTR1
cg10256405	2	104757817	rs4851723	2	105450813	0.07035	C	T	-0.09	-5.79	9.6e-09	Intron	PANTR1
cg10256405	2	104757817	rs11676582	2	105458002	0.07089	G	T	-0.09	-5.76	1.13e-08	Promoter	PANTR1
cg15685198	2	134406265	rs3791297	2	135163702	0.1039	A	T	0.19	8.2	7.93e-16	Intron	TMEM163
cg15685198	2	134406265	rs3791299	2	135165078	0.1006	T	C	0.19	7.96	5.18e-15	Intron	TMEM163
cg15685198	2	134406265	rs4954144	2	135165813	0.1088	T	G	0.2	9.1	5.3e-19	Intron	TMEM163
cg15685198	2	134406265	rs2118843	2	135167653	0.1077	T	C	0.2	8.89	3.04e-18	Intron	TMEM163
cg15685198	2	134406265	rs2043873	2	135167741	0.1239	G	A	0.16	7.55	1.04e-13	Intron	TMEM163
cg24799186	8	102776980	rs939408	3	46599079	0.1732	A	C	-0.07	-5.65	2.17e-08	Promoter	LRRC2-AS1
cg24799186	8	102776980	rs2280412	3	46600068	0.2256	A	G	-0.06	-5.55	3.8e-08	Promoter	LRRC2-AS1
cg24799186	8	102776980	rs6783573	3	46600520	0.1732	G	A	-0.07	-5.65	2.17e-08	Promoter	LRRC2-AS1
cg24799186	8	102776980	rs12185926	3	46602999	0.1748	G	C	-0.07	-5.82	7.98e-09	Intron	LRRC2-AS1
cg24799186	8	102776980	rs9822459	3	46603955	0.23	C	T	-0.06	-5.96	3.68e-09	Exon	LRRC2
cg24799186	8	102776980	rs2001441	3	46604376	0.1748	T	C	-0.07	-5.82	7.98e-09	Intron	LRRC2
cg24799186	8	102776980	rs2018033	3	46604430	0.23	A	G	-0.06	-5.96	3.68e-09	Intron	LRRC2
cg24799186	8	102776980	rs13096172	3	46612546	0.1753	A	G	-0.07	-5.83	7.82e-09	Intron	CRIPTO
cg24799186	8	102776980	rs3806703	3	46618501	0.1764	C	T	-0.07	-5.95	3.83e-09	Promoter	CRIPTO
cg24799186	8	102776980	rs1049667	3	46623690	0.1775	A	C	-0.07	-5.67	1.94e-08	Promoter	FAM240A
cg24799186	8	102776980	rs28771088	3	46679241	0.3555	A	G	-0.06	-6.37	3.04e-10	Distal Intergenic	FAM240A
cg24799186	8	102776980	rs4683255	3	46679881	0.3555	C	T	-0.06	-6.37	3.04e-10	Distal Intergenic	FAM240A
cg24799186	8	102776980	rs111743015	3	46684351	0.3458	A	G	-0.06	-6.24	6.69e-10	Distal Intergenic	FAM240A
cg24799186	8	102776980	rs7427959	3	46687030	0.349	G	A	-0.06	-6.64	5.44e-11	Distal Intergenic	ALS2CL
cg24799186	8	102776980	rs59903532	3	46691106	0.3452	T	C	-0.06	-6.08	1.72e-09	Intron	ALS2CL
cg24799186	8	102776980	rs56924247	3	46691338	0.3452	T	C	-0.06	-6.08	1.72e-09	Intron	ALS2CL
cg24799186	8	102776980	rs9861101	3	46692379	0.342	T	C	-0.06	-6.21	7.96e-10	Intron	ALS2CL
cg24799186	8	102776980	rs17079097	3	46696797	0.3512	C	T	-0.06	-6.23	6.91e-10	Intron	ALS2CL
cg24799186	8	102776980	rs55672827	3	46707645	0.2078	T	C	-0.09	-8.09	1.83e-15	Distal Intergenic	ALS2CL
cg24799186	8	102776980	rs3827495	3	46711507	0.401	T	C	0.05	5.54	3.92e-08	3' UTR	ALS2CL
cg24799186	8	102776980	rs11711074	3	46711563	0.3166	G	T	-0.1	-11.05	9.73e-27	3' UTR	ALS2CL
cg24799186	8	102776980	rs3210183	3	46711850	0.3144	A	G	-0.1	-11.17	2.9e-27	3' UTR	ALS2CL
cg24799186	8	102776980	rs6776565	3	46713102	0.3999	T	C	0.05	5.58	3.23e-08	Promoter	ALS2CL
cg24799186	8	102776980	rs7625303	3	46713457	0.3653	G	C	-0.09	-9.58	8.98e-21	Promoter	ALS2CL
cg24799186	8	102776980	rs61277784	3	46713764	0.3128	A	G	-0.1	-10.79	1.23e-25	Promoter	ALS2CL
cg24799186	8	102776980	rs3935248	3	46713865	0.3128	T	C	-0.1	-10.79	1.23e-25	Promoter	ALS2CL
cg24799186	8	102776980	rs13074065	3	46714496	0.4015	A	G	0.05	5.52	4.38e-08	Promoter	ALS2CL
cg24799186	8	102776980	rs11130103	3	46714797	0.4015	T	C	0.05	5.52	4.4e-08	Promoter	ALS2CL
cg24799186	8	102776980	rs11130104	3	46714821	0.4015	G	C	0.05	5.52	4.4e-08	Promoter	ALS2CL
cg24799186	8	102776980	rs4682825	3	46715001	0.3106	T	C	-0.1	-11.21	2e-27	Promoter	ALS2CL
cg24799186	8	102776980	rs55991232	3	46715646	0.3068	A	G	-0.1	-10.98	1.89e-26	Promoter	ALS2CL
cg24799186	8	102776980	rs7433347	3	46716523	0.2754	T	C	0.05	5.51	4.75e-08	Promoter	ALS2CL
cg24799186	8	102776980	rs7635360	3	46717065	0.4042	G	C	0.05	5.86	6.26e-09	Promoter	ALS2CL
cg24799186	8	102776980	rs6808525	3	46717931	0.2657	T	C	0.06	5.54	3.98e-08	Promoter	ALS2CL
cg24799186	8	102776980	rs9876451	3	46717957	0.2749	A	G	0.06	5.7	1.6e-08	Promoter	ALS2CL
cg24799186	8	102776980	rs6806400	3	46718298	0.2662	A	G	0.05	5.51	4.58e-08	Promoter	ALS2CL
cg24799186	8	102776980	rs62246183	3	46720260	0.3057	C	G	-0.11	-11.52	9.01e-29	Promoter	ALS2CL
cg24799186	8	102776980	rs9855064	3	46721028	0.3788	T	C	0.05	5.76	1.14e-08	Promoter	ALS2CL
cg24799186	8	102776980	rs9817508	3	46721211	0.381	G	A	0.05	5.82	8.34e-09	Promoter	ALS2CL
cg24799186	8	102776980	rs6803988	3	46721662	0.2982	T	C	0.06	6.08	1.79e-09	Promoter	ALS2CL
cg24799186	8	102776980	rs6792255	3	46722373	0.3084	T	C	-0.11	-11.66	2.2e-29	Exon	ALS2CL
cg24799186	8	102776980	rs4683310	3	46723551	0.3772	A	G	0.05	5.89	5.54e-09	3' UTR	ALS2CL
cg24799186	8	102776980	rs4683311	3	46723663	0.3766	T	C	0.06	6.05	2.12e-09	Intron	ALS2CL
cg24799186	8	102776980	rs56069285	3	46723777	0.3068	A	G	-0.11	-11.35	4.67e-28	Intron	ALS2CL
cg24799186	8	102776980	rs9847395	3	46724548	0.3831	T	C	0.06	6.12	1.42e-09	Intron	ALS2CL
cg24799186	8	102776980	rs9847407	3	46724569	0.3804	T	C	0.06	6.28	5.19e-10	Intron	ALS2CL
cg24799186	8	102776980	rs9810659	3	46725110	0.2976	A	G	0.06	5.67	1.96e-08	Intron	ALS2CL
cg24799186	8	102776980	rs9868213	3	46725120	0.2976	T	G	0.06	5.67	1.96e-08	Intron	ALS2CL
cg24799186	8	102776980	rs13073467	3	46727399	0.3977	T	G	0.06	6.64	5.38e-11	Promoter	ALS2CL
cg24799186	8	102776980	rs7373358	3	46728208	0.29	A	G	-0.12	-12.55	1.81e-33	Promoter	ALS2CL
cg24799186	8	102776980	rs7372799	3	46728240	0.3009	C	T	-0.12	-13.57	2.22e-38	Promoter	ALS2CL
cg24799186	8	102776980	rs7633016	3	46728659	0.3003	A	G	-0.12	-13.74	3.26e-39	Promoter	ALS2CL
cg24799186	8	102776980	rs7426833	3	46728904	0.3003	A	C	-0.12	-13.74	3.26e-39	Promoter	ALS2CL
cg24799186	8	102776980	rs7642448	3	46729757	0.2992	G	C	-0.12	-13.78	2.05e-39	Promoter	ALS2CL
cg24799186	8	102776980	rs12496585	3	46730063	0.2857	T	G	-0.12	-12.54	1.92e-33	Promoter	ALS2CL
cg24799186	8	102776980	rs6776464	3	46730580	0.2998	T	G	-0.12	-13.61	1.41e-38	Promoter	ALS2CL
cg24799186	8	102776980	rs4076927	3	46730749	0.2998	G	A	-0.12	-13.61	1.41e-38	Promoter	ALS2CL
cg24799186	8	102776980	rs7613489	3	46731303	0.2992	G	A	-0.12	-13.78	2.05e-39	Promoter	ALS2CL
cg24799186	8	102776980	rs7615747	3	46731524	0.3079	G	A	-0.12	-13.3	4.82e-37	Promoter	ALS2CL
cg24799186	8	102776980	rs13071203	3	46733589	0.3961	T	C	0.06	6.65	5.14e-11	Promoter	ALS2CL
cg24799186	8	102776980	rs11718902	3	46734441	0.3961	A	G	0.06	6.65	5.14e-11	Promoter	ALS2CL
cg24799186	8	102776980	rs11719061	3	46735098	0.3977	G	C	0.06	6.79	2e-11	Promoter	ALS2CL
cg24799186	8	102776980	rs6442020	3	46735645	0.2987	G	T	-0.13	-13.99	1.87e-40	Promoter	TMIE
cg24799186	8	102776980	rs34190208	3	46736217	0.2814	T	C	-0.12	-12.59	1.12e-33	Promoter	TMIE
cg24799186	8	102776980	rs7634963	3	46737979	0.2863	G	A	-0.12	-12.55	1.88e-33	Promoter	TMIE
cg24799186	8	102776980	rs72899368	3	46738817	0.06872	T	C	-0.1	-5.54	4.06e-08	Promoter	TMIE
cg24799186	8	102776980	rs6804514	3	46739139	0.2982	A	G	-0.12	-13.77	2.24e-39	Intron	TMIE
cg24799186	8	102776980	rs56670151	3	46739977	0.2846	G	A	-0.12	-12.57	1.42e-33	Promoter	TMIE
cg24799186	8	102776980	rs1272692308	3	46743895	0.3052	A	G	0.06	6.03	2.3e-09	Promoter	TMIE
cg24799186	8	102776980	rs55650397	3	46743934	0.3009	T	G	-0.13	-14.51	4.06e-43	Promoter	TMIE
cg24799186	8	102776980	rs7431776	3	46744134	0.3047	T	C	0.06	5.88	5.64e-09	Promoter	TMIE
cg24799186	8	102776980	rs7650366	3	46744966	0.3009	T	G	-0.13	-14.55	2.57e-43	Promoter	TMIE
cg24799186	8	102776980	rs7642783	3	46745396	0.3014	G	A	-0.13	-14.49	5.35e-43	Promoter	TMIE
cg24799186	8	102776980	rs73831197	3	46745994	0.3009	A	G	-0.13	-14.55	2.57e-43	Promoter	TMIE
cg24799186	8	102776980	rs749059400	3	46746006	0.3019	T	C	-0.13	-14.29	5.14e-42	Promoter	TMIE
cg24799186	8	102776980	rs71327088	3	46746150	0.3782	A	G	0.06	6.62	6.19e-11	Promoter	TMIE
cg24799186	8	102776980	rs7426919	3	46746975	0.3939	A	G	0.06	6.95	6.84e-12	Promoter	TMIE
cg24799186	8	102776980	rs59968076	3	46747157	0.1293	T	A	-0.1	-7.86	1.07e-14	Promoter	TMIE
cg24799186	8	102776980	rs7649081	3	46747192	0.2906	G	T	-0.12	-13.45	8.82e-38	Promoter	TMIE
cg24799186	8	102776980	rs7635402	3	46747255	0.1613	T	C	-0.1	-8.47	9.95e-17	Promoter	TMIE
cg24799186	8	102776980	rs73061887	3	46747866	0.1585	T	C	-0.1	-8.29	4.12e-16	Promoter	TMIE
cg24799186	8	102776980	rs59191033	3	46748004	0.3014	G	C	-0.13	-14.49	5.35e-43	Promoter	TMIE
cg24799186	8	102776980	rs12491225	3	46748453	0.3939	A	G	0.06	6.95	6.84e-12	Promoter	TMIE
cg24799186	8	102776980	rs6442022	3	46748712	0.3041	A	G	0.06	5.9	4.97e-09	Promoter	TMIE
cg24799186	8	102776980	rs7610936	3	46748897	0.2906	G	T	-0.12	-13.45	8.82e-38	Promoter	TMIE
cg24799186	8	102776980	rs7628174	3	46750202	0.1629	A	C	-0.11	-9.2	2.26e-19	Promoter	TMIE
cg24799186	8	102776980	rs11130106	3	46750553	0.395	A	G	0.06	6.87	1.19e-11	Intron	TMIE
cg24799186	8	102776980	rs57871952	3	46752798	0.1618	T	A	-0.1	-8.57	4.26e-17	Distal Intergenic	TMIE
cg24799186	8	102776980	rs7649029	3	46753355	0.3268	G	A	-0.12	-13.71	4.42e-39	Distal Intergenic	PRSS50
cg24799186	8	102776980	rs9815362	3	46753976	0.487	T	C	0.06	6.66	4.6e-11	Intron	PRSS50
cg24799186	8	102776980	rs58935080	3	46754286	0.1488	A	C	-0.1	-7.95	5.64e-15	Intron	PRSS50
cg24799186	8	102776980	rs56313683	3	46754737	0.2955	G	A	-0.12	-13.26	7.72e-37	Intron	PRSS50
cg24799186	8	102776980	rs73063653	3	46755005	0.1585	A	C	-0.1	-8.01	3.54e-15	Intron	PRSS50
cg24799186	8	102776980	rs73063655	3	46755296	0.1613	A	G	-0.09	-8.01	3.47e-15	Intron	PRSS50
cg24799186	8	102776980	rs12492868	3	46755937	0.243	T	C	-0.11	-11.41	2.69e-28	Exon	PRSS50
cg24799186	8	102776980	rs12492946	3	46756284	0.1602	G	C	-0.09	-7.84	1.25e-14	Intron	PRSS50
cg24799186	8	102776980	rs7616942	3	46756945	0.07846	T	A	-0.1	-5.79	9.76e-09	Promoter	PRSS50
cg24799186	8	102776980	rs34788938	3	46759010	0.2392	G	T	-0.11	-10.92	3.28e-26	Promoter	PRSS50
cg24799186	8	102776980	rs7642015	3	46759368	0.07955	G	C	-0.1	-6.06	1.99e-09	Promoter	PRSS50
cg24799186	8	102776980	rs62246210	3	46760403	0.2413	G	A	-0.11	-11.16	3.19e-27	Promoter	PRSS50
cg24799186	8	102776980	rs57987061	3	46761603	0.1629	A	G	-0.1	-8.25	5.57e-16	Promoter	PRSS50
cg24799186	8	102776980	rs55712958	3	46762688	0.1629	T	C	-0.1	-8.25	5.57e-16	Intron	PRSS50
cg24799186	8	102776980	rs7632176	3	46763839	0.164	A	G	-0.1	-8.27	4.49e-16	Intron	PRSS50
cg24799186	8	102776980	rs59539102	3	46764660	0.164	T	C	-0.1	-8.28	4.36e-16	Intron	PRSS50
cg24799186	8	102776980	rs116806835	3	46764662	0.1623	A	G	-0.09	-8.07	2.13e-15	Intron	PRSS50
cg24799186	8	102776980	rs59618012	3	46764663	0.164	T	G	-0.1	-8.28	4.36e-16	Intron	PRSS50
cg24799186	8	102776980	rs112244463	3	46764988	0.164	A	G	-0.1	-8.28	4.36e-16	Intron	PRSS50
cg24799186	8	102776980	rs66736629	3	46765277	0.164	T	C	-0.1	-8.28	4.36e-16	Intron	PRSS50
cg24799186	8	102776980	rs73063668	3	46765592	0.164	C	T	-0.1	-8.28	4.36e-16	Intron	PRSS50
cg24799186	8	102776980	rs56720140	3	46765886	0.07792	T	G	-0.1	-5.76	1.13e-08	Intron	PRSS50
cg24799186	8	102776980	rs55986901	3	46765924	0.2435	A	C	-0.11	-11.38	3.79e-28	Intron	PRSS50
cg24799186	8	102776980	rs56150912	3	46766058	0.164	A	G	-0.1	-8.28	4.36e-16	Intron	PRSS50
cg24799186	8	102776980	rs59529839	3	46766474	0.1667	T	C	-0.1	-8.34	2.65e-16	Intron	PRSS50
cg24799186	8	102776980	rs116634192	3	46766602	0.1596	C	T	-0.09	-7.9	8.2e-15	Intron	PRSS50
cg24799186	8	102776980	rs12485284	3	46767241	0.1629	A	G	-0.09	-8.08	2.06e-15	Intron	PRSS50
cg24799186	8	102776980	rs7623501	3	46768026	0.164	T	C	-0.1	-8.28	4.36e-16	Intron	PRSS50
cg24799186	8	102776980	rs7626129	3	46768474	0.164	T	C	-0.1	-8.28	4.36e-16	Intron	PRSS50
cg24799186	8	102776980	rs77707116	3	46768956	0.07792	A	C	-0.1	-5.76	1.13e-08	Intron	PRSS46P
cg24799186	8	102776980	rs60132352	3	46769004	0.164	C	A	-0.1	-8.28	4.36e-16	Intron	PRSS46P
cg24799186	8	102776980	rs60643068	3	46769652	0.1661	T	C	-0.1	-8.5	7.72e-17	Intron	PRSS46P
cg24799186	8	102776980	rs58137727	3	46769676	0.1661	C	G	-0.1	-8.5	7.72e-17	Intron	PRSS46P
cg24799186	8	102776980	rs72899400	3	46769732	0.1661	G	T	-0.1	-8.5	7.72e-17	Intron	PRSS46P
cg24799186	8	102776980	rs113064240	3	46769761	0.1661	T	C	-0.1	-8.5	7.72e-17	Intron	PRSS46P
cg24799186	8	102776980	rs61038123	3	46769794	0.1661	T	C	-0.1	-8.5	7.72e-17	Intron	PRSS46P
cg24799186	8	102776980	rs6442024	3	46770870	0.2446	C	T	-0.11	-11.4	2.97e-28	Intron	PRSS46P
cg24799186	8	102776980	rs73063682	3	46770884	0.1667	T	C	-0.1	-8.55	4.91e-17	Intron	PRSS46P
cg24799186	8	102776980	rs7632771	3	46771619	0.1667	C	T	-0.1	-8.55	4.91e-17	Intron	PRSS46P
cg24799186	8	102776980	rs7428736	3	46772878	0.1667	T	C	-0.1	-8.55	5.18e-17	Intron	PRSS46P
cg24799186	8	102776980	rs73063683	3	46773133	0.165	C	A	-0.1	-8.34	2.66e-16	Intron	PRSS46P
cg24799186	8	102776980	rs7428787	3	46773160	0.1667	T	C	-0.1	-8.55	5.18e-17	Intron	PRSS46P
cg24799186	8	102776980	rs59637204	3	46773510	0.1667	T	G	-0.1	-8.55	5.18e-17	Intron	PRSS46P
cg24799186	8	102776980	rs113174095	3	46773882	0.1667	A	C	-0.1	-8.55	5.18e-17	Intron	PRSS46P
cg24799186	8	102776980	rs55665753	3	46774378	0.2435	A	T	-0.11	-11.28	1.01e-27	Intron	PRSS46P
cg24799186	8	102776980	rs73063688	3	46774677	0.1667	A	G	-0.1	-8.55	5.18e-17	Intron	PRSS46P
cg24799186	8	102776980	rs7639979	3	46774776	0.1667	G	A	-0.1	-8.55	5.18e-17	Intron	PRSS46P
cg24799186	8	102776980	rs12489661	3	46775322	0.1667	G	A	-0.1	-8.55	5.18e-17	Promoter	PRSS46P
cg24799186	8	102776980	rs12489663	3	46775383	0.1661	G	A	-0.1	-8.54	5.7e-17	Promoter	PRSS46P
cg24799186	8	102776980	rs12496832	3	46775410	0.1661	A	G	-0.1	-8.54	5.7e-17	Promoter	PRSS46P
cg24799186	8	102776980	rs68175547	3	46775608	0.1667	G	A	-0.1	-8.55	5.18e-17	Promoter	PRSS46P
cg24799186	8	102776980	rs56208931	3	46775948	0.1667	T	G	-0.1	-8.55	5.18e-17	Promoter	PRSS46P
cg24799186	8	102776980	rs113877206	3	46776152	0.1667	T	C	-0.1	-8.55	5.18e-17	Promoter	PRSS46P
cg24799186	8	102776980	rs56752770	3	46776337	0.1347	C	T	-0.1	-7.5	1.48e-13	Promoter	PRSS46P
cg24799186	8	102776980	rs6793235	3	46777584	0.1337	T	C	-0.09	-7.23	9.94e-13	Promoter	PRSS46P
cg24799186	8	102776980	rs6793535	3	46777881	0.1353	G	C	-0.1	-7.33	5.11e-13	Promoter	PRSS46P
cg24799186	8	102776980	rs6808303	3	46777885	0.1353	C	T	-0.1	-7.33	5.11e-13	Promoter	PRSS46P
cg24799186	8	102776980	rs6793661	3	46778008	0.1358	T	C	-0.09	-7.28	6.93e-13	Promoter	PRSS46P
cg24799186	8	102776980	rs12492359	3	46778169	0.2116	G	A	-0.11	-10.14	5.61e-23	Promoter	PRSS46P
cg24799186	8	102776980	rs12492369	3	46778225	0.2116	G	A	-0.11	-10.14	5.61e-23	Promoter	PRSS46P
cg24799186	8	102776980	rs12486015	3	46778254	0.2116	A	G	-0.11	-10.14	5.61e-23	Promoter	PRSS46P
cg24799186	8	102776980	rs12486683	3	46778510	0.2105	T	C	-0.11	-10.16	4.81e-23	Promoter	PRSS46P
cg24799186	8	102776980	rs12493158	3	46778842	0.2105	G	A	-0.11	-10.16	4.81e-23	Promoter	PRSS46P
cg24799186	8	102776980	rs6763438	3	46778988	0.2105	C	T	-0.11	-10.16	4.81e-23	Promoter	PRSS46P
cg24799186	8	102776980	rs6414431	3	46779410	0.2105	C	A	-0.11	-10.16	4.81e-23	Promoter	PRSS46P
cg24799186	8	102776980	rs6414432	3	46779431	0.2105	G	A	-0.11	-10.16	4.81e-23	Promoter	PRSS46P
cg24799186	8	102776980	rs6442025	3	46779547	0.2105	C	A	-0.11	-10.16	4.81e-23	Promoter	PRSS46P
cg24799186	8	102776980	rs6797059	3	46779654	0.2105	C	T	-0.11	-10.16	4.81e-23	Promoter	PRSS46P
cg24799186	8	102776980	rs6442026	3	46779799	0.2105	T	G	-0.11	-10.16	4.81e-23	Promoter	PRSS46P
cg24799186	8	102776980	rs6794689	3	46779846	0.2105	G	A	-0.11	-10.16	4.81e-23	Promoter	PRSS46P
cg24799186	8	102776980	rs6782136	3	46779955	0.2105	T	C	-0.11	-10.16	4.81e-23	Promoter	PRSS46P
cg24799186	8	102776980	rs11294712	3	46780072	0.21	T	G	-0.11	-10.18	3.77e-23	Promoter	PRSS46P
cg24799186	8	102776980	rs6797748	3	46780303	0.2105	C	T	-0.11	-10.16	4.81e-23	Promoter	PRSS46P
cg24799186	8	102776980	rs6808374	3	46780424	0.2105	T	G	-0.11	-10.16	4.81e-23	Promoter	PRSS46P
cg24799186	8	102776980	rs58973116	3	46780547	0.2105	T	C	-0.11	-10.16	4.81e-23	Promoter	PRSS46P
cg24799186	8	102776980	rs6809112	3	46781151	0.2105	A	G	-0.11	-10.13	6.02e-23	Intron	PRSS46P
cg24799186	8	102776980	rs6801048	3	46781237	0.2089	A	T	-0.11	-9.96	3.03e-22	Intron	PRSS46P
cg24799186	8	102776980	rs61333746	3	46781282	0.2105	A	C	-0.11	-10.41	4.32e-24	Intron	PRSS46P
cg24799186	8	102776980	rs6803880	3	46781717	0.08333	C	T	-0.1	-6.05	2.11e-09	Intron	PRSS46P
cg24799186	8	102776980	rs62246232	3	46782000	0.08225	G	A	-0.1	-5.8	9.12e-09	Intron	PRSS46P
cg24799186	8	102776980	rs6789181	3	46782034	0.08333	G	C	-0.1	-6.05	2.11e-09	Intron	PRSS46P
cg24799186	8	102776980	rs6764144	3	46782155	0.08333	A	G	-0.1	-6.05	2.11e-09	Intron	PRSS46P
cg24799186	8	102776980	rs6801979	3	46782276	0.08333	G	A	-0.1	-6.05	2.11e-09	Intron	PRSS46P
cg24799186	8	102776980	rs74587973	3	46782352	0.1277	A	C	-0.09	-6.89	1.01e-11	Intron	PRSS46P
cg24799186	8	102776980	rs60461823	3	46783126	0.08333	T	C	-0.1	-6.05	2.11e-09	Intron	PRSS46P
cg24799186	8	102776980	rs6807680	3	46783229	0.08333	C	T	-0.1	-6.05	2.11e-09	Intron	PRSS46P
cg24799186	8	102776980	rs6805152	3	46783247	0.08333	C	A	-0.1	-6.05	2.11e-09	Intron	PRSS46P
cg24799186	8	102776980	rs6810260	3	46783432	0.08333	C	T	-0.1	-6.05	2.11e-09	Intron	PRSS46P
cg24799186	8	102776980	rs60294661	3	46783556	0.08333	T	C	-0.1	-6.05	2.11e-09	Intron	PRSS46P
cg24799186	8	102776980	rs59828146	3	46783629	0.08333	G	A	-0.1	-6.05	2.11e-09	Exon	PRSS46P
cg24799186	8	102776980	rs59721087	3	46783637	0.08333	C	T	-0.1	-6.05	2.11e-09	Exon	PRSS46P
cg24799186	8	102776980	rs57661142	3	46783757	0.08333	G	T	-0.1	-6.05	2.11e-09	Exon	PRSS46P
cg24799186	8	102776980	rs58830807	3	46783959	0.08333	C	T	-0.1	-6.05	2.11e-09	Exon	PRSS46P
cg24799186	8	102776980	rs58263848	3	46784133	0.08333	C	T	-0.1	-6.05	2.11e-09	Intron	PRSS46P
cg24799186	8	102776980	rs59804016	3	46784221	0.08333	C	T	-0.1	-6.05	2.11e-09	Intron	PRSS46P
cg24799186	8	102776980	rs60223148	3	46784318	0.08333	A	G	-0.1	-6.05	2.11e-09	Intron	PRSS46P
cg24799186	8	102776980	rs59859985	3	46784329	0.08333	A	G	-0.1	-6.05	2.11e-09	Intron	PRSS46P
cg24799186	8	102776980	rs61298367	3	46784352	0.08333	G	A	-0.1	-6.05	2.11e-09	Intron	PRSS46P
cg24799186	8	102776980	rs58943210	3	46784467	0.08333	A	G	-0.1	-6.05	2.11e-09	Exon	PRSS46P
cg24799186	8	102776980	rs62246251	3	46784580	0.08333	A	G	-0.1	-6.05	2.11e-09	Intron	PRSS46P
cg24799186	8	102776980	rs6799447	3	46784902	0.2186	T	C	-0.11	-10.54	1.3e-24	Intron	PRSS46P
cg24799186	8	102776980	rs4075011	3	46785131	0.08333	A	G	-0.1	-6.05	2.11e-09	Intron	PRSS46P
cg24799186	8	102776980	rs4075012	3	46785355	0.08496	C	T	-0.1	-6.34	3.49e-10	Intron	PRSS45P
cg24799186	8	102776980	rs62246253	3	46786453	0.0855	G	A	-0.1	-6.24	6.81e-10	Intron	PRSS45P
cg24799186	8	102776980	rs6442027	3	46787310	0.1331	T	C	-0.09	-7.15	1.76e-12	Intron	PRSS45P
cg24799186	8	102776980	rs62246254	3	46788095	0.08171	A	G	-0.09	-5.58	3.08e-08	Intron	PRSS45P
cg24799186	8	102776980	rs6777190	3	46789175	0.2186	G	A	-0.11	-10.47	2.66e-24	Intron	PRSS45P
cg24799186	8	102776980	rs7614762	3	46790397	0.2186	C	T	-0.11	-10.47	2.66e-24	Promoter	PRSS45P
cg24799186	8	102776980	rs60169344	3	46792304	0.08496	G	A	-0.1	-6.13	1.31e-09	Promoter	PRSS45P
cg24799186	8	102776980	rs56084632	3	46792524	0.08442	A	C	-0.1	-6.11	1.47e-09	Promoter	PRSS45P
cg24799186	8	102776980	rs62248376	3	46793945	0.08387	A	G	-0.1	-5.88	5.7e-09	Promoter	PRSS45P
cg24799186	8	102776980	rs62248377	3	46794170	0.08387	G	C	-0.1	-5.88	5.7e-09	Promoter	PRSS45P
cg24799186	8	102776980	rs58245995	3	46794409	0.08496	G	A	-0.1	-6.13	1.31e-09	Promoter	PRSS45P
cg24799186	8	102776980	rs59588744	3	46794416	0.08279	T	C	-0.1	-5.84	7.44e-09	Promoter	PRSS45P
cg24799186	8	102776980	rs59356397	3	46794643	0.08279	A	G	-0.1	-5.84	7.44e-09	Promoter	PRSS45P
cg24799186	8	102776980	rs57268847	3	46794745	0.08496	T	A	-0.1	-6.13	1.31e-09	Promoter	PRSS45P
cg24799186	8	102776980	rs61153905	3	46795062	0.08496	T	C	-0.1	-6.13	1.31e-09	Promoter	PRSS45P
cg24799186	8	102776980	rs771705632	3	46795237	0.08496	C	T	-0.1	-6.13	1.31e-09	Promoter	PRSS45P
cg24799186	8	102776980	rs62248384	3	46795770	0.08279	T	C	-0.1	-5.84	7.44e-09	Promoter	PRSS43P
cg24799186	8	102776980	rs62248385	3	46795879	0.08387	G	A	-0.1	-5.9	4.99e-09	Promoter	PRSS43P
cg24799186	8	102776980	rs6797122	3	46796636	0.08279	T	G	-0.1	-5.84	7.44e-09	Promoter	PRSS43P
cg24799186	8	102776980	rs6773559	3	46796789	0.08333	T	C	-0.1	-5.94	3.97e-09	Promoter	PRSS43P
cg24799186	8	102776980	rs6786453	3	46797086	0.08333	G	A	-0.1	-5.94	3.97e-09	Promoter	PRSS43P
cg24799186	8	102776980	rs7637019	3	46797840	0.08333	C	T	-0.1	-5.94	3.97e-09	Promoter	PRSS43P
cg24799186	8	102776980	rs7644977	3	46798133	0.08333	A	G	-0.1	-5.94	3.97e-09	Promoter	PRSS43P
cg24799186	8	102776980	rs7647424	3	46798378	0.08333	A	G	-0.1	-5.94	3.97e-09	Promoter	PRSS43P
cg24799186	8	102776980	rs113290270	3	46798749	0.08333	C	T	-0.1	-5.94	3.97e-09	Promoter	PRSS43P
cg24799186	8	102776980	rs113052232	3	46798830	0.08333	T	C	-0.1	-5.94	3.97e-09	Promoter	PRSS43P
cg24799186	8	102776980	rs6780988	3	46799316	0.08279	A	C	-0.1	-5.84	7.44e-09	Promoter	PRSS43P
cg24799186	8	102776980	rs75675315	3	46800100	0.08333	G	A	-0.1	-5.94	3.97e-09	Promoter	PRSS43P
cg24799186	8	102776980	rs6442028	3	46802435	0.08333	T	C	-0.1	-5.94	3.97e-09	Intron	PRSS43P
cg24799186	8	102776980	rs73065582	3	46803617	0.2154	T	A	-0.11	-10.23	2.48e-23	Intron	PRSS43P
cg24799186	8	102776980	rs56932277	3	46804509	0.2143	C	G	-0.11	-10.03	1.6e-22	Intron	PRSS43P
cg24799186	8	102776980	rs60399235	3	46804824	0.2154	C	T	-0.11	-10.23	2.48e-23	Intron	PRSS43P
cg24799186	8	102776980	rs61604377	3	46808072	0.07576	G	A	-0.1	-5.67	1.94e-08	Intron	PRSS43P
cg24799186	8	102776980	rs59180898	3	46808834	0.2137	C	T	-0.11	-9.75	1.87e-21	Intron	PRSS43P
cg24799186	8	102776980	rs73065590	3	46812987	0.1282	T	G	-0.09	-6.75	2.55e-11	Intron	PRSS43P
cg24799186	8	102776980	rs73065593	3	46812988	0.1282	T	C	-0.09	-6.75	2.55e-11	Intron	PRSS43P
cg24799186	8	102776980	rs112968591	3	46815290	0.1889	A	T	-0.11	-9.67	3.87e-21	Intron	PRSS43P
cg24799186	8	102776980	rs6806137	3	46822589	0.2137	G	T	-0.11	-9.75	1.87e-21	Intron	PRSS43P
cg24799186	8	102776980	rs200844021	3	46827775	0.2137	C	T	-0.11	-9.75	1.87e-21	Intron	PRSS44P
cg24799186	8	102776980	rs6768252	3	46840803	0.2143	T	C	-0.11	-10.08	9.37e-23	Intron	PRSS44P
cg24799186	8	102776980	rs6442035	3	46846814	0.2137	C	T	-0.11	-10.06	1.16e-22	Intron	PRSS44P
cg24799186	8	102776980	rs143862937	3	46847116	0.07468	G	A	-0.1	-5.74	1.3e-08	Intron	PRSS44P
cg24799186	8	102776980	rs57754146	3	46847936	0.2137	C	T	-0.11	-10.06	1.16e-22	Intron	PRSS44P
cg24799186	8	102776980	rs73067405	3	46849586	0.21	T	A	-0.1	-9.67	3.94e-21	Intron	PRSS44P
cg24799186	8	102776980	rs4569687	3	46855354	0.2197	G	A	-0.11	-10.56	1.07e-24	Promoter	PRSS50
cg24799186	8	102776980	rs4463002	3	46855957	0.2197	T	G	-0.11	-10.56	1.07e-24	Promoter	PRSS50
cg24799186	8	102776980	rs111972305	3	46857591	0.2408	C	T	-0.11	-10.9	4.11e-26	Distal Intergenic	PRSS50
cg24799186	8	102776980	rs60581222	3	46857913	0.2392	A	G	-0.1	-10.39	5.48e-24	Distal Intergenic	PRSS50
cg24799186	8	102776980	rs57986278	3	46858523	0.2386	A	C	-0.1	-10.38	5.82e-24	Distal Intergenic	PRSS50
cg24799186	8	102776980	rs6763563	3	46859698	0.2424	C	T	-0.11	-10.74	2.02e-25	Distal Intergenic	PRSS50
cg24799186	8	102776980	rs115277546	3	46860882	0.08333	T	G	-0.09	-5.6	2.84e-08	Distal Intergenic	PRSS50
cg24799186	8	102776980	rs149894450	3	46861826	0.08225	A	G	-0.09	-5.69	1.67e-08	Distal Intergenic	PRSS50
cg24799186	8	102776980	rs113134141	3	46861939	0.1564	G	A	-0.09	-7.63	5.85e-14	Distal Intergenic	PRSS50
cg24799186	8	102776980	rs6774027	3	46862874	0.2413	G	T	-0.11	-10.54	1.34e-24	Distal Intergenic	PRSS50
cg24799186	8	102776980	rs6774350	3	46863217	0.2413	C	T	-0.11	-10.54	1.34e-24	Distal Intergenic	PRSS50
cg24799186	8	102776980	rs6807818	3	46863329	0.2424	G	C	-0.11	-10.74	2.02e-25	Distal Intergenic	PRSS50
cg24799186	8	102776980	rs1187864927	3	46863671	0.08333	C	A	-0.09	-5.6	2.84e-08	Distal Intergenic	PRSS50
cg24799186	8	102776980	rs143362335	3	46864668	0.1558	A	C	-0.09	-7.63	6.05e-14	Distal Intergenic	PRSS50
cg24799186	8	102776980	rs6778207	3	46864771	0.2424	C	A	-0.11	-10.74	2.02e-25	Distal Intergenic	PRSS42P
cg24799186	8	102776980	rs114401515	3	46865159	0.1558	C	G	-0.09	-7.63	6.05e-14	Distal Intergenic	PRSS42P
cg24799186	8	102776980	rs6781694	3	46865826	0.2424	G	A	-0.11	-10.74	2.02e-25	Distal Intergenic	PRSS42P
cg24799186	8	102776980	rs6796502	3	46866866	0.1564	A	G	-0.09	-7.63	5.85e-14	Distal Intergenic	PRSS42P
cg24799186	8	102776980	rs74536477	3	46867063	0.08225	T	G	-0.09	-5.69	1.67e-08	Distal Intergenic	PRSS42P
cg24799186	8	102776980	rs151058971	3	46867395	0.08225	T	G	-0.09	-5.69	1.67e-08	Distal Intergenic	PRSS42P
cg24799186	8	102776980	rs7624422	3	46873667	0.2419	T	C	-0.11	-10.7	2.9e-25	Promoter	PRSS42P
cg24799186	8	102776980	rs7645877	3	46873718	0.2408	C	G	-0.11	-10.5	1.92e-24	Promoter	PRSS42P
cg24799186	8	102776980	rs60544005	3	46873822	0.07792	T	C	-0.09	-5.62	2.55e-08	Promoter	PRSS42P
cg24799186	8	102776980	rs7636089	3	46873957	0.2419	G	A	-0.11	-10.7	2.9e-25	Promoter	PRSS42P
cg24799186	8	102776980	rs73065118	3	46875716	0.1797	C	T	-0.08	-6.56	9.14e-11	Promoter	PRSS42P
cg24799186	8	102776980	rs12107311	3	46879831	0.2662	C	T	-0.1	-9.76	1.75e-21	Intron	PRSS42P
cg24799186	8	102776980	rs12107667	3	46880128	0.2624	G	A	-0.09	-9.44	2.96e-20	Intron	PRSS42P
cg24799186	8	102776980	rs12106917	3	46880140	0.2662	T	C	-0.1	-9.76	1.75e-21	Intron	PRSS42P
cg24799186	8	102776980	rs28493273	3	46881147	0.2657	A	G	-0.1	-9.58	8.79e-21	Intron	PRSS42P
cg24799186	8	102776980	rs112571943	3	46881488	0.2646	C	T	-0.09	-9.42	3.61e-20	Intron	PRSS42P
cg24799186	8	102776980	rs6800199	3	46881578	0.2657	G	A	-0.1	-9.58	8.79e-21	Intron	PRSS42P
cg24799186	8	102776980	rs112591351	3	46881700	0.2619	C	A	-0.09	-9.26	1.43e-19	Intron	PRSS42P
cg24799186	8	102776980	rs28440083	3	46881986	0.2657	G	A	-0.1	-9.58	8.79e-21	Intron	PRSS42P
cg24799186	8	102776980	rs28869819	3	46882415	0.2608	A	G	-0.09	-9.26	1.35e-19	Intron	PRSS42P
cg24799186	8	102776980	rs76547561	3	46882490	0.1109	T	A	-0.08	-5.54	3.96e-08	Intron	PRSS42P
cg24799186	8	102776980	rs6791251	3	46882660	0.2657	T	C	-0.1	-9.58	8.79e-21	Intron	PRSS42P
cg24799186	8	102776980	rs4683304	3	46884552	0.2646	T	C	-0.1	-9.59	8.28e-21	Intron	PRSS42P
cg24799186	8	102776980	rs12487126	3	46884882	0.1726	T	C	-0.08	-6.35	3.41e-10	Intron	PRSS42P
cg24799186	8	102776980	rs73833645	3	46887088	0.0855	G	A	-0.09	-5.64	2.29e-08	Intron	PRSS42P
cg24799186	8	102776980	rs113268519	3	46887509	0.2662	G	A	-0.1	-9.7	2.95e-21	Intron	PRSS42P
cg24799186	8	102776980	rs56387622	3	46888198	0.1775	C	T	-0.08	-6.41	2.38e-10	Intron	PRSS42P
cg24799186	8	102776980	rs67529903	3	46888471	0.1775	G	A	-0.08	-6.41	2.38e-10	Intron	PRSS42P
cg24799186	8	102776980	rs73065135	3	46888509	0.1775	C	G	-0.08	-6.41	2.38e-10	Intron	PRSS42P
cg24799186	8	102776980	rs6786689	3	46888668	0.1769	A	G	-0.08	-6.4	2.48e-10	Intron	PRSS42P
cg24799186	8	102776980	rs6787229	3	46889187	0.1775	A	G	-0.08	-6.41	2.38e-10	Intron	PRSS42P
cg24799186	8	102776980	rs57459864	3	46891310	0.263	C	G	-0.1	-9.57	9.33e-21	Intron	MYL3
cg24799186	8	102776980	rs61351097	3	46891337	0.1732	C	G	-0.08	-6.36	3.26e-10	Intron	MYL3
cg24799186	8	102776980	rs877670	3	46891474	0.263	G	A	-0.1	-9.57	9.33e-21	Intron	MYL3
cg24799186	8	102776980	rs1077216	3	46892161	0.171	T	C	-0.08	-6.22	7.68e-10	Intron	MYL3
cg24799186	8	102776980	rs67839338	3	46893126	0.2749	G	A	-0.1	-9.87	6.48e-22	Intron	MYL3
cg24799186	8	102776980	rs66668401	3	46894675	0.1737	C	T	-0.08	-6.31	4.45e-10	Intron	MYL3
cg24799186	8	102776980	rs73065147	3	46894939	0.1737	C	T	-0.08	-6.31	4.45e-10	Intron	MYL3
cg24799186	8	102776980	rs1869868	3	46894988	0.2619	C	A	-0.1	-9.67	3.78e-21	Intron	MYL3
cg24799186	8	102776980	rs6778660	3	46895300	0.1742	G	A	-0.08	-6.35	3.48e-10	Intron	MYL3
cg24799186	8	102776980	rs1456866489	3	46895333	0.1742	C	T	-0.08	-6.35	3.48e-10	Intron	MYL3
cg24799186	8	102776980	rs6768627	3	46895376	0.1742	T	C	-0.08	-6.35	3.48e-10	Intron	MYL3
cg24799186	8	102776980	rs6768845	3	46895615	0.1726	G	C	-0.08	-6.32	4.05e-10	Intron	MYL3
cg24799186	8	102776980	rs72895203	3	46895694	0.1715	C	T	-0.08	-6.33	3.87e-10	Intron	MYL3
cg24799186	8	102776980	rs1042973	3	46899516	0.2522	T	C	-0.09	-8.59	3.82e-17	3' UTR	MYL3
cg24799186	8	102776980	rs3729704	3	46900051	0.1813	A	G	-0.08	-6.72	3.12e-11	Intron	MYL3
cg24799186	8	102776980	rs2242118	3	46900585	0.1851	C	T	-0.08	-6.43	2.05e-10	Promoter	MYL3
cg24799186	8	102776980	rs1531136	3	46901654	0.2727	T	C	-0.09	-9.1	5.56e-19	Promoter	MYL3
cg24799186	8	102776980	rs2227294	3	46902129	0.3966	G	T	-0.05	-5.67	1.88e-08	Promoter	MYL3
cg24799186	8	102776980	rs3792557	3	46903043	0.1824	T	C	-0.08	-6.52	1.14e-10	Promoter	MYL3
cg24799186	8	102776980	rs3792558	3	46903094	0.2722	T	C	-0.09	-9	1.27e-18	Promoter	MYL3
cg24799186	8	102776980	rs936175	3	46904708	0.2727	A	C	-0.09	-9.01	1.14e-18	Promoter	MYL3
cg24799186	8	102776980	rs7633581	3	46906593	0.2744	T	C	-0.09	-9.15	3.53e-19	Promoter	MYL3
cg24799186	8	102776980	rs3762795	3	46907435	0.3966	G	A	-0.05	-5.7	1.63e-08	Promoter	MYL3
cg24799186	8	102776980	rs2385860	3	46910618	0.2792	C	A	-0.09	-8.7	1.51e-17	Intron	MYL3
cg24799186	8	102776980	rs7621046	3	46913337	0.4318	G	C	-0.06	-6.95	6.68e-12	Intron	PTH1R
cg24799186	8	102776980	rs11926707	3	46925539	0.4004	T	C	-0.05	-5.91	4.89e-09	Promoter	PTH1R
cg24799186	8	102776980	rs936184	3	46938247	0.428	A	C	-0.06	-6.43	2.05e-10	Intron	PTH1R
cg24799186	8	102776980	rs10049237	3	46941626	0.4313	T	C	-0.05	-6.23	7.18e-10	Promoter	PTH1R
cg24799186	8	102776980	rs7635480	3	46968227	0.454	C	T	0.05	5.82	8.09e-09	Intron	PTH1R
cg24799186	8	102776980	rs141040281	3	47006232	0.3247	A	G	-0.06	-6.24	6.79e-10	Intron	CCDC12
cg24799186	8	102776980	rs10433549	3	47031433	0.3377	T	C	-0.06	-6.44	1.9e-10	Promoter	NBEAL2
cg24799186	8	102776980	rs749511	3	47035735	0.3377	G	T	-0.06	-6.39	2.55e-10	Promoter	NBEAL2
cg24799186	8	102776980	rs749512	3	47035900	0.3371	T	C	-0.06	-6.38	2.73e-10	Promoter	NBEAL2
cg24799186	8	102776980	rs11720139	3	47036756	0.3377	G	C	-0.06	-6.39	2.55e-10	Promoter	NBEAL2
cg24799186	8	102776980	rs2305635	3	47043622	0.3377	A	G	-0.06	-6.39	2.55e-10	Promoter	NBEAL2
cg24799186	8	102776980	rs56217494	3	47048452	0.3382	G	T	-0.06	-6.43	2.02e-10	Promoter	NBEAL2
cg24799186	8	102776980	rs2278963	3	47054869	0.3382	A	C	-0.06	-6.43	2.02e-10	Promoter	NRADDP
cg24799186	8	102776980	rs17784127	3	47061700	0.3393	C	T	-0.06	-6.42	2.21e-10	Intron	NRADDP
cg24799186	8	102776980	rs55927279	3	47063465	0.3393	T	C	-0.06	-6.42	2.21e-10	Intron	NRADDP
cg24799186	8	102776980	rs55724164	3	47064713	0.3393	C	A	-0.06	-6.42	2.21e-10	Intron	NRADDP
cg24799186	8	102776980	rs6767218	3	47066003	0.3393	T	C	-0.06	-6.42	2.21e-10	Intron	NRADDP
cg24799186	8	102776980	rs62246398	3	47066203	0.3393	C	A	-0.06	-6.42	2.21e-10	Intron	NRADDP
cg24799186	8	102776980	rs56249396	3	47067396	0.3393	G	A	-0.06	-6.42	2.21e-10	Intron	NRADDP
cg24799186	8	102776980	rs60120622	3	47067837	0.3393	C	T	-0.06	-6.42	2.21e-10	Intron	NRADDP
cg24799186	8	102776980	rs140104856	3	47068989	0.3387	T	C	-0.06	-6.51	1.25e-10	Intron	NRADDP
cg24799186	8	102776980	rs146008124	3	47069054	0.3393	C	T	-0.06	-6.42	2.21e-10	Intron	NRADDP
cg24799186	8	102776980	rs11917361	3	47070497	0.3387	A	C	-0.06	-6.4	2.53e-10	Exon	NRADDP
cg24799186	8	102776980	rs11715121	3	47072621	0.3393	A	T	-0.06	-6.41	2.25e-10	Intron	SETD2
cg24799186	8	102776980	rs11713693	3	47074906	0.3393	C	T	-0.06	-6.43	2.1e-10	Intron	SETD2
cg24799186	8	102776980	rs11709660	3	47074927	0.3398	A	G	-0.06	-6.44	1.96e-10	Intron	SETD2
cg24799186	8	102776980	rs6768722	3	47079112	0.3398	G	A	-0.06	-6.44	1.96e-10	Intron	SETD2
cg24799186	8	102776980	rs9875235	3	47083621	0.3415	G	A	-0.06	-6.3	4.61e-10	Intron	SETD2
cg24799186	8	102776980	rs12715421	3	47084859	0.3398	A	G	-0.06	-6.44	1.96e-10	Intron	SETD2
cg24799186	8	102776980	rs7610620	3	47085690	0.3398	A	G	-0.06	-6.44	1.96e-10	Promoter	SETD2
cg24799186	8	102776980	rs9858443	3	47086048	0.3398	G	A	-0.06	-6.44	1.96e-10	Promoter	SETD2
cg24799186	8	102776980	rs4683322	3	47093189	0.3404	T	C	-0.06	-6.41	2.36e-10	Intron	SETD2
cg24799186	8	102776980	rs9854790	3	47101306	0.3485	T	G	-0.06	-6.23	7.27e-10	Intron	SETD2
cg24799186	8	102776980	rs9845728	3	47103376	0.3485	C	T	-0.06	-6.23	7.27e-10	Intron	SETD2
cg24799186	8	102776980	rs9844122	3	47108330	0.3479	C	T	-0.06	-6.17	1.05e-09	Promoter	SETD2
cg24799186	8	102776980	rs6777145	3	47110228	0.3479	T	G	-0.06	-6.17	1.05e-09	Promoter	SETD2
cg24799186	8	102776980	rs6442055	3	47110722	0.3479	A	G	-0.06	-6.17	1.05e-09	Promoter	SETD2
cg24799186	8	102776980	rs7633435	3	47114211	0.3479	A	G	-0.06	-6.17	1.05e-09	Intron	SETD2
cg24799186	8	102776980	rs7433300	3	47120640	0.3474	G	A	-0.06	-6.15	1.12e-09	Promoter	SETD2
cg24799186	8	102776980	rs6414435	3	47121140	0.3479	A	G	-0.06	-6.17	1.05e-09	Promoter	SETD2
cg24799186	8	102776980	rs12631730	3	47129903	0.3366	C	T	-0.06	-5.89	5.41e-09	Promoter	SETD2
cg24799186	8	102776980	rs6414436	3	47133172	0.3485	C	G	-0.06	-6.23	7.27e-10	Intron	SETD2
cg24799186	8	102776980	rs7623888	3	47134884	0.3485	T	C	-0.06	-6.23	7.27e-10	Intron	SETD2
cg24799186	8	102776980	rs4018905	3	47138170	0.3485	A	G	-0.06	-6.23	7.27e-10	Promoter	SETD2
cg24799186	8	102776980	rs9311403	3	47138878	0.3485	T	C	-0.06	-6.23	7.27e-10	Promoter	SETD2
cg24799186	8	102776980	rs11923706	3	47161214	0.3452	T	C	-0.06	-6.44	1.89e-10	Promoter	SETD2
cg24799186	8	102776980	rs6767907	3	47162661	0.3485	A	G	-0.06	-6.23	7.27e-10	Promoter	SETD2
cg24799186	8	102776980	rs6791062	3	47174343	0.3485	T	A	-0.06	-6.23	7.27e-10	Intron	SETD2
cg24799186	8	102776980	rs12493425	3	47176946	0.3485	T	G	-0.06	-6.23	7.27e-10	Intron	SETD2
cg24799186	8	102776980	rs9837343	3	47177388	0.3485	G	A	-0.06	-6.23	7.27e-10	Intron	SETD2
cg24799186	8	102776980	rs9812878	3	47182787	0.3479	T	C	-0.06	-6.21	7.79e-10	Intron	SETD2
cg24799186	8	102776980	rs11719738	3	47186085	0.3479	T	A	-0.06	-6.25	6.09e-10	Intron	SETD2
cg24799186	8	102776980	rs6442059	3	47187075	0.3479	C	G	-0.06	-6.25	6.09e-10	Intron	SETD2
cg24799186	8	102776980	rs6442060	3	47192764	0.336	A	T	-0.06	-5.92	4.56e-09	Intron	SETD2
cg24799186	8	102776980	rs9818382	3	47193034	0.3479	C	T	-0.06	-6.25	6.09e-10	Intron	SETD2
cg24799186	8	102776980	rs9843075	3	47195630	0.3377	A	G	-0.06	-5.95	3.82e-09	Intron	SETD2
cg24799186	8	102776980	rs6766230	3	47196209	0.3479	C	A	-0.06	-6.25	6.09e-10	Intron	SETD2
cg24799186	8	102776980	rs9821119	3	47198437	0.3479	C	G	-0.06	-6.25	6.09e-10	Intron	SETD2
cg24799186	8	102776980	rs6442061	3	47203783	0.3479	G	T	-0.06	-6.25	6.09e-10	Promoter	SETD2
cg24799186	8	102776980	rs1811652	3	47208698	0.3479	G	C	-0.06	-6.25	6.09e-10	Promoter	KIF9-AS1
cg24799186	8	102776980	rs148710154	3	47208986	0.3479	C	T	-0.06	-6.25	6.09e-10	Promoter	KIF9-AS1
cg24799186	8	102776980	rs62246451	3	47211632	0.3479	T	C	-0.06	-6.25	6.09e-10	Intron	KIF9-AS1
cg24799186	8	102776980	rs59299766	3	47213724	0.336	A	G	-0.06	-5.92	4.56e-09	Intron	KIF9-AS1
cg24799186	8	102776980	rs7620997	3	47214122	0.3469	T	C	-0.06	-6.15	1.15e-09	Intron	KIF9-AS1
cg24799186	8	102776980	rs11714373	3	47214817	0.3474	A	G	-0.06	-6.16	1.07e-09	Intron	KIF9-AS1
cg24799186	8	102776980	rs56013261	3	47224014	0.3474	T	C	-0.06	-6.16	1.07e-09	Intron	KIF9-AS1
cg24799186	8	102776980	rs58956475	3	47224615	0.3474	C	G	-0.06	-6.16	1.07e-09	Intron	KIF9-AS1
cg24799186	8	102776980	rs140216924	3	47227516	0.3366	G	C	-0.06	-5.86	6.27e-09	Intron	KIF9-AS1
cg24799186	8	102776980	rs62246455	3	47233621	0.3474	A	T	-0.06	-6.16	1.07e-09	Intron	KIF9-AS1
cg24799186	8	102776980	rs6781941	3	47234158	0.3479	A	G	-0.06	-6.11	1.49e-09	Intron	KIF9-AS1
cg24799186	8	102776980	rs6773521	3	47234419	0.3479	G	A	-0.06	-6.11	1.49e-09	Intron	KIF9-AS1
cg24799186	8	102776980	rs940881524	3	47238372	0.3366	G	T	-0.06	-5.86	6.27e-09	Intron	KIF9-AS1
cg24799186	8	102776980	rs57756484	3	47239333	0.3479	G	A	-0.06	-6.11	1.49e-09	Intron	KIF9-AS1
cg24799186	8	102776980	rs1466740	3	47245883	0.3474	T	C	-0.06	-6.16	1.07e-09	Intron	KIF9-AS1
cg24799186	8	102776980	rs1466741	3	47247214	0.3474	T	C	-0.06	-6.16	1.07e-09	Intron	KIF9-AS1
cg24799186	8	102776980	rs11920354	3	47262246	0.3474	A	C	-0.06	-6.16	1.07e-09	Intron	SNORD13J
cg24799186	8	102776980	rs7632501	3	47268306	0.3479	C	T	-0.06	-6.12	1.39e-09	Intron	SNORD13J
cg24799186	8	102776980	rs62248905	3	47274082	0.3474	G	A	-0.06	-6.16	1.07e-09	Intron	SNORD13J
cg24799186	8	102776980	rs56250009	3	47279497	0.3479	C	G	-0.06	-6.11	1.49e-09	Intron	SNORD13J
cg24799186	8	102776980	rs2088135	3	47280018	0.3479	C	T	-0.06	-6.11	1.49e-09	Exon	SNORD13J
cg24799186	8	102776980	rs73069104	3	47280733	0.3469	C	T	-0.06	-6.15	1.15e-09	Intron	SNORD13J
cg24799186	8	102776980	rs61386020	3	47285522	0.336	T	C	-0.06	-5.92	4.56e-09	Exon	SNORD13J
cg24799186	8	102776980	rs11921117	3	47294000	0.3544	C	T	-0.06	-6.43	2.09e-10	Promoter	SNORD13J
cg24799186	8	102776980	rs6768221	3	47296899	0.3474	G	C	-0.06	-6.16	1.07e-09	Intron	SNORD13J
cg24799186	8	102776980	rs539590773	3	47297835	0.3474	C	A	-0.06	-6.16	1.07e-09	Intron	SNORD13J
cg24799186	8	102776980	rs79492808	3	47302200	0.336	A	G	-0.06	-5.92	4.56e-09	Intron	KIF9
cg24799186	8	102776980	rs11130126	3	47306894	0.3485	G	A	-0.06	-6.22	7.76e-10	Promoter	KIF9
cg24799186	8	102776980	rs11920853	3	47308183	0.3485	A	G	-0.06	-6.22	7.76e-10	Promoter	KIF9
cg24799186	8	102776980	rs11915074	3	47309757	0.3485	T	A	-0.06	-6.22	7.76e-10	Promoter	KIF9
cg24799186	8	102776980	rs61306046	3	47311153	0.3485	G	T	-0.06	-6.22	7.76e-10	Intron	KIF9
cg24799186	8	102776980	rs58472056	3	47311154	0.3485	C	T	-0.06	-6.22	7.76e-10	Intron	KIF9
cg24799186	8	102776980	rs10490798	3	47328744	0.3344	T	C	-0.06	-5.86	6.46e-09	Exon	KIF9
cg24799186	8	102776980	rs11720439	3	47347003	0.3452	G	T	-0.06	-6.27	5.61e-10	Intron	KIF9
cg24799186	8	102776980	rs11710121	3	47351501	0.3452	G	T	-0.06	-6.27	5.61e-10	Intron	KIF9
cg24799186	8	102776980	rs17410853	3	47363971	0.3452	T	G	-0.06	-6.27	5.61e-10	Intron	KIF9
cg24799186	8	102776980	rs2240796	3	47380499	0.3312	G	C	-0.06	-5.85	6.7e-09	Intron	PTPN23
cg17124293	10	44908533	rs564325545	4	37496354	0.006494	G	A	-0.48	-5.52	4.36e-08	Intron	LOC124900691
cg16855355	4	184347973	rs181401980	4	118589501	0.01353	G	C	0.17	5.67	1.88e-08	Intron	LINC01378
cg16855355	4	184347973	rs555977746	4	118603459	0.01353	G	C	0.17	5.67	1.88e-08	Intron	LINC01378
cg27410726	6	166487293	rs1044059	6	167369897	0.3696	C	A	0.08	6.2	8.41e-10	Promoter	RNASET2
cg27410726	6	166487293	rs34203453	6	167370211	0.4594	A	C	0.07	5.58	3.11e-08	Promoter	RNASET2
cg27410726	6	166487293	rs2757039	6	167370353	0.4605	G	T	0.07	5.63	2.37e-08	Promoter	RNASET2
cg27410726	6	166487293	rs2757041	6	167370532	0.4545	C	G	0.07	5.6	2.81e-08	Promoter	RNASET2
cg27410726	6	166487293	rs2149083	6	167370971	0.3696	G	C	0.08	6.17	1.01e-09	Promoter	RNASET2
cg27410726	6	166487293	rs2149084	6	167370988	0.369	G	C	0.08	6.09	1.61e-09	Promoter	RNASET2
cg27410726	6	166487293	rs2769346	6	167370999	0.3696	A	G	0.08	6.17	1.01e-09	Promoter	RNASET2
cg27410726	6	166487293	rs2149085	6	167371110	0.3696	T	C	0.08	6.17	1.01e-09	Promoter	RNASET2
cg27410726	6	166487293	rs2769347	6	167371737	0.369	T	A	0.08	6.28	5.14e-10	Promoter	RNASET2
cg27410726	6	166487293	rs2757044	6	167371846	0.368	C	G	0.08	6.36	3.22e-10	Promoter	RNASET2
cg27410726	6	166487293	rs2769348	6	167372186	0.369	A	G	0.08	6.28	5.14e-10	Promoter	RNASET2
cg27410726	6	166487293	rs2149090	6	167372764	0.369	T	C	0.08	6.28	5.14e-10	Promoter	RNASET2
cg27410726	6	166487293	rs2149091	6	167372786	0.369	C	T	0.08	6.28	5.14e-10	Promoter	RNASET2
cg27410726	6	166487293	rs2149092	6	167372978	0.369	C	T	0.08	6.28	5.14e-10	Promoter	RNASET2
cg27410726	6	166487293	rs1819333	6	167373547	0.369	T	G	0.08	6.28	5.14e-10	Promoter	RNASET2
cg27410726	6	166487293	rs2013815	6	167373812	0.369	T	A	0.08	6.28	5.14e-10	Distal Intergenic	RNASET2
cg27410726	6	166487293	rs2769349	6	167374119	0.369	G	A	0.08	6.28	5.14e-10	Distal Intergenic	RNASET2
cg27410726	6	166487293	rs4710147	6	167374239	0.369	G	A	0.08	6.28	5.14e-10	Distal Intergenic	RNASET2
cg27410726	6	166487293	rs2757046	6	167374353	0.369	C	T	0.08	6.28	5.14e-10	Distal Intergenic	RNASET2
cg27410726	6	166487293	rs2757047	6	167374489	0.369	C	T	0.08	6.28	5.14e-10	Distal Intergenic	RNASET2
cg27410726	6	166487293	rs1187530	6	167376812	0.369	C	T	0.08	6.28	5.14e-10	Distal Intergenic	RNASET2
cg27410726	6	166487293	rs2757050	6	167377165	0.369	G	T	0.08	6.28	5.14e-10	Distal Intergenic	RNASET2
cg27410726	6	166487293	rs1590257	6	167377782	0.369	G	T	0.08	6.28	5.14e-10	Distal Intergenic	RNASET2
cg27410726	6	166487293	rs2769351	6	167378568	0.3712	A	G	0.08	6.33	3.93e-10	Distal Intergenic	RNASET2
cg27410726	6	166487293	rs6939196	6	167378988	0.369	C	T	0.08	6.28	5.14e-10	Distal Intergenic	RNASET2
cg27410726	6	166487293	rs12055488	6	167379570	0.46	A	G	0.07	5.72	1.42e-08	Distal Intergenic	RNASET2
cg27410726	6	166487293	rs2769354	6	167379771	0.369	G	T	0.08	6.28	5.14e-10	Distal Intergenic	RNASET2
cg27410726	6	166487293	rs2757052	6	167380174	0.369	T	C	0.08	6.28	5.14e-10	Distal Intergenic	RNASET2
cg27410726	6	166487293	rs2757053	6	167380338	0.46	A	C	0.07	5.72	1.42e-08	Distal Intergenic	RNASET2
cg27410726	6	166487293	rs2769355	6	167380493	0.369	G	A	0.08	6.28	5.14e-10	Distal Intergenic	RNASET2
cg27410726	6	166487293	rs2757054	6	167380501	0.369	A	G	0.08	6.28	5.14e-10	Distal Intergenic	RNASET2
cg27410726	6	166487293	rs2015864	6	167381476	0.369	T	C	0.08	6.28	5.14e-10	Distal Intergenic	RNASET2
cg27410726	6	166487293	rs1211447	6	167381979	0.369	T	C	0.08	6.28	5.14e-10	Distal Intergenic	RNASET2
cg27410726	6	166487293	rs1187532	6	167382020	0.369	A	G	0.08	6.28	5.14e-10	Distal Intergenic	RNASET2
cg27410726	6	166487293	rs3963512	6	167382274	0.46	G	A	0.07	5.72	1.42e-08	Distal Intergenic	RNASET2
cg27410726	6	166487293	rs434093	6	167382449	0.369	C	T	0.08	6.28	5.14e-10	Distal Intergenic	RNASET2
cg27410726	6	166487293	rs448060	6	167382622	0.369	G	A	0.08	6.28	5.14e-10	Distal Intergenic	RNASET2
cg27410726	6	166487293	rs9355610	6	167383075	0.46	G	A	0.07	5.72	1.42e-08	Distal Intergenic	RNASET2
cg27410726	6	166487293	rs364283	6	167383750	0.369	T	C	0.08	6.28	5.14e-10	Intron	RNASET2
cg27410726	6	166487293	rs429083	6	167383972	0.369	C	T	0.08	6.28	5.14e-10	Intron	RNASET2
cg27410726	6	166487293	rs365189	6	167384545	0.369	A	G	0.08	6.28	5.14e-10	Intron	RNASET2
cg27410726	6	166487293	rs376551	6	167384923	0.369	A	G	0.08	6.28	5.14e-10	Intron	RNASET2
cg27410726	6	166487293	rs386548	6	167385533	0.369	A	T	0.08	6.28	5.14e-10	Intron	RNASET2
cg27410726	6	166487293	rs1130033	6	167385623	0.46	T	C	0.07	5.72	1.42e-08	Intron	RNASET2
cg27410726	6	166487293	rs402749	6	167386104	0.369	T	C	0.08	6.28	5.14e-10	Intron	RNASET2
cg27410726	6	166487293	rs4710149	6	167386346	0.46	T	C	0.07	5.72	1.42e-08	Intron	RNASET2
cg27410726	6	166487293	rs400063	6	167386592	0.369	T	C	0.08	6.28	5.14e-10	Intron	RNASET2
cg27410726	6	166487293	rs385863	6	167386615	0.369	G	C	0.08	6.28	5.14e-10	Intron	RNASET2
cg27410726	6	166487293	rs397713	6	167386714	0.369	A	G	0.08	6.28	5.14e-10	Intron	RNASET2
cg27410726	6	166487293	rs7750593	6	167387359	0.46	C	G	0.07	5.72	1.42e-08	Intron	RNASET2
cg27410726	6	166487293	rs453184	6	167387404	0.369	C	A	0.08	6.28	5.14e-10	Intron	RNASET2
cg27410726	6	166487293	rs436707	6	167388843	0.3696	C	T	0.08	6.33	3.8e-10	Intron	RNASET2
cg27410726	6	166487293	rs1794700	6	167389103	0.3696	T	C	0.08	6.33	3.8e-10	Intron	RNASET2
cg27410726	6	166487293	rs442298	6	167389452	0.3696	C	G	0.08	6.33	3.8e-10	Intron	RNASET2
cg27410726	6	166487293	rs377753	6	167389496	0.3696	T	A	0.08	6.33	3.8e-10	Intron	RNASET2
cg27410726	6	166487293	rs430477	6	167389851	0.3696	C	T	0.08	6.33	3.8e-10	Intron	RNASET2
cg27410726	6	166487293	rs443570	6	167389925	0.3696	A	G	0.08	6.33	3.8e-10	Intron	RNASET2
cg27410726	6	166487293	rs376574	6	167389956	0.3696	T	A	0.08	6.33	3.8e-10	Intron	RNASET2
cg27410726	6	166487293	rs444210	6	167390242	0.4605	G	A	0.07	5.73	1.38e-08	Intron	RNASET2
cg27410726	6	166487293	rs439553	6	167391212	0.3696	G	A	0.08	6.33	3.8e-10	Intron	MIR3939
cg27410726	6	166487293	rs439237	6	167391392	0.3696	G	A	0.08	6.33	3.8e-10	Intron	MIR3939
cg27410726	6	166487293	rs9457247	6	167392174	0.3696	T	C	0.08	6.33	3.8e-10	Intron	MIR3939
cg27410726	6	166487293	rs9459827	6	167392204	0.3696	T	A	0.08	6.33	3.8e-10	Intron	MIR3939
cg27410726	6	166487293	rs1794699	6	167393395	0.3696	C	G	0.08	6.33	3.8e-10	Intron	MIR3939
cg27410726	6	166487293	rs1743439	6	167393407	0.3696	T	C	0.08	6.33	3.8e-10	Intron	MIR3939
cg27410726	6	166487293	rs13192426	6	167393848	0.369	G	A	0.08	6.31	4.21e-10	Intron	MIR3939
cg27410726	6	166487293	rs5020533	6	167394177	0.3685	C	T	0.08	6.22	7.56e-10	Intron	MIR3939
cg27410726	6	166487293	rs1620933	6	167394243	0.3696	G	A	0.08	6.33	3.8e-10	Intron	MIR3939
cg27410726	6	166487293	rs4710154	6	167394634	0.4605	A	T	0.07	5.77	1.07e-08	Intron	MIR3939
cg27410726	6	166487293	rs405553	6	167395058	0.3696	G	A	0.08	6.33	3.8e-10	Intron	MIR3939
cg27410726	6	166487293	rs415987	6	167395375	0.3696	A	G	0.08	6.33	3.8e-10	Intron	MIR3939
cg27410726	6	166487293	rs1794697	6	167395410	0.3696	T	C	0.08	6.33	3.8e-10	Intron	MIR3939
cg27410726	6	166487293	rs414437	6	167396119	0.3696	G	A	0.08	6.33	3.8e-10	Intron	MIR3939
cg27410726	6	166487293	rs421214	6	167396629	0.3696	G	A	0.08	6.33	3.8e-10	Intron	MIR3939
cg27410726	6	166487293	rs422094	6	167397033	0.3696	G	C	0.08	6.33	3.8e-10	Intron	MIR3939
cg27410726	6	166487293	rs393558	6	167397750	0.3696	C	A	0.08	6.33	3.8e-10	Intron	MIR3939
cg27410726	6	166487293	rs436625	6	167398345	0.3696	A	C	0.08	6.33	3.8e-10	Intron	MIR3939
cg27410726	6	166487293	rs393727	6	167398632	0.3696	A	T	0.08	6.33	3.8e-10	Intron	MIR3939
cg27410726	6	166487293	rs408040	6	167398903	0.3696	T	A	0.08	6.33	3.8e-10	Intron	MIR3939
cg27410726	6	166487293	rs408087	6	167398952	0.3696	T	C	0.08	6.33	3.8e-10	Intron	MIR3939
cg27410726	6	166487293	rs408918	6	167399282	0.3696	T	G	0.08	6.33	3.8e-10	Intron	MIR3939
cg27410726	6	166487293	rs9366078	6	167399512	0.4605	A	G	0.07	5.77	1.07e-08	Intron	MIR3939
cg27410726	6	166487293	rs9356551	6	167400345	0.4605	T	C	0.07	5.77	1.07e-08	Intron	MIR3939
cg27410726	6	166487293	rs413232	6	167400972	0.3696	A	G	0.08	6.33	3.8e-10	Intron	MIR3939
cg27410726	6	166487293	rs1951459	6	167402536	0.4605	G	A	0.07	5.77	1.07e-08	Intron	MIR3939
cg27410726	6	166487293	rs86755	6	167403108	0.3696	C	T	0.08	6.33	3.8e-10	Intron	MIR3939
cg27410726	6	166487293	rs382009	6	167403121	0.3696	C	G	0.08	6.33	3.8e-10	Intron	MIR3939
cg27410726	6	166487293	rs428805	6	167403132	0.3696	A	C	0.08	6.33	3.8e-10	Intron	MIR3939
cg27410726	6	166487293	rs2345571	6	167403400	0.3696	G	T	0.08	6.33	3.8e-10	Intron	MIR3939
cg27410726	6	166487293	rs1811123	6	167403443	0.3696	C	T	0.08	6.33	3.8e-10	Intron	MIR3939
cg27410726	6	166487293	rs2345573	6	167403480	0.3696	G	C	0.08	6.33	3.8e-10	Intron	MIR3939
cg27410726	6	166487293	rs4997107	6	167403485	0.3696	T	C	0.08	6.33	3.8e-10	Intron	MIR3939
cg27410726	6	166487293	rs67961855	6	167403538	0.3696	C	T	0.08	6.33	3.8e-10	Intron	MIR3939
cg27410726	6	166487293	rs1811121	6	167403539	0.3696	C	T	0.08	6.33	3.8e-10	Intron	MIR3939
cg27410726	6	166487293	rs933243	6	167403873	0.4605	C	A	0.07	5.77	1.07e-08	Intron	MIR3939
cg27410726	6	166487293	rs385460	6	167403888	0.3696	T	A	0.08	6.33	3.8e-10	Intron	MIR3939
cg27410726	6	166487293	rs385113	6	167403971	0.3696	G	A	0.08	6.33	3.8e-10	Intron	MIR3939
cg27410726	6	166487293	rs932644	6	167404187	0.3696	C	A	0.08	6.33	3.8e-10	Intron	MIR3939
cg27410726	6	166487293	rs10946198	6	167404432	0.3696	T	C	0.08	6.33	3.8e-10	Intron	MIR3939
cg27410726	6	166487293	rs10946199	6	167404492	0.3696	A	G	0.08	6.33	3.8e-10	Intron	MIR3939
cg27410726	6	166487293	rs1743440	6	167404606	0.3696	A	G	0.08	6.33	3.8e-10	Intron	MIR3939
cg27410726	6	166487293	rs1743441	6	167404689	0.3696	G	A	0.08	6.33	3.8e-10	Intron	MIR3939
cg27410726	6	166487293	rs1794694	6	167404751	0.3696	C	T	0.08	6.33	3.8e-10	Intron	MIR3939
cg27410726	6	166487293	rs430293	6	167404958	0.3696	G	A	0.08	6.33	3.8e-10	Intron	MIR3939
cg27410726	6	166487293	rs430097	6	167405073	0.3696	G	A	0.08	6.33	3.8e-10	Intron	MIR3939
cg27410726	6	166487293	rs9347170	6	167405187	0.4605	C	T	0.07	5.77	1.07e-08	Intron	MIR3939
cg27410726	6	166487293	rs409356	6	167405226	0.3696	A	T	0.08	6.33	3.8e-10	Intron	MIR3939
cg27410726	6	166487293	rs447042	6	167405435	0.3696	T	C	0.08	6.33	3.8e-10	Intron	MIR3939
cg27410726	6	166487293	rs402191	6	167405553	0.3696	C	T	0.08	6.33	3.8e-10	Intron	MIR3939
cg27410726	6	166487293	rs1794693	6	167405670	0.3696	C	T	0.08	6.33	3.8e-10	Intron	MIR3939
cg27410726	6	166487293	rs67178997	6	167405887	0.3696	A	T	0.08	6.33	3.8e-10	Intron	MIR3939
cg27410726	6	166487293	rs401260	6	167405888	0.3696	C	T	0.08	6.33	3.8e-10	Intron	MIR3939
cg27410726	6	166487293	rs422694	6	167406074	0.3696	T	G	0.08	6.33	3.8e-10	Intron	MIR3939
cg27410726	6	166487293	rs422780	6	167406209	0.3696	G	A	0.08	6.33	3.8e-10	Intron	MIR3939
cg27410726	6	166487293	rs400176	6	167406238	0.3696	C	T	0.08	6.33	3.8e-10	Intron	MIR3939
cg27410726	6	166487293	rs422562	6	167406318	0.3696	G	A	0.08	6.33	3.8e-10	Intron	MIR3939
cg27410726	6	166487293	rs416131	6	167406544	0.3696	T	G	0.08	6.33	3.8e-10	Intron	MIR3939
cg27410726	6	166487293	rs415890	6	167406633	0.3696	C	G	0.08	6.33	3.8e-10	Intron	MIR3939
cg27410726	6	166487293	rs415842	6	167406681	0.3696	A	G	0.08	6.33	3.8e-10	Intron	MIR3939
cg27410726	6	166487293	rs389956	6	167407254	0.3696	G	T	0.08	6.33	3.8e-10	Intron	MIR3939
cg27410726	6	166487293	rs389946	6	167407268	0.3696	C	T	0.08	6.33	3.8e-10	Intron	MIR3939
cg27410726	6	166487293	rs407515	6	167407544	0.3696	C	G	0.08	6.33	3.8e-10	Intron	MIR3939
cg27410726	6	166487293	rs406095	6	167409087	0.3696	T	C	0.08	6.33	3.8e-10	Promoter	MIR3939
cg27410726	6	166487293	rs4710161	6	167409374	0.3696	C	T	0.08	6.33	3.8e-10	Promoter	MIR3939
cg27410726	6	166487293	rs388406	6	167409562	0.3696	G	A	0.08	6.33	3.8e-10	Promoter	MIR3939
cg27410726	6	166487293	rs377232	6	167409638	0.3696	A	C	0.08	6.33	3.8e-10	Promoter	MIR3939
cg27410726	6	166487293	rs433191	6	167409662	0.3696	A	T	0.08	6.33	3.8e-10	Promoter	MIR3939
cg27410726	6	166487293	rs387733	6	167409771	0.3696	G	A	0.08	6.33	3.8e-10	Promoter	MIR3939
cg27410726	6	166487293	rs430145	6	167410369	0.3696	T	C	0.08	6.33	3.8e-10	Promoter	MIR3939
cg27410726	6	166487293	rs425039	6	167410527	0.3696	T	C	0.08	6.33	3.8e-10	Promoter	MIR3939
cg27410726	6	166487293	rs376097	6	167410878	0.3696	G	A	0.08	6.33	3.8e-10	Promoter	MIR3939
cg27410726	6	166487293	rs424185	6	167410907	0.3696	T	C	0.08	6.33	3.8e-10	Promoter	MIR3939
cg27410726	6	166487293	rs400837	6	167411008	0.3696	C	T	0.08	6.33	3.8e-10	Promoter	MIR3939
cg27410726	6	166487293	rs239933	6	167413230	0.4578	G	A	0.07	5.72	1.46e-08	Promoter	CEP43
cg27410726	6	166487293	rs6456143	6	167415440	0.4594	A	C	0.07	5.8	8.98e-09	Promoter	CEP43
cg27410726	6	166487293	rs9459835	6	167417551	0.4594	T	G	0.07	5.8	8.98e-09	Promoter	CEP43
cg27410726	6	166487293	rs9459842	6	167432036	0.46	G	A	0.07	5.87	5.96e-09	Promoter	CEP43
cg27410726	6	166487293	rs7749278	6	167435325	0.46	C	T	0.07	5.87	5.96e-09	Promoter	CEP43
cg27410726	6	166487293	rs2282861	6	167440128	0.4605	T	C	0.07	5.86	6.56e-09	Exon	CEP43
cg27410726	6	166487293	rs2282860	6	167440244	0.4605	C	T	0.07	5.86	6.56e-09	Exon	CEP43
cg27410726	6	166487293	rs2181059	6	167441624	0.461	C	T	0.07	5.87	6e-09	Exon	CEP43
cg27410726	6	166487293	rs2237277	6	167442107	0.4605	A	G	0.07	5.86	6.56e-09	Exon	CEP43
cg27410726	6	166487293	rs9457258	6	167444254	0.4605	C	T	0.07	5.86	6.56e-09	Promoter	CEP43
cg27410726	6	166487293	rs10946205	6	167451311	0.4605	G	A	0.07	5.79	9.67e-09	Intron	CEP43
cg27410726	6	166487293	rs9459853	6	167465774	0.4594	A	C	0.07	5.84	7.07e-09	3' UTR	CEP43
cg27410726	6	166487293	rs6936261	6	167469676	0.4573	C	A	0.07	5.9	5.24e-09	Intron	CEP43
cg27410726	6	166487293	rs13210649	6	167473193	0.4573	G	T	0.07	5.9	5.24e-09	Intron	CEP43
cg27410726	6	166487293	rs12213801	6	167474084	0.4573	A	T	0.07	5.9	5.24e-09	Intron	CEP43
cg27410726	6	166487293	rs9457265	6	167480809	0.4573	C	T	0.07	5.9	5.24e-09	Intron	CEP43
cg27410726	6	166487293	rs2285148	6	167490999	0.4627	T	G	0.07	5.65	2.11e-08	Intron	CCR6
cg27410726	6	166487293	rs4710176	6	167491639	0.454	C	T	0.07	5.63	2.39e-08	Intron	CCR6
cg27410726	6	166487293	rs6921588	6	167494397	0.454	A	C	0.07	5.63	2.39e-08	Intron	CCR6
cg27410726	6	166487293	rs13213249	6	167495769	0.4518	A	G	0.07	5.52	4.4e-08	Intron	CCR6
cg27410726	6	166487293	rs13199692	6	167496017	0.4513	G	A	0.07	5.66	2e-08	Intron	CCR6
cg27410726	6	166487293	rs4710177	6	167497970	0.454	A	T	0.07	5.63	2.39e-08	Intron	CCR6
cg27410726	6	166487293	rs12181455	6	167498960	0.454	T	C	0.07	5.63	2.39e-08	Intron	CCR6
cg27410726	6	166487293	rs9459871	6	167499092	0.454	A	G	0.07	5.63	2.39e-08	Intron	CCR6
cg27410726	6	166487293	rs204295	6	167500562	0.4545	C	T	0.07	5.64	2.23e-08	Intron	CCR6
cg27410726	6	166487293	rs6941355	6	167506238	0.46	G	A	0.07	5.59	2.96e-08	Intron	CCR6
cg04816311	7	1027014	rs75180717	7	997617	0.1931	T	C	0.08	5.62	2.58e-08	Promoter	ADAP1
cg04816311	7	1027014	rs79397626	7	997854	0.1942	T	C	0.08	5.62	2.56e-08	Promoter	ADAP1
cg04816311	7	1027014	rs75494621	7	999144	0.1926	T	C	0.08	5.53	4.24e-08	Intron	ADAP1
cg04816311	7	1027014	rs78306433	7	999707	0.1931	T	C	0.08	5.62	2.58e-08	Intron	ADAP1
cg04816311	7	1027014	rs73256056	7	1000554	0.1931	C	A	0.08	5.62	2.58e-08	Intron	ADAP1
cg04816311	7	1027014	rs61184965	7	1001224	0.1931	C	T	0.08	5.62	2.58e-08	Intron	ADAP1
cg04816311	7	1027014	rs74703348	7	1001428	0.1931	G	A	0.08	5.62	2.58e-08	Intron	ADAP1
cg04816311	7	1027014	rs78534929	7	1002024	0.1926	G	T	0.08	5.64	2.33e-08	Intron	ADAP1
cg04816311	7	1027014	rs75273590	7	1002430	0.1921	C	T	0.08	5.56	3.61e-08	Intron	ADAP1
cg04816311	7	1027014	rs117685914	7	1002727	0.1921	T	A	0.08	5.56	3.61e-08	Intron	ADAP1
cg04816311	7	1027014	rs77581316	7	1003048	0.1915	T	C	0.08	5.66	2.03e-08	Intron	ADAP1
cg04816311	7	1027014	rs75507785	7	1003568	0.1888	T	G	0.08	5.58	3.09e-08	Intron	ADAP1
cg04816311	7	1027014	rs6949194	7	1004211	0.2835	G	C	0.09	7.31	5.88e-13	Intron	ADAP1
cg04816311	7	1027014	rs77672213	7	1006469	0.1904	G	A	0.08	5.83	7.87e-09	3' UTR	COX19
cg04816311	7	1027014	rs4723023	7	1006856	0.2829	C	G	0.09	7.26	8.27e-13	3' UTR	COX19
cg04816311	7	1027014	rs3735676	7	1007537	0.191	C	G	0.08	5.88	5.88e-09	3' UTR	COX19
cg04816311	7	1027014	rs2293521	7	1008966	0.191	T	C	0.08	5.88	5.88e-09	3' UTR	COX19
cg04816311	7	1027014	rs871172	7	1009644	0.2862	G	T	0.09	7.31	5.91e-13	Intron	COX19
cg04816311	7	1027014	rs141728516	7	1009840	0.1904	A	G	0.08	5.9	4.99e-09	Intron	COX19
cg04816311	7	1027014	rs78100945	7	1011843	0.1899	T	G	0.08	5.9	5.03e-09	Promoter	COX19
cg04816311	7	1027014	rs79610293	7	1012291	0.191	A	C	0.08	5.88	5.88e-09	Promoter	COX19
cg04816311	7	1027014	rs2272379	7	1012793	0.191	G	A	0.08	5.88	5.88e-09	Promoter	COX19
cg04816311	7	1027014	rs3735677	7	1014943	0.1904	A	G	0.08	5.87	5.92e-09	Promoter	COX19
cg04816311	7	1027014	rs117203709	7	1016053	0.191	T	C	0.08	5.88	5.88e-09	Promoter	COX19
cg04816311	7	1027014	rs80200909	7	1017698	0.1926	C	T	0.08	5.82	7.99e-09	Promoter	COX19
cg04816311	7	1027014	rs79867268	7	1018804	0.1904	T	C	0.09	6.09	1.62e-09	Distal Intergenic	COX19
cg04816311	7	1027014	rs79273954	7	1018969	0.1904	A	C	0.09	6.09	1.62e-09	Distal Intergenic	COX19
cg04816311	7	1027014	rs144936808	7	1019258	0.1899	G	A	0.08	5.94	4.05e-09	Distal Intergenic	CYP2W1
cg04816311	7	1027014	rs186214133	7	1019260	0.1899	C	T	0.08	5.94	4.05e-09	Distal Intergenic	CYP2W1
cg04816311	7	1027014	rs186879283	7	1020362	0.2165	C	T	0.08	5.67	1.95e-08	Promoter	CYP2W1
cg04816311	7	1027014	rs79469287	7	1021122	0.191	A	G	0.08	6	2.81e-09	Promoter	CYP2W1
cg04816311	7	1027014	rs78827273	7	1021947	0.1937	T	C	0.08	5.96	3.5e-09	Promoter	CYP2W1
cg04816311	7	1027014	rs2272375	7	1023013	0.2856	T	C	0.09	7.19	1.38e-12	Promoter	CYP2W1
cg04816311	7	1027014	rs73669931	7	1030453	0.1915	T	C	0.08	5.91	4.78e-09	Distal Intergenic	CYP2W1
cg04816311	7	1027014	rs73669932	7	1030906	0.1915	T	C	0.08	5.91	4.78e-09	Distal Intergenic	CYP2W1
cg04816311	7	1027014	rs11976017	7	1031117	0.2856	G	A	0.08	6.99	5.26e-12	Distal Intergenic	CYP2W1
cg04816311	7	1027014	rs60892210	7	1031170	0.1959	T	C	0.08	6.08	1.8e-09	Distal Intergenic	CYP2W1
cg04816311	7	1027014	rs79263447	7	1031815	0.1915	A	G	0.08	5.91	4.78e-09	Distal Intergenic	CYP2W1
cg04816311	7	1027014	rs1474824439	7	1031831	0.1921	T	C	0.08	5.86	6.44e-09	Distal Intergenic	CYP2W1
cg04816311	7	1027014	rs57858751	7	1032618	0.2214	G	C	0.1	7.34	4.75e-13	Distal Intergenic	CYP2W1
cg04816311	7	1027014	rs56109702	7	1032919	0.2018	A	G	0.09	6.62	6.15e-11	Distal Intergenic	CYP2W1
cg04816311	7	1027014	rs78896018	7	1034109	0.1888	T	A	0.08	5.75	1.18e-08	Distal Intergenic	CYP2W1
cg04816311	7	1027014	rs67211476	7	1034839	0.1872	T	C	0.09	6.07	1.86e-09	Distal Intergenic	CYP2W1
cg04816311	7	1027014	rs73046453	7	1035570	0.1937	C	T	0.09	6.59	7.22e-11	Distal Intergenic	CYP2W1
cg04816311	7	1027014	rs6954783	7	1036512	0.2791	G	A	0.09	7.2	1.22e-12	Distal Intergenic	CYP2W1
cg04816311	7	1027014	rs11559182	7	1036825	0.1872	A	G	0.09	6.07	1.86e-09	3' UTR	CYP2W1
cg04816311	7	1027014	rs4723350	7	1038627	0.2508	T	C	0.07	5.79	9.9e-09	Intron	CYP2W1
cg04816311	7	1027014	rs55700356	7	1038860	0.1888	G	A	0.09	6.02	2.57e-09	Intron	CYP2W1
cg04816311	7	1027014	rs55724197	7	1040742	0.1888	A	G	0.09	6.02	2.57e-09	Intron	CYP2W1
cg04816311	7	1027014	rs111211004	7	1042579	0.1839	A	G	0.09	6.44	1.92e-10	Intron	CYP2W1
cg04816311	7	1027014	rs4723380	7	1043819	0.2813	A	G	0.09	7.52	1.3e-13	Intron	CYP2W1
cg04816311	7	1027014	rs73046464	7	1044410	0.1882	C	T	0.09	6.11	1.46e-09	Intron	CYP2W1
cg04816311	7	1027014	rs9639696	7	1044938	0.2818	C	T	0.09	7.42	2.71e-13	Intron	MIR339
cg04816311	7	1027014	rs9639697	7	1044953	0.2818	T	C	0.09	7.42	2.71e-13	Intron	MIR339
cg04816311	7	1027014	rs73046466	7	1045416	0.1882	C	T	0.09	6.11	1.46e-09	Intron	MIR339
cg04816311	7	1027014	rs73046467	7	1045649	0.1866	A	G	0.09	6.17	1.05e-09	Intron	MIR339
cg04816311	7	1027014	rs12381393	7	1046358	0.1763	G	A	0.09	5.94	4.07e-09	Intron	MIR339
cg04816311	7	1027014	rs12381396	7	1046777	0.1866	G	A	0.09	6.24	6.84e-10	Intron	MIR339
cg04816311	7	1027014	rs56007992	7	1047293	0.1861	T	C	0.09	6.19	8.87e-10	Intron	MIR339
cg04816311	7	1027014	rs73046475	7	1050127	0.1861	T	C	0.09	6.19	8.87e-10	Intron	MIR339
cg04816311	7	1027014	rs77722243	7	1050595	0.1861	A	C	0.09	6.19	8.87e-10	Intron	MIR339
cg04816311	7	1027014	rs73046479	7	1051831	0.1861	A	G	0.09	6.19	8.87e-10	Intron	MIR339
cg04816311	7	1027014	rs55736553	7	1052103	0.1861	A	G	0.09	6.19	8.87e-10	Intron	MIR339
cg04816311	7	1027014	rs73046482	7	1053970	0.1877	A	G	0.09	6.2	8.45e-10	Intron	MIR339
cg04816311	7	1027014	rs78507633	7	1054933	0.1877	A	G	0.09	6.2	8.45e-10	Intron	MIR339
cg04816311	7	1027014	rs1371874529	7	1055264	0.1877	A	G	0.09	6.2	8.45e-10	Intron	MIR339
cg04816311	7	1027014	rs75164443	7	1055579	0.1872	T	C	0.09	6.23	6.9e-10	Intron	MIR339
cg04816311	7	1027014	rs62433147	7	1059357	0.2481	A	G	0.07	5.92	4.5e-09	Intron	MIR339
cg04816311	7	1027014	rs77414940	7	1062106	0.1839	C	G	0.09	6.23	7.3e-10	Promoter	MIR339
cg04816311	7	1027014	rs1881127	7	1063104	0.2786	C	T	0.09	7.35	4.47e-13	Promoter	MIR339
cg04816311	7	1027014	rs77633776	7	1063407	0.1855	A	G	0.09	6.06	1.96e-09	Promoter	MIR339
cg04816311	7	1027014	rs56016252	7	1064955	0.185	T	C	0.09	6.21	8.14e-10	Promoter	MIR339
cg04816311	7	1027014	rs55834927	7	1065174	0.185	A	G	0.09	6.21	8.14e-10	Promoter	MIR339
cg04816311	7	1027014	rs11974176	7	1065569	0.2688	T	C	0.08	6.5	1.36e-10	Promoter	C7orf50
cg04816311	7	1027014	rs884978	7	1066059	0.1991	A	G	0.09	6.67	4.47e-11	Promoter	C7orf50
cg04816311	7	1027014	rs117343216	7	1067802	0.1828	T	C	0.09	6.31	4.37e-10	Promoter	C7orf50
cg04816311	7	1027014	rs73048354	7	1069859	0.1855	T	C	0.09	6.3	4.68e-10	Promoter	C7orf50
cg04816311	7	1027014	rs73048355	7	1070108	0.1855	G	T	0.09	6.3	4.68e-10	Promoter	C7orf50
cg04816311	7	1027014	rs78798592	7	1071592	0.1605	C	G	0.09	6.11	1.47e-09	Intron	C7orf50
cg04816311	7	1027014	rs1390078740	7	1075592	0.1855	T	C	0.09	6.3	4.68e-10	Intron	C7orf50
cg04816311	7	1027014	rs117772857	7	1076159	0.185	G	T	0.09	6.31	4.26e-10	Intron	GPR146
cg04816311	7	1027014	rs73048361	7	1076554	0.1861	A	G	0.09	6.32	4.14e-10	Intron	GPR146
cg04816311	7	1027014	rs117832807	7	1079874	0.1855	G	C	0.09	6.3	4.68e-10	Intron	GPR146
cg04816311	7	1027014	rs73048366	7	1081277	0.1882	G	A	0.09	6.35	3.35e-10	Promoter	GPR146
cg04816311	7	1027014	rs62430968	7	1086521	0.2628	G	C	0.09	7.09	2.65e-12	Promoter	GPR146
cg04816311	7	1027014	rs3735674	7	1087562	0.1806	C	G	0.09	6.55	9.56e-11	Intron	GPR146
cg04816311	7	1027014	rs73048381	7	1088706	0.1795	T	G	0.09	6.57	8.17e-11	Intron	GPR146
cg04816311	7	1027014	rs56257712	7	1091452	0.1828	C	T	0.09	6.59	7.43e-11	Intron	GPR146
cg04816311	7	1027014	rs76654767	7	1092005	0.1817	T	C	0.09	6.53	1.05e-10	Promoter	GPR146
cg04816311	7	1027014	rs75709543	7	1093281	0.1844	C	T	0.09	6.35	3.32e-10	Promoter	GPR146
cg04816311	7	1027014	rs1881125	7	1096918	0.3281	G	A	0.07	5.58	3.24e-08	Promoter	GPR146
cg04816311	7	1027014	rs12701798	7	1099092	0.3275	G	A	0.07	5.64	2.21e-08	Promoter	GPR146
cg04816311	7	1027014	rs73048395	7	1100452	0.1741	T	C	0.1	6.72	3.24e-11	Intron	GPR146
cg04816311	7	1027014	rs55939968	7	1101243	0.1725	A	G	0.1	6.64	5.2e-11	Intron	GPR146
cg04816311	7	1027014	rs7811577	7	1102829	0.3303	G	C	0.07	5.81	8.48e-09	Intron	GPR146
cg04816311	7	1027014	rs73048399	7	1103306	0.1746	G	A	0.1	6.66	4.61e-11	Intron	GPR146
cg04816311	7	1027014	rs10280960	7	1103697	0.3308	C	T	0.07	5.85	6.85e-09	Intron	GPR146
cg04816311	7	1027014	rs73050404	7	1103828	0.1741	A	G	0.1	6.72	3.24e-11	Intron	GPR146
cg04816311	7	1027014	rs871019	7	1105230	0.3303	G	A	0.07	5.81	8.48e-09	Intron	LOC105375120
cg04816311	7	1027014	rs6957733	7	1106327	0.3303	G	T	0.07	5.81	8.48e-09	Intron	LOC105375120
cg04816311	7	1027014	rs6463001	7	1108272	0.3368	C	A	0.07	6.44	1.97e-10	Intron	LOC105375120
cg04816311	7	1027014	rs73050411	7	1108345	0.1741	G	A	0.1	6.72	3.24e-11	Intron	LOC105375120
cg04816311	7	1027014	rs6968946	7	1108759	0.3303	G	T	0.07	5.81	8.48e-09	Intron	LOC105375120
cg04816311	7	1027014	rs13226443	7	1108921	0.3362	C	T	0.07	6.44	1.87e-10	Intron	LOC105375120
cg04816311	7	1027014	rs13227249	7	1110130	0.3297	G	A	0.07	5.81	8.36e-09	Intron	LOC105375120
cg04816311	7	1027014	rs73050418	7	1111319	0.1746	T	A	0.1	6.64	5.51e-11	Promoter	LOC105375120
cg04816311	7	1027014	rs73050423	7	1114454	0.1714	A	G	0.1	6.54	1e-10	Promoter	LOC105375120
cg04816311	7	1027014	rs73050425	7	1115834	0.1589	C	G	0.09	5.64	2.26e-08	Promoter	LOC105375120
cg04816311	7	1027014	rs6945202	7	1116558	0.3449	C	T	0.07	6.16	1.1e-09	Promoter	LOC105375120
cg04816311	7	1027014	rs79230706	7	1120390	0.1578	A	G	0.09	5.7	1.63e-08	Promoter	GPER1
cg04816311	7	1027014	rs76227513	7	1120426	0.1589	A	G	0.09	5.68	1.77e-08	Promoter	GPER1
cg04816311	7	1027014	rs75515957	7	1124986	0.1583	T	C	0.09	5.75	1.19e-08	Promoter	GPER1
cg04816311	7	1027014	rs77095258	7	1125746	0.1583	A	G	0.09	5.75	1.19e-08	Promoter	GPER1
cg04816311	7	1027014	rs78774273	7	1128572	0.1583	A	G	0.09	5.6	2.81e-08	Promoter	GPER1
cg04816311	7	1027014	rs76754070	7	1129137	0.1572	A	C	0.09	5.54	3.94e-08	Promoter	GPER1
cg04816311	7	1027014	rs1133041	7	1132691	0.1605	T	C	0.09	5.64	2.32e-08	3' UTR	GPER1
cg04816311	7	1027014	rs34811797	7	1135158	0.1594	A	G	0.09	5.63	2.44e-08	Intron	GPER1
cg04816311	7	1027014	rs1280597678	7	1135530	0.1605	T	G	0.09	5.64	2.32e-08	Intron	GPER1
cg04816311	7	1027014	rs75137850	7	1136537	0.1725	G	A	0.1	6.58	7.91e-11	Intron	GPER1
cg04816311	7	1027014	rs75435391	7	1137442	0.161	A	G	0.09	5.73	1.38e-08	Intron	GPER1
cg04816311	7	1027014	rs79250942	7	1137741	0.1725	A	G	0.1	6.53	1.11e-10	Intron	GPER1
cg04816311	7	1027014	rs118149751	7	1138347	0.1589	A	G	0.09	5.6	2.82e-08	Intron	GPER1
cg04816311	7	1027014	rs11976805	7	1138716	0.1839	T	C	0.08	5.68	1.84e-08	Intron	GPER1
cg04816311	7	1027014	rs117322927	7	1140163	0.1594	T	C	0.09	5.67	1.9e-08	Intron	GPER1
cg04816311	7	1027014	rs80007722	7	1140309	0.1594	T	C	0.09	5.67	1.9e-08	Intron	GPER1
cg04816311	7	1027014	rs75683586	7	1140446	0.1594	T	C	0.09	5.67	1.9e-08	Intron	GPER1
cg04816311	7	1027014	rs79763120	7	1140572	0.1594	A	G	0.09	5.67	1.9e-08	Intron	GPER1
cg04816311	7	1027014	rs78399431	7	1141470	0.1888	A	G	0.08	5.71	1.52e-08	Intron	GPER1
cg04816311	7	1027014	rs78224195	7	1141596	0.1594	T	A	0.09	5.67	1.9e-08	Intron	GPER1
cg04816311	7	1027014	rs10262232	7	1141925	0.1888	A	C	0.08	5.71	1.52e-08	Intron	GPER1
cg04816311	7	1027014	rs75102927	7	1142862	0.1888	C	G	0.08	5.71	1.52e-08	Intron	GPER1
cg04816311	7	1027014	rs75902321	7	1144501	0.1589	A	G	0.09	5.59	3.06e-08	Intron	GPER1
cg04816311	7	1027014	rs74803934	7	1145584	0.1589	A	G	0.09	5.59	3.06e-08	Intron	GPER1
cg04816311	7	1027014	rs79419793	7	1145815	0.1589	A	C	0.09	5.59	3.06e-08	Intron	GPER1
cg04816311	7	1027014	rs78442641	7	1146460	0.1589	A	G	0.09	5.59	3.06e-08	Intron	GPER1
cg04816311	7	1027014	rs75017329	7	1149993	0.1589	T	C	0.09	5.59	3.06e-08	Intron	C7orf50
cg04816311	7	1027014	rs75183588	7	1150264	0.1583	A	G	0.09	5.61	2.68e-08	Intron	C7orf50
cg04816311	7	1027014	rs77890691	7	1151572	0.1583	A	G	0.09	5.55	3.76e-08	Intron	C7orf50
cg04816311	7	1027014	rs142964744	7	1155318	0.161	G	A	0.09	5.69	1.7e-08	Intron	C7orf50
cg04816311	7	1027014	rs199815059	7	1155735	0.1567	C	G	0.09	5.78	1.02e-08	Intron	C7orf50
cg04816311	7	1027014	rs117428713	7	1155762	0.1529	C	T	0.09	5.55	3.68e-08	Intron	C7orf50
cg04816311	7	1027014	rs773971197	7	1160456	0.1589	T	C	0.09	5.59	3.06e-08	Intron	C7orf50
cg04816311	7	1027014	rs75635665	7	1161267	0.1589	T	G	0.09	5.59	3.06e-08	Intron	C7orf50
cg04816311	7	1027014	rs78774472	7	1164026	0.1583	A	G	0.09	5.54	3.87e-08	Promoter	C7orf50
cg04816311	7	1027014	rs73263094	7	1164406	0.1583	G	A	0.09	5.54	3.87e-08	Promoter	C7orf50
cg04816311	7	1027014	rs73263095	7	1164762	0.1589	G	C	0.09	5.59	3.06e-08	Promoter	C7orf50
cg04816311	7	1027014	rs10239011	7	1165036	0.197	G	A	0.09	6.36	3.09e-10	Promoter	C7orf50
cg04816311	7	1027014	rs73263099	7	1166402	0.1594	T	C	0.09	5.67	1.96e-08	Promoter	C7orf50
cg04816311	7	1027014	rs61091708	7	1166532	0.1594	A	G	0.09	5.67	1.96e-08	Promoter	C7orf50
cg04816311	7	1027014	rs73263102	7	1167077	0.1594	A	G	0.09	5.67	1.96e-08	Promoter	C7orf50
cg04816311	7	1027014	rs57516532	7	1172869	0.1665	T	C	0.1	6.42	2.12e-10	Intron	C7orf50
cg04816311	7	1027014	rs74924401	7	1173104	0.1594	T	C	0.09	5.67	1.96e-08	Intron	C7orf50
cg04816311	7	1027014	rs56031663	7	1173578	0.1665	G	C	0.1	6.42	2.12e-10	Intron	C7orf50
cg04816311	7	1027014	rs7786539	7	1173957	0.1665	C	A	0.1	6.42	2.12e-10	Intron	C7orf50
cg04816311	7	1027014	rs76687420	7	1174232	0.1594	T	C	0.09	5.67	1.96e-08	Intron	C7orf50
cg04816311	7	1027014	rs58521998	7	1175091	0.1665	A	C	0.1	6.42	2.12e-10	Promoter	C7orf50
cg04816311	7	1027014	rs76990427	7	1177009	0.1594	A	T	0.09	5.67	1.96e-08	Promoter	C7orf50
cg04816311	7	1027014	rs73672520	7	1177965	0.1665	T	C	0.1	6.42	2.12e-10	Promoter	C7orf50
cg04816311	7	1027014	rs77188166	7	1178364	0.1594	T	C	0.09	5.67	1.96e-08	Promoter	C7orf50
cg04816311	7	1027014	rs73264920	7	1178487	0.1665	A	G	0.1	6.42	2.12e-10	Promoter	C7orf50
cg04816311	7	1027014	rs10464387	7	1180217	0.1665	G	T	0.1	6.42	2.12e-10	Promoter	C7orf50
cg04816311	7	1027014	rs10227709	7	1180515	0.1948	G	T	0.09	6.39	2.61e-10	Promoter	C7orf50
cg04816311	7	1027014	rs10278051	7	1181139	0.2584	T	C	0.09	6.89	1.03e-11	Distal Intergenic	C7orf50
cg04816311	7	1027014	rs10281161	7	1181356	0.2242	T	C	0.09	6.75	2.57e-11	Distal Intergenic	C7orf50
cg04816311	7	1027014	rs10464243	7	1181949	0.1665	C	G	0.1	6.42	2.12e-10	Distal Intergenic	C7orf50
cg04816311	7	1027014	rs73264931	7	1182330	0.1665	G	C	0.1	6.42	2.12e-10	Distal Intergenic	C7orf50
cg04816311	7	1027014	rs57847228	7	1182922	0.1665	G	C	0.1	6.42	2.12e-10	Distal Intergenic	C7orf50
cg04816311	7	1027014	rs55880946	7	1184356	0.1665	A	G	0.1	6.42	2.12e-10	Distal Intergenic	C7orf50
cg04816311	7	1027014	rs73264940	7	1187684	0.148	A	G	0.1	6.05	2.08e-09	Distal Intergenic	ZFAND2A
cg04816311	7	1027014	rs73264941	7	1187868	0.1665	G	A	0.1	6.42	2.12e-10	Distal Intergenic	ZFAND2A
cg04816311	7	1027014	rs78389908	7	1188300	0.1594	T	C	0.09	5.67	1.96e-08	Distal Intergenic	ZFAND2A
cg04816311	7	1027014	rs61494559	7	1188505	0.1665	C	G	0.1	6.42	2.12e-10	Distal Intergenic	ZFAND2A
cg04816311	7	1027014	rs55647957	7	1188915	0.1665	A	G	0.1	6.42	2.12e-10	Distal Intergenic	ZFAND2A
cg04816311	7	1027014	rs6943934	7	1189178	0.167	C	T	0.1	6.48	1.5e-10	Distal Intergenic	ZFAND2A
cg04816311	7	1027014	rs6959783	7	1192018	0.167	C	T	0.1	6.37	2.99e-10	Intron	ZFAND2A
cg04816311	7	1027014	rs79350501	7	1193450	0.1605	A	G	0.09	5.67	1.95e-08	Promoter	ZFAND2A
cg04816311	7	1027014	rs79891205	7	1193948	0.1605	G	C	0.09	5.67	1.95e-08	Promoter	ZFAND2A
cg04816311	7	1027014	rs76926989	7	1194333	0.1605	A	C	0.09	5.67	1.95e-08	Promoter	ZFAND2A
cg04816311	7	1027014	rs10279766	7	1194543	0.1964	C	G	0.09	6.4	2.51e-10	Promoter	ZFAND2A
cg04816311	7	1027014	rs7781581	7	1195264	0.167	C	T	0.1	6.48	1.5e-10	Promoter	ZFAND2A
cg04816311	7	1027014	rs75674288	7	1195322	0.16	C	A	0.09	5.72	1.44e-08	Promoter	ZFAND2A
cg04816311	7	1027014	rs79673567	7	1195334	0.16	A	G	0.09	5.72	1.44e-08	Promoter	ZFAND2A
cg04816311	7	1027014	rs6964037	7	1198877	0.191	G	A	0.09	6.21	7.86e-10	Promoter	ZFAND2A
cg04816311	7	1027014	rs77904558	7	1202636	0.1855	T	C	0.08	5.61	2.64e-08	Promoter	ZFAND2A-DT
cg04816311	7	1027014	rs77861001	7	1202954	0.1855	C	T	0.08	5.61	2.64e-08	Promoter	ZFAND2A-DT
cg04816311	7	1027014	rs75810623	7	1203264	0.1855	T	C	0.08	5.61	2.64e-08	Intron	ZFAND2A-DT
cg04816311	7	1027014	rs78062500	7	1204109	0.1855	G	C	0.08	5.61	2.64e-08	Exon	ZFAND2A-DT
cg04816311	7	1027014	rs77978253	7	1204843	0.1855	A	G	0.08	5.61	2.64e-08	Exon	ZFAND2A-DT
cg04816311	7	1027014	rs76243969	7	1204942	0.1855	A	G	0.08	5.61	2.64e-08	Exon	ZFAND2A-DT
cg04816311	7	1027014	rs76168200	7	1206192	0.1855	T	C	0.08	5.61	2.64e-08	Distal Intergenic	ZFAND2A-DT
cg04816311	7	1027014	rs75624851	7	1210870	0.1774	T	C	0.08	5.67	1.94e-08	Distal Intergenic	ZFAND2A-DT
cg04816311	7	1027014	rs10257426	7	1213694	0.2062	A	G	0.08	5.73	1.33e-08	Distal Intergenic	ZFAND2A-DT
cg07514306	7	130294512	rs6960767	7	129942917	0.3787	A	G	0.1	5.51	4.73e-08	Intron	CPA4
cg07514306	7	130294512	rs6467294	7	129943127	0.3787	C	T	0.1	5.51	4.73e-08	Intron	CPA4
cg07514306	7	130294512	rs1038627	7	129944994	0.3803	G	A	0.1	5.57	3.31e-08	Promoter	CPA4
cg07514306	7	130294512	rs729167	7	129951108	0.3857	T	C	0.09	5.55	3.82e-08	Intron	CPA4
cg07514306	7	130294512	rs3800773	7	129957769	0.4151	A	G	0.1	5.66	1.98e-08	Intron	CPA4
cg07514306	7	130294512	rs3800775	7	129958167	0.4146	T	C	0.09	5.57	3.36e-08	Intron	CPA4
cg07514306	7	130294512	rs10280724	7	129960862	0.4151	A	T	0.09	5.52	4.29e-08	Intron	CPA4
cg07514306	7	130294512	rs1906489	7	129961743	0.4151	G	C	0.09	5.53	4.07e-08	Intron	CPA4
cg24799186	8	102776980	rs12541536	8	103773944	0.2294	G	A	0.09	8.54	5.32e-17	Distal Intergenic	GASAL1
cg24799186	8	102776980	rs9649920	8	103774723	0.2289	G	A	0.09	8.58	3.94e-17	Distal Intergenic	GASAL1
cg24799186	8	102776980	rs9649921	8	103774838	0.2289	T	G	0.09	8.58	3.94e-17	Distal Intergenic	GASAL1
cg24799186	8	102776980	rs9650004	8	103774879	0.2289	C	T	0.09	8.58	3.94e-17	Distal Intergenic	GASAL1
cg24799186	8	102776980	rs9650005	8	103775030	0.2289	T	A	0.09	8.58	3.94e-17	Distal Intergenic	GASAL1
cg24799186	8	102776980	rs10505035	8	103775175	0.2289	G	A	0.09	8.58	3.94e-17	Distal Intergenic	GASAL1
cg24799186	8	102776980	rs77596980	8	103775527	0.2289	C	G	0.09	8.58	3.94e-17	Distal Intergenic	GASAL1
cg24799186	8	102776980	rs76815198	8	103775733	0.2289	T	C	0.09	8.58	3.94e-17	Distal Intergenic	GASAL1
cg24799186	8	102776980	rs61682224	8	103776110	0.3539	C	G	0.06	6.15	1.17e-09	Distal Intergenic	GASAL1
cg24799186	8	102776980	rs79593001	8	103777322	0.1326	T	C	0.1	7.39	3.4e-13	Distal Intergenic	GASAL1
cg24799186	8	102776980	rs1529796	8	103782719	0.3479	G	A	0.07	7.5	1.51e-13	Distal Intergenic	GASAL1
cg24799186	8	102776980	rs12542846	8	103786630	0.2273	A	G	0.1	9.65	4.82e-21	Distal Intergenic	GASAL1
cg24799186	8	102776980	rs62524042	8	103789794	0.3966	G	A	0.07	7.58	8.55e-14	Distal Intergenic	GASAL1
cg24799186	8	102776980	rs4734669	8	103793053	0.2083	A	G	0.06	5.84	7.25e-09	Distal Intergenic	GASAL1
cg24799186	8	102776980	rs1865336	8	103793370	0.2078	A	G	0.06	5.83	7.58e-09	Distal Intergenic	GASAL1
cg24799186	8	102776980	rs1991926	8	103794339	0.381	G	A	0.06	6.95	6.92e-12	Distal Intergenic	GASAL1
cg24799186	8	102776980	rs1991925	8	103794374	0.381	C	A	0.06	6.95	6.92e-12	Distal Intergenic	GASAL1
cg24799186	8	102776980	rs1991924	8	103794864	0.3847	G	A	0.06	6.73	2.93e-11	Distal Intergenic	GASAL1
cg24799186	8	102776980	rs7817397	8	103796715	0.3853	C	T	0.06	6.73	3.03e-11	Distal Intergenic	GASAL1
cg24799186	8	102776980	rs142551240	8	103799868	0.02273	C	T	0.17	5.9	5.08e-09	Distal Intergenic	GASAL1
cg24799186	8	102776980	rs997309263	8	103801668	0.2181	T	C	0.06	5.66	1.99e-08	Distal Intergenic	GASAL1
cg24799186	8	102776980	rs2513902	8	103802649	0.4194	A	C	0.05	5.92	4.46e-09	Distal Intergenic	GASAL1
cg24799186	8	102776980	rs2513903	8	103802844	0.4194	A	G	0.05	5.92	4.46e-09	Distal Intergenic	GASAL1
cg24799186	8	102776980	rs58045596	8	103803281	0.4968	G	A	0.05	5.69	1.68e-08	Distal Intergenic	GASAL1
cg24799186	8	102776980	rs12680146	8	103804097	0.4951	C	T	0.05	5.77	1.09e-08	Distal Intergenic	GASAL1
cg24799186	8	102776980	rs2513905	8	103805097	0.4177	C	T	0.05	6.01	2.73e-09	Distal Intergenic	GASAL1
cg24799186	8	102776980	rs2436870	8	103805165	0.4177	G	T	0.05	6.01	2.73e-09	Distal Intergenic	GASAL1
cg24799186	8	102776980	rs3936370	8	103805535	0.4951	C	G	0.05	5.77	1.09e-08	Distal Intergenic	GASAL1
cg24799186	8	102776980	rs7822158	8	103806768	0.4951	C	T	0.05	5.77	1.09e-08	Distal Intergenic	GASAL1
cg24799186	8	102776980	rs11786374	8	103807175	0.4957	G	A	0.05	5.89	5.41e-09	Distal Intergenic	GASAL1
cg00435244	8	116113510	rs10086102	8	116960975	0.401	G	A	0.05	5.77	1.09e-08	Distal Intergenic	TRPS1
cg00435244	8	116113510	rs722740	8	116961980	0.3723	C	T	0.05	6.13	1.32e-09	Distal Intergenic	TRPS1
cg00435244	8	116113510	rs13277848	8	116962604	0.3999	G	A	0.05	5.82	8e-09	Distal Intergenic	TRPS1
cg00435244	8	116113510	rs2223053	8	116963371	0.3718	T	G	0.05	6.17	1e-09	Intron	TRPS1
cg00435244	8	116113510	rs10095930	8	116974302	0.3718	C	T	0.05	6.15	1.13e-09	Intron	TRPS1
cg00435244	8	116113510	rs11784903	8	116979531	0.4037	T	C	0.05	6.43	2.02e-10	Intron	TRPS1
cg00435244	8	116113510	rs1004112	8	116980628	0.4037	T	C	0.05	6.43	2.02e-10	Intron	TRPS1
cg00435244	8	116113510	rs17741331	8	116980929	0.3658	G	A	0.05	6.43	2.02e-10	Intron	TRPS1
cg00435244	8	116113510	rs9297548	8	116981938	0.4037	T	C	0.05	6.43	2.02e-10	Exon	TRPS1
cg00435244	8	116113510	rs2358156	8	116983038	0.375	G	C	0.05	6.65	5.15e-11	Intron	TRPS1
cg00435244	8	116113510	rs10091664	8	116983687	0.4042	G	C	0.05	6.39	2.66e-10	Intron	TRPS1
cg00435244	8	116113510	rs6469614	8	116985300	0.4064	G	A	0.05	6.34	3.53e-10	Intron	TRPS1
cg00435244	8	116113510	rs72681827	8	116986439	0.3663	A	G	0.05	6.49	1.44e-10	Intron	TRPS1
cg00435244	8	116113510	rs10094190	8	116987637	0.4042	T	G	0.05	6.39	2.66e-10	Intron	TRPS1
cg00435244	8	116113510	rs10110738	8	116988247	0.3728	C	T	0.05	6.7	3.74e-11	Intron	TRPS1
cg00435244	8	116113510	rs12056768	8	116988527	0.3728	T	G	0.05	6.7	3.74e-11	Intron	TRPS1
cg00435244	8	116113510	rs12056610	8	116988588	0.3728	G	A	0.05	6.7	3.74e-11	Intron	TRPS1
cg00435244	8	116113510	rs10086506	8	116988947	0.3728	G	T	0.05	6.7	3.74e-11	Intron	TRPS1
cg00435244	8	116113510	rs13273750	8	116993110	0.375	T	C	0.06	6.96	6.57e-12	Intron	TRPS1
cg00435244	8	116113510	rs7827659	8	116993707	0.375	A	G	0.06	6.96	6.57e-12	Intron	TRPS1
cg00435244	8	116113510	rs13256317	8	116995131	0.375	A	G	0.06	6.96	6.57e-12	Intron	TRPS1
cg00435244	8	116113510	rs12155585	8	116995459	0.375	A	G	0.06	6.96	6.57e-12	Intron	TRPS1
cg00435244	8	116113510	rs727993	8	116997911	0.375	A	G	0.06	6.96	6.57e-12	Intron	TRPS1
cg00435244	8	116113510	rs2223054	8	116999486	0.375	T	C	0.06	6.96	6.57e-12	Intron	TRPS1
cg00435244	8	116113510	rs4876626	8	116999790	0.375	T	A	0.06	6.96	6.57e-12	Intron	TRPS1
cg00435244	8	116113510	rs13274491	8	117002530	0.375	A	C	0.06	6.96	6.57e-12	Intron	TRPS1
cg00435244	8	116113510	rs1022439	8	117004010	0.3772	T	A	0.06	6.91	9.11e-12	Intron	TRPS1
cg00435244	8	116113510	rs2064009	8	117007850	0.3772	C	T	0.06	6.91	9.11e-12	Intron	TRPS1
cg00435244	8	116113510	rs2223055	8	117010449	0.375	C	T	0.06	7.11	2.37e-12	Intron	TRPS1
cg00435244	8	116113510	rs2223056	8	117010468	0.375	A	T	0.06	6.96	6.57e-12	Intron	TRPS1
cg00435244	8	116113510	rs2049840	8	117011653	0.3761	G	A	0.06	6.87	1.19e-11	Intron	TRPS1
cg00435244	8	116113510	rs2223057	8	117011796	0.3761	G	A	0.06	6.87	1.19e-11	Intron	TRPS1
cg00435244	8	116113510	rs2205262	8	117011884	0.3761	C	A	0.06	6.87	1.19e-11	Intron	TRPS1
cg00435244	8	116113510	rs2205263	8	117011898	0.3761	T	G	0.06	6.87	1.19e-11	Intron	TRPS1
cg00435244	8	116113510	rs2205264	8	117011944	0.3761	C	A	0.06	6.87	1.19e-11	Intron	TRPS1
cg00435244	8	116113510	rs9297549	8	117012251	0.3761	C	A	0.06	6.87	1.19e-11	Intron	TRPS1
cg00435244	8	116113510	rs6982226	8	117015142	0.3723	G	T	0.06	6.98	5.51e-12	Intron	TRPS1
cg00435244	8	116113510	rs6981849	8	117015173	0.3723	A	G	0.06	6.98	5.51e-12	Intron	TRPS1
cg00435244	8	116113510	rs1079800	8	117017561	0.3707	C	T	0.06	6.96	6.36e-12	Intron	TRPS1
cg00435244	8	116113510	rs4452817	8	117019859	0.3588	T	C	0.06	6.89	1.01e-11	Intron	TRPS1
cg00435244	8	116113510	rs13268710	8	117020825	0.3912	G	T	0.06	6.95	6.7e-12	Intron	TRPS1
cg00435244	8	116113510	rs9650058	8	117022395	0.3696	C	T	0.06	6.91	8.96e-12	Intron	TRPS1
cg00435244	8	116113510	rs7827172	8	117023201	0.3696	G	T	0.06	6.91	8.96e-12	Intron	TRPS1
cg00435244	8	116113510	rs1016003	8	117024782	0.3696	A	G	0.06	6.91	8.96e-12	Intron	TRPS1
cg00435244	8	116113510	rs1118409	8	117025777	0.3696	G	A	0.06	6.91	8.96e-12	Intron	TRPS1
cg00435244	8	116113510	rs12334961	8	117026616	0.3696	G	T	0.06	6.91	8.96e-12	Intron	TRPS1
cg00435244	8	116113510	rs722951	8	117027494	0.3696	A	C	0.06	6.91	8.96e-12	Intron	TRPS1
cg00435244	8	116113510	rs7817441	8	117028504	0.3696	G	A	0.06	6.91	8.96e-12	Intron	TRPS1
cg00435244	8	116113510	rs6469616	8	117028616	0.369	G	A	0.06	6.88	1.09e-11	Intron	TRPS1
cg00435244	8	116113510	rs2316136	8	117034223	0.3696	T	C	0.06	6.91	8.96e-12	Intron	TRPS1
cg00435244	8	116113510	rs2223060	8	117035009	0.3696	C	T	0.06	6.91	8.96e-12	Intron	TRPS1
cg00435244	8	116113510	rs9297550	8	117035784	0.3696	G	T	0.06	6.91	8.96e-12	Intron	TRPS1
cg00435244	8	116113510	rs9643106	8	117035805	0.3696	G	A	0.06	6.91	8.96e-12	Intron	TRPS1
cg00435244	8	116113510	rs7830765	8	117036709	0.3674	C	T	0.06	6.86	1.23e-11	Intron	TRPS1
cg00435244	8	116113510	rs6469617	8	117038175	0.3696	T	C	0.06	6.91	8.96e-12	Intron	TRPS1
cg00435244	8	116113510	rs7823874	8	117038437	0.3696	T	C	0.06	6.91	8.96e-12	Intron	TRPS1
cg00435244	8	116113510	rs13273342	8	117039245	0.3907	G	A	0.05	6.87	1.17e-11	Intron	TRPS1
cg00435244	8	116113510	rs13281156	8	117039834	0.3707	A	G	0.06	6.85	1.39e-11	Intron	TRPS1
cg00435244	8	116113510	rs2205272	8	117040501	0.3696	T	A	0.06	6.91	8.96e-12	Intron	TRPS1
cg00435244	8	116113510	rs7004537	8	117040806	0.3707	T	G	0.05	6.76	2.46e-11	Intron	TRPS1
cg00435244	8	116113510	rs6988408	8	117041050	0.3696	A	G	0.06	6.91	8.96e-12	Intron	TRPS1
cg00435244	8	116113510	rs7838429	8	117043290	0.3696	C	T	0.06	6.91	8.96e-12	Intron	TRPS1
cg00435244	8	116113510	rs13269663	8	117044218	0.3696	C	T	0.06	6.91	8.96e-12	Intron	TRPS1
cg00435244	8	116113510	rs11993857	8	117044339	0.3696	A	C	0.06	6.91	8.96e-12	Intron	TRPS1
cg00435244	8	116113510	rs13280624	8	117045546	0.3696	C	T	0.06	6.91	8.96e-12	Intron	TRPS1
cg00435244	8	116113510	rs6983042	8	117045810	0.3696	G	A	0.06	6.91	8.96e-12	Intron	TRPS1
cg00435244	8	116113510	rs6986638	8	117045938	0.3696	A	G	0.06	6.91	8.96e-12	Intron	TRPS1
cg00435244	8	116113510	rs6469618	8	117046139	0.3696	T	C	0.06	6.91	8.96e-12	Intron	TRPS1
cg00435244	8	116113510	rs6469619	8	117046331	0.3696	C	A	0.06	6.91	8.96e-12	Intron	TRPS1
cg00435244	8	116113510	rs6469620	8	117046415	0.3696	A	T	0.06	6.91	8.96e-12	Intron	TRPS1
cg00435244	8	116113510	rs6469621	8	117046455	0.369	G	A	0.06	6.92	8.29e-12	Intron	TRPS1
cg00435244	8	116113510	rs11996806	8	117047145	0.369	A	C	0.06	6.89	1.05e-11	Intron	TRPS1
cg00435244	8	116113510	rs10955762	8	117047353	0.369	A	G	0.06	6.89	1.05e-11	Intron	TRPS1
cg00435244	8	116113510	rs2205274	8	117047638	0.369	T	C	0.06	6.89	1.05e-11	Intron	TRPS1
cg00435244	8	116113510	rs2205275	8	117047719	0.369	A	C	0.06	6.89	1.05e-11	Intron	TRPS1
cg00435244	8	116113510	rs2205276	8	117047756	0.369	T	C	0.06	6.89	1.05e-11	Intron	TRPS1
cg00435244	8	116113510	rs6469622	8	117048395	0.3696	C	T	0.06	6.91	8.96e-12	Intron	TRPS1
cg00435244	8	116113510	rs6469623	8	117048919	0.369	A	G	0.06	6.89	1.05e-11	Intron	TRPS1
cg00435244	8	116113510	rs4876629	8	117049363	0.369	C	T	0.06	6.89	1.05e-11	Intron	TRPS1
cg00435244	8	116113510	rs4876630	8	117049391	0.369	T	C	0.06	6.89	1.05e-11	Intron	TRPS1
cg00435244	8	116113510	rs4876631	8	117049503	0.369	C	A	0.06	6.89	1.05e-11	Intron	TRPS1
cg00435244	8	116113510	rs13252360	8	117049546	0.369	T	C	0.06	6.89	1.05e-11	Intron	TRPS1
cg00435244	8	116113510	rs2223063	8	117050089	0.3685	C	T	0.06	7.03	4.02e-12	Intron	TRPS1
cg00435244	8	116113510	rs12235002	8	117050495	0.3593	G	A	0.06	6.91	9.29e-12	Intron	TRPS1
cg00435244	8	116113510	rs2316301	8	117051440	0.369	G	A	0.06	6.89	1.05e-11	Intron	TRPS1
cg00435244	8	116113510	rs2873122	8	117051449	0.369	C	G	0.06	6.89	1.05e-11	Intron	TRPS1
cg00435244	8	116113510	rs2316302	8	117051486	0.3696	C	T	0.06	6.91	8.96e-12	Intron	TRPS1
cg00435244	8	116113510	rs68117692	8	117051510	0.369	A	T	0.06	6.89	1.05e-11	Intron	TRPS1
cg00435244	8	116113510	rs2316304	8	117051511	0.369	A	T	0.06	6.89	1.05e-11	Intron	TRPS1
cg00435244	8	116113510	rs4612366	8	117051830	0.369	T	C	0.06	6.89	1.05e-11	Intron	TRPS1
cg00435244	8	116113510	rs6990659	8	117051920	0.3696	G	A	0.06	6.91	8.96e-12	Intron	TRPS1
cg00435244	8	116113510	rs2316305	8	117053386	0.3696	G	A	0.06	6.91	8.96e-12	Intron	TRPS1
cg00435244	8	116113510	rs2316306	8	117053506	0.3696	C	T	0.06	6.91	8.96e-12	Intron	TRPS1
cg00435244	8	116113510	rs4876348	8	117054566	0.369	T	C	0.06	6.89	1.05e-11	Intron	TRPS1
cg00435244	8	116113510	rs7006631	8	117054974	0.3696	A	C	0.06	6.91	8.96e-12	Intron	TRPS1
cg00435244	8	116113510	rs7007110	8	117055126	0.3696	C	T	0.06	6.91	8.96e-12	Intron	TRPS1
cg00435244	8	116113510	rs10156333	8	117055269	0.3696	T	C	0.06	6.91	8.96e-12	Intron	TRPS1
cg00435244	8	116113510	rs10808476	8	117056022	0.3701	G	C	0.06	6.98	5.81e-12	Intron	TRPS1
cg00435244	8	116113510	rs10808477	8	117056044	0.3701	A	G	0.06	6.98	5.81e-12	Intron	TRPS1
cg00435244	8	116113510	rs10808478	8	117056191	0.3701	A	G	0.06	6.98	5.81e-12	Intron	TRPS1
cg00435244	8	116113510	rs10808479	8	117056361	0.3701	C	T	0.06	6.98	5.81e-12	Intron	TRPS1
cg00435244	8	116113510	rs10808480	8	117056398	0.3701	G	A	0.06	6.98	5.81e-12	Intron	TRPS1
cg00435244	8	116113510	rs994486	8	117056778	0.3701	T	C	0.06	6.98	5.81e-12	Intron	TRPS1
cg00435244	8	116113510	rs7812463	8	117057714	0.3696	C	T	0.06	6.95	6.82e-12	Intron	TRPS1
cg00435244	8	116113510	rs7830946	8	117057772	0.3696	T	C	0.06	6.95	6.82e-12	Intron	TRPS1
cg00435244	8	116113510	rs7834480	8	117057884	0.3696	T	C	0.06	6.95	6.82e-12	Intron	TRPS1
cg00435244	8	116113510	rs7834654	8	117057958	0.3696	T	C	0.06	6.95	6.82e-12	Intron	TRPS1
cg00435244	8	116113510	rs12056493	8	117057994	0.4605	A	G	0.05	6.27	5.39e-10	Intron	TRPS1
cg00435244	8	116113510	rs991604	8	117058346	0.3696	C	T	0.06	6.95	6.82e-12	Intron	TRPS1
cg00435244	8	116113510	rs4369018	8	117058563	0.3593	A	G	0.06	6.95	7.07e-12	Intron	TRPS1
cg00435244	8	116113510	rs6991315	8	117059756	0.3696	A	G	0.06	6.95	6.82e-12	Intron	TRPS1
cg00435244	8	116113510	rs2223064	8	117061748	0.3696	T	C	0.06	6.95	6.82e-12	Intron	TRPS1
cg00435244	8	116113510	rs6469625	8	117062600	0.3696	A	G	0.06	6.95	6.82e-12	Intron	LOC124902005
cg00435244	8	116113510	rs2205279	8	117065624	0.3696	C	G	0.06	6.95	6.82e-12	Intron	LOC124902005
cg00435244	8	116113510	rs962692	8	117066448	0.3696	T	C	0.06	6.95	6.82e-12	Intron	LOC124902005
cg00435244	8	116113510	rs10955763	8	117068485	0.3712	C	T	0.06	6.94	7.16e-12	Intron	LOC124902005
cg00435244	8	116113510	rs6997637	8	117068939	0.3598	T	C	0.06	6.97	6.03e-12	Intron	LOC124902005
cg00435244	8	116113510	rs13272758	8	117069149	0.3712	G	A	0.06	6.94	7.16e-12	Intron	LOC124902005
cg00435244	8	116113510	rs4876349	8	117070738	0.3701	G	T	0.05	6.8	1.84e-11	Intron	LOC124902005
cg00435244	8	116113510	rs7003396	8	117072069	0.3707	C	T	0.06	6.83	1.58e-11	Intron	LOC124902005
cg00435244	8	116113510	rs12543776	8	117072209	0.3912	T	C	0.05	6.68	4.07e-11	Intron	LOC124902005
cg00435244	8	116113510	rs7833583	8	117072454	0.3696	A	G	0.06	6.86	1.28e-11	Intron	LOC124902005
cg00435244	8	116113510	rs13268803	8	117074106	0.3685	A	C	0.06	6.84	1.46e-11	Intron	LOC124902005
cg00435244	8	116113510	rs13269966	8	117074443	0.3685	A	C	0.06	6.84	1.46e-11	Intron	LOC124902005
cg00435244	8	116113510	rs6987444	8	117076315	0.3701	G	A	0.06	6.83	1.54e-11	Intron	LOC124902005
cg00435244	8	116113510	rs10106842	8	117077523	0.3701	C	T	0.06	6.83	1.54e-11	Intron	LOC124902005
cg00435244	8	116113510	rs10109846	8	117077882	0.3696	A	G	0.05	6.81	1.8e-11	Intron	LOC124902005
cg00435244	8	116113510	rs4410937	8	117078070	0.3701	A	T	0.06	6.83	1.54e-11	Intron	LOC124902005
cg00435244	8	116113510	rs10110767	8	117078597	0.3701	C	G	0.06	6.83	1.54e-11	Intron	LOC124902005
cg00435244	8	116113510	rs10086070	8	117078892	0.3696	G	C	0.05	6.81	1.8e-11	Intron	LOC124902005
cg00435244	8	116113510	rs2316307	8	117082987	0.3685	T	C	0.06	6.84	1.46e-11	Intron	LOC124902005
cg00435244	8	116113510	rs11775004	8	117083812	0.3696	G	A	0.05	6.81	1.8e-11	Intron	LOC124902005
cg00435244	8	116113510	rs1989085	8	117084021	0.3701	C	T	0.06	6.83	1.54e-11	Intron	LOC124902005
cg00435244	8	116113510	rs2049841	8	117087613	0.3685	A	C	0.06	6.84	1.46e-11	Intron	LOC124902005
cg00435244	8	116113510	rs2049842	8	117089514	0.3685	C	T	0.05	6.73	3.07e-11	Intron	LOC124902005
cg00435244	8	116113510	rs1155253	8	117091390	0.369	C	G	0.05	6.68	4.03e-11	Intron	LOC124902005
cg00435244	8	116113510	rs6989040	8	117091970	0.3696	A	G	0.05	6.78	2.13e-11	Intron	LOC124902005
cg00435244	8	116113510	rs2142250	8	117093062	0.3712	C	G	0.05	6.72	3.26e-11	Intron	LOC124902005
cg00435244	8	116113510	rs6469626	8	117095855	0.369	T	C	0.05	6.68	4.03e-11	Intron	LOC124902005
cg00435244	8	116113510	rs6992815	8	117095982	0.3696	T	C	0.05	6.7	3.65e-11	Intron	LOC124902005
cg00435244	8	116113510	rs59811759	8	117097100	0.3956	G	T	0.05	6.47	1.64e-10	Intron	LOC124902005
cg00435244	8	116113510	rs11783273	8	117097306	0.3707	C	A	0.05	6.68	4.24e-11	Intron	LOC124902005
cg00435244	8	116113510	rs6469627	8	117105786	0.3755	A	G	0.05	6.18	9.7e-10	Intron	LOC124902005
cg00435244	8	116113510	rs10505275	8	117106908	0.3999	C	G	0.05	5.88	5.87e-09	Intron	LOC124902005
cg00435244	8	116113510	rs7004124	8	117107236	0.3761	G	C	0.05	6.04	2.24e-09	Intron	LOC124902005
cg00435244	8	116113510	rs4876632	8	117107873	0.3761	T	C	0.05	6.07	1.9e-09	Intron	LOC124902005
cg00435244	8	116113510	rs10955764	8	117108096	0.3755	A	G	0.05	6.18	9.7e-10	Intron	LOC124902005
cg00435244	8	116113510	rs6651218	8	117108188	0.3766	G	C	0.05	6.06	1.95e-09	Intron	LOC124902005
cg00435244	8	116113510	rs719432	8	117108768	0.401	G	T	0.05	5.7	1.61e-08	Intron	LOC124902005
cg00435244	8	116113510	rs9643107	8	117111443	0.3766	G	A	0.05	6.15	1.17e-09	Intron	LOC124902005
cg00435244	8	116113510	rs9643108	8	117111532	0.3766	A	G	0.05	6.15	1.17e-09	Intron	LOC124902005
cg00435244	8	116113510	rs9643109	8	117111630	0.3766	G	C	0.05	6.15	1.17e-09	Intron	LOC124902005
cg00435244	8	116113510	rs4593579	8	117111943	0.3988	G	A	0.05	5.96	3.52e-09	Intron	LOC124902005
cg00435244	8	116113510	rs2316310	8	117112366	0.3772	C	T	0.05	5.92	4.41e-09	Intron	LOC124902005
cg00435244	8	116113510	rs4567068	8	117113215	0.3745	T	C	0.05	6.18	9.41e-10	Intron	LOC124902005
cg00435244	8	116113510	rs1540899	8	117120123	0.3766	G	C	0.05	6.09	1.65e-09	Intron	LOC124902005
cg00435244	8	116113510	rs7837256	8	117120635	0.3772	C	G	0.05	5.95	3.78e-09	Intron	LOC124902005
cg00435244	8	116113510	rs2205269	8	117121662	0.3766	A	T	0.05	6.06	1.95e-09	Intron	LOC124902005
cg00435244	8	116113510	rs7009799	8	117122357	0.3761	T	C	0.05	6.04	2.24e-09	Intron	LOC124902005
cg00435244	8	116113510	rs1574542	8	117122598	0.3761	A	G	0.05	6.04	2.24e-09	Intron	LOC124902005
cg00435244	8	116113510	rs1109537	8	117123012	0.3761	T	C	0.05	6.04	2.24e-09	Intron	LOC124902005
cg00435244	8	116113510	rs7814464	8	117124521	0.3766	T	C	0.05	6.06	1.95e-09	Intron	LOC124902005
cg00435244	8	116113510	rs7011010	8	117126310	0.3777	C	A	0.05	6.03	2.35e-09	Intron	LOC124902005
cg00435244	8	116113510	rs9792120	8	117128202	0.3772	T	C	0.05	5.95	3.78e-09	Intron	LOC124902005
cg00435244	8	116113510	rs10100863	8	117128746	0.3777	G	A	0.05	5.93	4.38e-09	Intron	LOC124902005
cg00435244	8	116113510	rs10090415	8	117128954	0.3777	T	C	0.05	5.89	5.53e-09	Intron	LOC124902005
cg00435244	8	116113510	rs2223059	8	117129410	0.3766	T	C	0.05	5.59	2.97e-08	Intron	LOC124902005
cg00435244	8	116113510	rs10955766	8	117129952	0.3712	C	T	0.05	5.77	1.07e-08	Intron	LOC124902005
cg00435244	8	116113510	rs10755912	8	117130004	0.375	G	A	0.05	5.85	6.95e-09	Intron	LOC124902005
cg00435244	8	116113510	rs6996460	8	117132001	0.3696	T	C	0.05	5.85	6.77e-09	Exon	LOC124902005
cg00435244	8	116113510	rs972395	8	117132729	0.369	T	C	0.05	5.83	7.73e-09	Intron	LOC124902005
cg00037671	20	4089909	rs7000180	8	145068062	0.1174	G	A	-0.08	-5.52	4.51e-08	Promoter	GRINA
cg00037671	20	4089909	rs58404036	8	145069534	0.1174	T	C	-0.08	-5.52	4.51e-08	Intron	GRINA
cg00037671	20	4089909	rs55853893	8	145069806	0.1174	A	G	-0.08	-5.52	4.51e-08	Intron	GRINA
cg00037671	20	4089909	rs56207135	8	145070567	0.1174	C	G	-0.08	-5.52	4.51e-08	Intron	GRINA
cg00037671	20	4089909	rs11779776	8	145072539	0.1174	C	T	-0.08	-5.52	4.51e-08	Intron	GRINA
cg00037671	20	4089909	rs61545625	8	145073663	0.1174	T	C	-0.08	-5.52	4.51e-08	Intron	GRINA
cg00037671	20	4089909	rs62530297	8	145075417	0.1174	C	T	-0.08	-5.52	4.51e-08	Intron	GRINA
cg00037671	20	4089909	rs6985003	8	145075703	0.1174	T	C	-0.08	-5.52	4.51e-08	Intron	GRINA
cg00037671	20	4089909	rs57957974	8	145076529	0.1174	A	C	-0.08	-5.52	4.51e-08	Intron	SPATC1
cg07840258	9	127507587	rs3824414	9	130166857	0.4134	C	T	0.04	6.99	5.11e-12	Promoter	SLC2A8
cg07840258	9	127507587	rs3802364	9	130166957	0.4297	C	T	0.05	7.96	5.18e-15	Promoter	SLC2A8
cg07840258	9	127507587	rs11789887	9	130168840	0.3842	A	G	0.04	6.04	2.22e-09	Promoter	SLC2A8
cg07840258	9	127507587	rs10819289	9	130172319	0.3469	T	A	0.04	6.73	2.98e-11	Distal Intergenic	SLC2A8
cg07840258	9	127507587	rs7866114	9	130173253	0.1916	G	A	0.04	5.67	1.95e-08	Distal Intergenic	SLC2A8
cg07840258	9	127507587	rs7866252	9	130173362	0.3907	G	A	0.05	8.52	6.24e-17	Distal Intergenic	SLC2A8
cg07840258	9	127507587	rs10819290	9	130176331	0.4399	A	C	0.04	6.94	7.55e-12	Distal Intergenic	SLC2A8
cg07840258	9	127507587	rs11793712	9	130181069	0.2565	T	C	0.05	7.08	2.89e-12	Distal Intergenic	ZNF79
cg07840258	9	127507587	rs10987645	9	130181223	0.3902	G	C	0.05	8.65	2.31e-17	Distal Intergenic	ZNF79
cg07840258	9	127507587	rs7035039	9	130187473	0.355	C	G	0.04	6.9	9.94e-12	Promoter	ZNF79
cg07840258	9	127507587	rs10819292	9	130188676	0.355	A	G	0.04	6.9	9.94e-12	Promoter	ZNF79
cg07840258	9	127507587	rs7033779	9	130190810	0.3907	A	T	0.05	8.66	2.08e-17	Intron	ZNF79
cg07840258	9	127507587	rs13292096	9	130191186	0.3907	T	C	0.05	8.66	2.08e-17	5' UTR	ZNF79
cg07840258	9	127507587	rs10739692	9	130192765	0.3907	G	A	0.05	8.66	2.08e-17	Intron	ZNF79
cg07840258	9	127507587	rs4400486	9	130193725	0.3907	A	T	0.05	8.66	2.08e-17	Intron	ZNF79
cg07840258	9	127507587	rs6478773	9	130194487	0.3896	T	C	0.05	8.74	1.1e-17	Intron	ZNF79
cg07840258	9	127507587	rs4400487	9	130194495	0.3544	T	C	0.04	6.93	7.72e-12	Intron	ZNF79
cg07840258	9	127507587	rs4641163	9	130194536	0.3907	C	G	0.05	8.66	2.08e-17	Intron	ZNF79
cg07840258	9	127507587	rs4628351	9	130196233	0.3907	T	G	0.05	8.66	2.08e-17	Intron	ZNF79
cg07840258	9	127507587	rs10987650	9	130196537	0.3907	T	C	0.05	8.66	2.08e-17	Intron	ZNF79
cg07840258	9	127507587	rs7870737	9	130196807	0.3907	A	G	0.05	8.66	2.08e-17	Intron	ZNF79
cg07840258	9	127507587	rs3923309	9	130197185	0.3907	C	T	0.05	8.66	2.08e-17	Intron	ZNF79
cg07840258	9	127507587	rs4504745	9	130197414	0.3918	G	A	0.05	8.59	3.59e-17	Exon	ZNF79
cg07840258	9	127507587	rs7853047	9	130198100	0.3907	G	A	0.05	8.66	2.08e-17	Intron	ZNF79
cg07840258	9	127507587	rs4500179	9	130198342	0.3907	A	G	0.05	8.66	2.08e-17	Intron	ZNF79
cg07840258	9	127507587	rs6478776	9	130198866	0.3555	T	C	0.04	6.83	1.57e-11	Intron	SNORA65
cg07840258	9	127507587	rs6478777	9	130199370	0.3907	G	A	0.05	8.66	2.08e-17	Intron	SNORA65
cg07840258	9	127507587	rs6478780	9	130200433	0.3907	A	C	0.05	8.66	2.08e-17	Intron	SNORA65
cg07840258	9	127507587	rs6478781	9	130200450	0.3907	A	G	0.05	8.66	2.08e-17	Intron	SNORA65
cg07840258	9	127507587	rs7851991	9	130201265	0.3907	C	T	0.05	8.66	2.08e-17	Intron	SNORA65
cg07840258	9	127507587	rs7869101	9	130201525	0.3907	A	G	0.05	8.66	2.08e-17	Intron	SNORA65
cg07840258	9	127507587	rs111385871	9	130201678	0.3907	G	A	0.05	8.66	2.08e-17	Intron	SNORA65
cg07840258	9	127507587	rs7869823	9	130202089	0.3907	A	G	0.05	8.66	2.08e-17	Intron	SNORA65
cg07840258	9	127507587	rs7859457	9	130202596	0.3907	C	T	0.05	8.66	2.08e-17	Intron	SNORA65
cg07840258	9	127507587	rs7046875	9	130202907	0.3907	A	G	0.05	8.66	2.08e-17	Intron	SNORA65
cg07840258	9	127507587	rs6478784	9	130203840	0.3907	C	G	0.05	8.66	2.08e-17	Intron	SNORA65
cg07840258	9	127507587	rs2265686	9	130204776	0.3555	G	T	0.04	6.86	1.25e-11	Intron	SNORA65
cg07840258	9	127507587	rs2247905	9	130208376	0.3891	G	T	0.05	8.95	1.91e-18	Promoter	SNORA65
cg07840258	9	127507587	rs2247781	9	130208924	0.3891	C	T	0.05	8.95	1.91e-18	Promoter	SNORA65
cg07840258	9	127507587	rs7847465	9	130209078	0.2143	T	C	0.04	5.66	2.06e-08	Promoter	SNORA65
cg07840258	9	127507587	rs1139400	9	130210111	0.3918	C	T	0.05	8.89	3.22e-18	Promoter	SNORA65
cg07840258	9	127507587	rs2247573	9	130210946	0.3539	G	A	0.04	7.32	5.55e-13	Promoter	SNORA65
cg07840258	9	127507587	rs2247322	9	130212876	0.3896	A	T	0.05	8.96	1.76e-18	Promoter	RPL12
cg07840258	9	127507587	rs2247310	9	130213110	0.3485	C	G	0.04	7.34	4.57e-13	Promoter	RPL12
cg07840258	9	127507587	rs2247303	9	130213298	0.3896	G	A	0.05	8.96	1.76e-18	Promoter	RPL12
cg07840258	9	127507587	rs4837153	9	130213422	0.2143	C	T	0.04	5.66	2.06e-08	Promoter	RPL12
cg07840258	9	127507587	rs2244624	9	130213508	0.3891	G	A	0.05	8.95	1.91e-18	Promoter	RPL12
cg07840258	9	127507587	rs3808831	9	130214414	0.2143	T	C	0.04	5.66	2.06e-08	Promoter	LRSAM1
cg07840258	9	127507587	rs2244468	9	130215279	0.3864	A	G	0.05	8.99	1.41e-18	Promoter	LRSAM1
cg07840258	9	127507587	rs10987655	9	130218372	0.2105	T	G	0.04	5.68	1.77e-08	Promoter	LRSAM1
cg07840258	9	127507587	rs12352893	9	130218727	0.211	G	C	0.04	5.67	1.86e-08	Promoter	LRSAM1
cg07840258	9	127507587	rs4837154	9	130219409	0.21	T	G	0.04	5.6	2.77e-08	Promoter	LRSAM1
cg07840258	9	127507587	rs2243906	9	130219669	0.388	T	C	0.05	9.01	1.17e-18	5' UTR	LRSAM1
cg07840258	9	127507587	rs2243903	9	130219743	0.3891	C	T	0.05	9.02	1.08e-18	Exon	LRSAM1
cg07840258	9	127507587	rs2243898	9	130219990	0.3593	C	G	0.05	8.44	1.23e-16	Exon	LRSAM1
cg07840258	9	127507587	rs2243784	9	130220956	0.3864	A	G	0.05	8.92	2.37e-18	Promoter	LRSAM1
cg07840258	9	127507587	rs2243767	9	130221388	0.3864	C	T	0.05	8.92	2.37e-18	Promoter	LRSAM1
cg07840258	9	127507587	rs7849608	9	130221532	0.21	A	G	0.04	5.67	1.96e-08	Promoter	LRSAM1
cg07840258	9	127507587	rs2488899	9	130221698	0.3864	A	T	0.05	8.92	2.37e-18	Promoter	LRSAM1
cg07840258	9	127507587	rs2243663	9	130222452	0.3864	G	A	0.05	8.92	2.37e-18	Promoter	LRSAM1
cg07840258	9	127507587	rs7858206	9	130223822	0.21	A	G	0.04	5.67	1.96e-08	Promoter	LRSAM1
cg07840258	9	127507587	rs2254437	9	130224927	0.3858	G	A	0.05	8.99	1.41e-18	Promoter	LRSAM1
cg07840258	9	127507587	rs2243608	9	130226909	0.3853	C	T	0.05	8.94	2.09e-18	Intron	LRSAM1
cg07840258	9	127507587	rs2254041	9	130228444	0.3853	T	C	0.05	8.94	2.09e-18	Intron	LRSAM1
cg07840258	9	127507587	rs2253929	9	130228511	0.3847	C	T	0.05	8.96	1.83e-18	Intron	LRSAM1
cg07840258	9	127507587	rs2253928	9	130228569	0.3853	G	C	0.05	8.94	2.09e-18	Intron	LRSAM1
cg07840258	9	127507587	rs2253806	9	130229652	0.4042	G	A	0.05	8.83	5.04e-18	Intron	LRSAM1
cg07840258	9	127507587	rs2253669	9	130230514	0.3891	G	A	0.05	8.8	6.67e-18	Exon	LRSAM1
cg07840258	9	127507587	rs2253639	9	130231417	0.3853	G	A	0.05	8.89	3.24e-18	Intron	LRSAM1
cg07840258	9	127507587	rs10760487	9	130232738	0.2348	G	A	0.05	7.35	4.26e-13	Intron	LRSAM1
cg07840258	9	127507587	rs12340522	9	130233993	0.2083	T	G	0.04	5.51	4.56e-08	Intron	LRSAM1
cg07840258	9	127507587	rs12340560	9	130234154	0.3842	C	G	0.05	9.01	1.18e-18	Intron	LRSAM1
cg07840258	9	127507587	rs2995822	9	130234634	0.1742	G	A	0.04	5.53	4.19e-08	Intron	LRSAM1
cg07840258	9	127507587	rs2995823	9	130234647	0.3837	G	A	0.05	9	1.23e-18	Intron	LRSAM1
cg07840258	9	127507587	rs10760488	9	130235452	0.2083	C	T	0.04	5.51	4.56e-08	Intron	LRSAM1
cg07840258	9	127507587	rs10819296	9	130235897	0.2083	A	G	0.04	5.51	4.56e-08	Intron	LRSAM1
cg07840258	9	127507587	rs773171244	9	130236243	0.1742	A	G	0.04	5.53	4.19e-08	Intron	LRSAM1
cg07840258	9	127507587	rs2250184	9	130236589	0.1742	G	C	0.04	5.53	4.19e-08	Intron	LRSAM1
cg07840258	9	127507587	rs2250021	9	130238122	0.1742	C	T	0.04	5.53	4.19e-08	Intron	LRSAM1
cg07840258	9	127507587	rs2250020	9	130238160	0.1742	T	C	0.04	5.53	4.19e-08	Intron	LRSAM1
cg07840258	9	127507587	rs2249940	9	130238540	0.3831	G	A	0.05	9.05	8.56e-19	Intron	LRSAM1
cg07840258	9	127507587	rs2249803	9	130239900	0.178	A	G	0.04	5.61	2.6e-08	Intron	LRSAM1
cg07840258	9	127507587	rs2249791	9	130240319	0.2955	A	G	-0.04	-5.77	1.11e-08	Intron	LRSAM1
cg07840258	9	127507587	rs139588129	9	130240781	0.02652	T	G	0.11	5.95	3.71e-09	Intron	LRSAM1
cg07840258	9	127507587	rs2249649	9	130240980	0.296	A	G	-0.04	-5.77	1.1e-08	Intron	LRSAM1
cg07840258	9	127507587	rs1539569	9	130241822	0.296	T	C	-0.04	-5.77	1.1e-08	Intron	LRSAM1
cg07840258	9	127507587	rs77035202	9	130242053	0.0368	G	A	0.09	5.72	1.42e-08	Intron	LRSAM1
cg07840258	9	127507587	rs1539568	9	130242109	0.178	T	C	0.04	5.61	2.6e-08	Intron	LRSAM1
cg07840258	9	127507587	rs1539567	9	130242166	0.2955	A	G	-0.04	-5.73	1.38e-08	3' UTR	LRSAM1
cg07840258	9	127507587	rs2246600	9	130243846	0.178	A	G	0.04	5.61	2.6e-08	Intron	LRSAM1
cg07840258	9	127507587	rs2246579	9	130244255	0.3858	T	A	0.05	9.06	7.61e-19	Intron	LRSAM1
cg07840258	9	127507587	rs7875862	9	130245545	0.178	C	G	0.04	5.61	2.6e-08	Intron	LRSAM1
cg07840258	9	127507587	rs2246375	9	130245787	0.178	T	G	0.04	5.61	2.6e-08	Intron	LRSAM1
cg07840258	9	127507587	rs2246270	9	130246564	0.4324	T	C	0.04	7.06	3.3e-12	Intron	LRSAM1
cg07840258	9	127507587	rs76654972	9	130248301	0.03626	A	G	0.1	6.01	2.67e-09	Promoter	LRSAM1
cg07840258	9	127507587	rs2243464	9	130248366	0.1775	A	T	0.04	5.74	1.29e-08	Promoter	LRSAM1
cg07840258	9	127507587	rs2246011	9	130248885	0.3469	C	T	0.04	6.65	5.02e-11	Promoter	LRSAM1
cg07840258	9	127507587	rs2246000	9	130249144	0.3842	T	C	0.05	9.18	2.68e-19	Promoter	LRSAM1
cg07840258	9	127507587	rs2245677	9	130251512	0.1742	A	G	0.04	5.53	4.09e-08	Promoter	LRSAM1
cg07840258	9	127507587	rs142664400	9	130252100	0.03626	C	T	0.1	6.01	2.67e-09	Promoter	LRSAM1
cg07840258	9	127507587	rs1547841	9	130252250	0.4313	C	G	0.04	6.95	6.74e-12	Promoter	LRSAM1
cg07840258	9	127507587	rs1547840	9	130252307	0.1748	T	A	0.04	5.63	2.33e-08	Promoter	LRSAM1
cg07840258	9	127507587	rs79366656	9	130253354	0.0368	A	G	0.09	5.72	1.42e-08	Intron	LRSAM1
cg07840258	9	127507587	rs1539564	9	130253931	0.178	G	A	0.04	5.62	2.5e-08	Intron	LRSAM1
cg07840258	9	127507587	rs117236749	9	130255806	0.0368	T	C	0.09	5.72	1.42e-08	3' UTR	LRSAM1
cg07840258	9	127507587	rs2249282	9	130255810	0.296	C	G	-0.04	-5.77	1.1e-08	3' UTR	LRSAM1
cg07840258	9	127507587	rs117991222	9	130256806	0.0368	T	C	0.09	5.72	1.42e-08	3' UTR	LRSAM1
cg07840258	9	127507587	rs2798429	9	130257191	0.1753	A	G	0.05	5.86	6.39e-09	Intron	LRSAM1
cg07840258	9	127507587	rs2798428	9	130257205	0.3831	A	G	0.05	9.13	4.07e-19	Intron	LRSAM1
cg07840258	9	127507587	rs117245029	9	130257936	0.0368	G	A	0.09	5.72	1.42e-08	Intron	LRSAM1
cg07840258	9	127507587	rs2249052	9	130258160	0.178	T	A	0.04	5.63	2.4e-08	Intron	LRSAM1
cg07840258	9	127507587	rs3802361	9	130258410	0.0368	T	C	0.09	5.72	1.42e-08	Intron	LRSAM1
cg07840258	9	127507587	rs118029779	9	130259310	0.0368	C	T	0.09	5.72	1.42e-08	Intron	LRSAM1
cg07840258	9	127507587	rs2248822	9	130259618	0.2949	A	C	-0.04	-5.7	1.58e-08	Exon	LRSAM1
cg07840258	9	127507587	rs117433711	9	130260660	0.0368	C	A	0.09	5.72	1.42e-08	Intron	LRSAM1
cg07840258	9	127507587	rs2248725	9	130260788	0.164	T	C	0.05	5.74	1.3e-08	Intron	LRSAM1
cg07840258	9	127507587	rs117155357	9	130260890	0.0368	A	G	0.09	5.72	1.42e-08	Intron	LRSAM1
cg07840258	9	127507587	rs148597126	9	130261848	0.0368	T	C	0.09	5.72	1.42e-08	Intron	LRSAM1
cg07840258	9	127507587	rs2488903	9	130262076	0.3701	G	A	0.05	9.08	6.32e-19	Intron	LRSAM1
cg07840258	9	127507587	rs62584998	9	130262434	0.1634	T	G	0.05	5.76	1.18e-08	Intron	LRSAM1
cg07840258	9	127507587	rs2265688	9	130262597	0.3707	A	G	0.05	9.09	6.04e-19	Intron	LRSAM1
cg07840258	9	127507587	rs117290903	9	130266376	0.03626	A	T	0.1	6.01	2.67e-09	Distal Intergenic	NIBAN2
cg07840258	9	127507587	rs2245445	9	130266399	0.164	A	G	0.05	5.73	1.37e-08	Distal Intergenic	NIBAN2
cg07840258	9	127507587	rs2245389	9	130266566	0.3712	G	A	0.05	9.02	1.04e-18	Distal Intergenic	NIBAN2
cg07840258	9	127507587	rs2245284	9	130267563	0.1705	C	T	0.04	5.69	1.73e-08	Distal Intergenic	NIBAN2
cg07840258	9	127507587	rs1277	9	130267777	0.4205	G	C	0.04	7.05	3.59e-12	3' UTR	NIBAN2
cg07840258	9	127507587	rs1276	9	130267856	0.1634	C	G	0.05	5.8	9.02e-09	3' UTR	NIBAN2
cg07840258	9	127507587	rs2245051	9	130269786	0.3707	G	A	0.05	9.21	2.17e-19	Intron	NIBAN2
cg07840258	9	127507587	rs113843607	9	130270834	0.03517	A	G	0.09	5.77	1.06e-08	Intron	NIBAN2
cg07840258	9	127507587	rs2244843	9	130271666	0.375	G	A	0.05	8.94	2.09e-18	Intron	NIBAN2
cg07840258	9	127507587	rs117101171	9	130271773	0.0368	T	G	0.09	5.72	1.42e-08	Intron	NIBAN2
cg07840258	9	127507587	rs117495875	9	130271966	0.03842	T	C	0.1	6.55	9.74e-11	Intron	NIBAN2
cg07840258	9	127507587	rs2244830	9	130272006	0.3945	G	T	0.05	9.01	1.19e-18	Intron	NIBAN2
cg07840258	9	127507587	rs145054986	9	130273899	0.03734	C	T	0.09	5.89	5.49e-09	Intron	NIBAN2
cg07840258	9	127507587	rs2417051	9	130274211	0.3712	G	A	0.05	9.18	2.68e-19	Intron	NIBAN2
cg07840258	9	127507587	rs2417052	9	130274213	0.3712	C	A	0.05	9.18	2.68e-19	Intron	NIBAN2
cg07840258	9	127507587	rs2263588	9	130274217	0.3712	C	A	0.05	9.18	2.68e-19	Intron	NIBAN2
cg07840258	9	127507587	rs117083399	9	130274239	0.03734	C	T	0.09	5.89	5.49e-09	Intron	NIBAN2
cg07840258	9	127507587	rs78245800	9	130274534	0.03734	T	C	0.09	5.89	5.49e-09	Intron	NIBAN2
cg07840258	9	127507587	rs117434919	9	130276018	0.03734	A	G	0.09	5.89	5.49e-09	Intron	NIBAN2
cg07840258	9	127507587	rs118188329	9	130276143	0.03788	A	G	0.09	5.56	3.57e-08	Intron	NIBAN2
cg07840258	9	127507587	rs139117578	9	130276203	0.03734	A	G	0.09	5.89	5.49e-09	Promoter	NIBAN2
cg07840258	9	127507587	rs7847053	9	130276276	0.03734	G	A	0.09	5.89	5.49e-09	Promoter	NIBAN2
cg07840258	9	127507587	rs144490121	9	130276574	0.03734	T	A	0.09	5.89	5.49e-09	Promoter	NIBAN2
cg07840258	9	127507587	rs143566451	9	130276837	0.03734	T	C	0.09	5.89	5.49e-09	Promoter	NIBAN2
cg07840258	9	127507587	rs7850940	9	130276967	0.03734	G	C	0.09	5.89	5.49e-09	Promoter	NIBAN2
cg07840258	9	127507587	rs79501174	9	130277094	0.03734	C	T	0.09	5.89	5.49e-09	Promoter	NIBAN2
cg07840258	9	127507587	rs138797775	9	130277168	0.03734	T	C	0.09	5.89	5.49e-09	Promoter	NIBAN2
cg07840258	9	127507587	rs141972654	9	130277169	0.03734	G	A	0.09	5.89	5.49e-09	Promoter	NIBAN2
cg07840258	9	127507587	rs117659379	9	130277308	0.03734	C	T	0.09	5.89	5.49e-09	Promoter	NIBAN2
cg07840258	9	127507587	rs117142638	9	130277517	0.03734	T	C	0.09	5.89	5.49e-09	Promoter	NIBAN2
cg07840258	9	127507587	rs7870767	9	130277565	0.3339	T	C	0.04	6.88	1.13e-11	Promoter	NIBAN2
cg07840258	9	127507587	rs148772210	9	130277667	0.03734	A	G	0.09	5.89	5.49e-09	Promoter	NIBAN2
cg07840258	9	127507587	rs7871133	9	130277763	0.3339	A	G	0.04	6.88	1.13e-11	Promoter	NIBAN2
cg07840258	9	127507587	rs183257490	9	130277985	0.03734	G	A	0.09	5.89	5.49e-09	Promoter	NIBAN2
cg07840258	9	127507587	rs117432531	9	130278124	0.03734	G	A	0.09	5.89	5.49e-09	Promoter	NIBAN2
cg07840258	9	127507587	rs147172921	9	130278310	0.03734	C	G	0.09	5.89	5.49e-09	Promoter	NIBAN2
cg07840258	9	127507587	rs140265099	9	130278391	0.03734	G	A	0.09	5.89	5.49e-09	Promoter	NIBAN2
cg07840258	9	127507587	rs151216890	9	130278578	0.03734	C	G	0.09	5.89	5.49e-09	Promoter	NIBAN2
cg07840258	9	127507587	rs2255128	9	130278634	0.3339	A	G	0.04	6.88	1.13e-11	Promoter	NIBAN2
cg07840258	9	127507587	rs2255127	9	130278667	0.3712	T	C	0.05	9.18	2.68e-19	Promoter	NIBAN2
cg07840258	9	127507587	rs141031647	9	130278822	0.03734	T	C	0.09	5.89	5.49e-09	Promoter	NIBAN2
cg07840258	9	127507587	rs145036246	9	130278997	0.03734	T	C	0.09	5.89	5.49e-09	Promoter	NIBAN2
cg07840258	9	127507587	rs140486340	9	130279255	0.03734	A	G	0.09	5.89	5.49e-09	Promoter	NIBAN2
cg07840258	9	127507587	rs74814534	9	130279811	0.03734	G	T	0.09	5.89	5.49e-09	Promoter	NIBAN2
cg07840258	9	127507587	rs117609831	9	130280308	0.03896	A	C	0.09	5.74	1.29e-08	Promoter	NIBAN2
cg07840258	9	127507587	rs2254868	9	130280589	0.3328	A	G	0.04	6.82	1.7e-11	Promoter	NIBAN2
cg07840258	9	127507587	rs117317544	9	130280808	0.03734	T	C	0.09	5.89	5.49e-09	Promoter	NIBAN2
cg07840258	9	127507587	rs2806716	9	130281190	0.3701	C	T	0.05	9.12	4.8e-19	Promoter	NIBAN2
cg07840258	9	127507587	rs116892242	9	130281758	0.03734	A	G	0.09	5.89	5.49e-09	Promoter	NIBAN2
cg07840258	9	127507587	rs117926402	9	130282170	0.03734	A	G	0.09	5.89	5.49e-09	Promoter	NIBAN2
cg07840258	9	127507587	rs2254714	9	130282310	0.3707	G	A	0.05	9.07	7.15e-19	Intron	NIBAN2
cg07840258	9	127507587	rs2254622	9	130282839	0.4205	G	T	0.04	6.87	1.18e-11	Intron	NIBAN2
cg07840258	9	127507587	rs116966833	9	130283203	0.03734	C	T	0.09	5.89	5.49e-09	Intron	NIBAN2
cg07840258	9	127507587	rs118189328	9	130283652	0.03734	A	G	0.09	5.89	5.49e-09	Intron	NIBAN2
cg07840258	9	127507587	rs75249885	9	130284303	0.03734	C	G	0.09	5.89	5.49e-09	Intron	NIBAN2
cg07840258	9	127507587	rs117788926	9	130284362	0.03734	A	G	0.09	5.89	5.49e-09	Intron	NIBAN2
cg07840258	9	127507587	rs2251551	9	130284652	0.3404	G	C	0.04	6.74	2.79e-11	Intron	NIBAN2
cg07840258	9	127507587	rs2251409	9	130286150	0.342	G	A	0.04	6.83	1.51e-11	Intron	NIBAN2
cg07840258	9	127507587	rs1891732	9	130286428	0.342	A	G	0.04	6.83	1.51e-11	Intron	NIBAN2
cg07840258	9	127507587	rs117886140	9	130286575	0.03734	T	C	0.09	5.89	5.49e-09	Promoter	NIBAN2
cg07840258	9	127507587	rs3765601	9	130287472	0.03842	T	G	0.09	5.87	5.97e-09	Promoter	NIBAN2
cg07840258	9	127507587	rs117002236	9	130288871	0.03571	T	C	0.1	6.39	2.59e-10	Promoter	NIBAN2
cg07840258	9	127507587	rs78497287	9	130289020	0.03571	A	G	0.1	6.39	2.59e-10	Promoter	NIBAN2
cg07840258	9	127507587	rs2251106	9	130289164	0.3366	T	C	0.04	6.82	1.68e-11	Promoter	NIBAN2
cg07840258	9	127507587	rs2243558	9	130289615	0.3723	G	C	0.05	9.16	3.25e-19	Promoter	NIBAN2
cg07840258	9	127507587	rs2243557	9	130290014	0.3252	G	C	0.04	6	2.9e-09	Promoter	NIBAN2
cg07840258	9	127507587	rs75021816	9	130291494	0.03842	C	G	0.1	6.68	4.1e-11	Promoter	NIBAN2
cg07840258	9	127507587	rs7852611	9	130292583	0.03896	A	G	0.1	6.29	4.86e-10	Intron	NIBAN2
cg07840258	9	127507587	rs74812405	9	130294913	0.03896	A	C	0.1	6.29	4.86e-10	Intron	NIBAN2
cg07840258	9	127507587	rs2247618	9	130295165	0.4356	T	C	0.04	6.37	3.03e-10	Intron	NIBAN2
cg07840258	9	127507587	rs111709904	9	130295614	0.03896	C	T	0.1	6.29	4.86e-10	Intron	NIBAN2
cg07840258	9	127507587	rs74739969	9	130296066	0.03896	A	G	0.1	6.29	4.86e-10	Intron	NIBAN2
cg07840258	9	127507587	rs2247397	9	130296881	0.4378	G	A	0.04	6.41	2.28e-10	Intron	NIBAN2
cg07840258	9	127507587	rs77000065	9	130298890	0.05303	T	C	0.09	7.04	3.85e-12	Intron	NIBAN2
cg07840258	9	127507587	rs2246826	9	130301631	0.4264	T	G	0.03	5.63	2.4e-08	Intron	NIBAN2
cg07840258	9	127507587	rs7041174	9	130301887	0.04113	C	G	0.09	5.98	3.13e-09	Intron	NIBAN2
cg07840258	9	127507587	rs7041097	9	130301983	0.05032	A	C	0.08	6.26	6.07e-10	Intron	NIBAN2
cg07840258	9	127507587	rs2488897	9	130303240	0.4475	G	A	0.04	6.16	1.06e-09	Intron	NIBAN2
cg07840258	9	127507587	rs2246653	9	130303385	0.4259	C	G	0.04	5.82	8.02e-09	Intron	NIBAN2
cg07840258	9	127507587	rs146110445	9	130305451	0.0395	G	A	0.09	5.96	3.5e-09	Intron	NIBAN2
cg07840258	9	127507587	rs79666917	9	130305918	0.03896	T	C	0.1	6.35	3.45e-10	Intron	NIBAN2
cg07840258	9	127507587	rs75542608	9	130307700	0.0395	A	G	0.09	5.96	3.5e-09	Intron	NIBAN2
cg07840258	9	127507587	rs7033360	9	130308439	0.4291	T	C	0.03	5.55	3.78e-08	Intron	NIBAN2
cg07840258	9	127507587	rs1891729	9	130309024	0.4432	T	C	0.04	6.1	1.55e-09	Intron	NIBAN2
cg07840258	9	127507587	rs1891731	9	130309196	0.4432	G	A	0.04	6.1	1.55e-09	Intron	NIBAN2
cg07840258	9	127507587	rs7049034	9	130309249	0.4432	G	A	0.04	6.1	1.55e-09	Intron	NIBAN2
cg07840258	9	127507587	rs10125340	9	130309668	0.4426	T	C	0.04	6.14	1.2e-09	Intron	NIBAN2
cg07840258	9	127507587	rs10122213	9	130309839	0.4513	G	A	0.04	6.08	1.72e-09	Intron	NIBAN2
cg07840258	9	127507587	rs2076904	9	130310173	0.4291	A	G	0.03	5.58	3.24e-08	Intron	NIBAN2
cg07840258	9	127507587	rs7850578	9	130310332	0.4291	C	T	0.03	5.58	3.24e-08	Intron	NIBAN2
cg07840258	9	127507587	rs7850582	9	130310335	0.4297	C	T	0.03	5.64	2.24e-08	Intron	NIBAN2
cg07840258	9	127507587	rs2000272	9	130310535	0.4275	T	C	0.03	5.69	1.67e-08	Intron	NIBAN2
cg07840258	9	127507587	rs7854003	9	130310834	0.2484	G	A	0.04	6.35	3.39e-10	Intron	NIBAN2
cg07840258	9	127507587	rs77677413	9	130311025	0.04383	C	T	0.09	6.33	3.93e-10	Intron	NIBAN2
cg07840258	9	127507587	rs7035401	9	130313173	0.1531	G	A	0.05	6.88	1.1e-11	Intron	NIBAN2
cg07840258	9	127507587	rs78407932	9	130313396	0.05898	A	G	0.08	6.54	1.04e-10	Intron	NIBAN2
cg07840258	9	127507587	rs79858125	9	130313498	0.05898	C	T	0.08	6.54	1.04e-10	Intron	NIBAN2
cg07840258	9	127507587	rs74822254	9	130314150	0.05952	G	C	0.08	6.44	1.89e-10	Intron	NIBAN2
cg07840258	9	127507587	rs78633697	9	130314463	0.05898	G	C	0.08	6.54	1.04e-10	Intron	NIBAN2
cg07840258	9	127507587	rs74469206	9	130314806	0.05952	C	T	0.08	6.44	1.89e-10	Intron	NIBAN2
cg07840258	9	127507587	rs77669280	9	130315496	0.05898	A	G	0.08	6.6	6.84e-11	Intron	NIBAN2
cg07840258	9	127507587	rs78658239	9	130316152	0.05898	A	G	0.08	6.6	6.84e-11	Intron	NIBAN2
cg07840258	9	127507587	rs73668506	9	130316352	0.05898	A	G	0.08	6.6	6.84e-11	Intron	NIBAN2
cg07840258	9	127507587	rs147381912	9	130316908	0.05952	C	T	0.08	6.51	1.25e-10	Intron	NIBAN2
cg07840258	9	127507587	rs2253455	9	130317029	0.2343	G	A	0.04	5.58	3.17e-08	Intron	NIBAN2
cg07840258	9	127507587	rs79640188	9	130317865	0.0579	C	A	0.08	6.75	2.54e-11	Intron	NIBAN2
cg07840258	9	127507587	rs79922973	9	130317968	0.0579	G	A	0.08	6.75	2.54e-11	Intron	NIBAN2
cg07840258	9	127507587	rs76295919	9	130318476	0.05736	T	C	0.09	6.78	2.14e-11	Intron	NIBAN2
cg07840258	9	127507587	rs2253135	9	130319560	0.2338	G	A	0.04	5.65	2.14e-08	Intron	NIBAN2
cg07840258	9	127507587	rs77386978	9	130319568	0.0579	T	C	0.08	6.75	2.54e-11	Intron	NIBAN2
cg07840258	9	127507587	rs2252968	9	130321117	0.3512	C	T	0.04	6.6	7.09e-11	Intron	NIBAN2
cg07840258	9	127507587	rs4837164	9	130322124	0.06169	G	A	0.08	6.86	1.23e-11	Intron	NIBAN2
cg07840258	9	127507587	rs6478786	9	130322792	0.06169	G	T	0.08	6.86	1.23e-11	Intron	NIBAN2
cg07840258	9	127507587	rs2252730	9	130323485	0.4486	T	G	0.04	6.17	1e-09	Exon	NIBAN2
cg07840258	9	127507587	rs75147831	9	130323627	0.06115	A	G	0.08	6.88	1.11e-11	Intron	NIBAN2
cg07840258	9	127507587	rs79502468	9	130324152	0.06115	A	G	0.08	6.88	1.11e-11	Intron	NIBAN2
cg07840258	9	127507587	rs2249710	9	130325264	0.454	C	T	0.04	6.38	2.76e-10	Intron	NIBAN2
cg07840258	9	127507587	rs2249706	9	130325323	0.4513	T	G	0.04	6.16	1.07e-09	Intron	NIBAN2
cg07840258	9	127507587	rs79272185	9	130326240	0.06061	A	G	0.09	7.11	2.38e-12	Intron	NIBAN2
cg07840258	9	127507587	rs74694562	9	130326878	0.06061	A	G	0.09	7.11	2.38e-12	Intron	NIBAN2
cg07840258	9	127507587	rs2249453	9	130327265	0.4481	G	C	0.04	6.17	1.02e-09	Intron	NIBAN2
cg07840258	9	127507587	rs2249215	9	130328655	0.3431	C	A	0.04	7.21	1.13e-12	Promoter	NIBAN2
cg07840258	9	127507587	rs2249110	9	130329655	0.4513	C	T	0.04	6.32	4.1e-10	Promoter	NIBAN2
cg07840258	9	127507587	rs77027184	9	130330082	0.06061	G	T	0.09	7.11	2.38e-12	Promoter	NIBAN2
cg07840258	9	127507587	rs2249008	9	130330548	0.3523	G	A	0.04	7.12	2.13e-12	Promoter	NIBAN2
cg07840258	9	127507587	rs2249006	9	130330607	0.3517	G	C	0.04	7.1	2.48e-12	Promoter	NIBAN2
cg07840258	9	127507587	rs116853240	9	130331096	0.05844	T	C	0.09	6.98	5.73e-12	Promoter	NIBAN2
cg07840258	9	127507587	rs79903102	9	130331753	0.06061	C	G	0.09	7.11	2.38e-12	Promoter	NIBAN2
cg07840258	9	127507587	rs10046910	9	130331884	0.3501	A	T	0.04	7.01	4.73e-12	Promoter	NIBAN2
cg07840258	9	127507587	rs76325570	9	130332059	0.06061	A	G	0.09	7.11	2.38e-12	Promoter	NIBAN2
cg07840258	9	127507587	rs74982140	9	130332386	0.06061	T	G	0.09	7.11	2.38e-12	Promoter	NIBAN2
cg07840258	9	127507587	rs10987688	9	130332760	0.4594	A	G	0.03	6.07	1.86e-09	Promoter	NIBAN2
cg07840258	9	127507587	rs3927766	9	130333320	0.3501	T	C	0.04	7.01	4.73e-12	Promoter	NIBAN2
cg07840258	9	127507587	rs77118002	9	130333371	0.06061	A	G	0.09	7.11	2.38e-12	Promoter	NIBAN2
cg07840258	9	127507587	rs141770488	9	130333376	0.06061	C	T	0.09	7.11	2.38e-12	Promoter	NIBAN2
cg07840258	9	127507587	rs61676935	9	130333776	0.06115	G	A	0.09	7.09	2.66e-12	Promoter	NIBAN2
cg07840258	9	127507587	rs4240418	9	130334178	0.3593	C	T	0.04	6.7	3.55e-11	Promoter	NIBAN2
cg07840258	9	127507587	rs79805459	9	130335102	0.06061	C	T	0.09	7.11	2.38e-12	Intron	NIBAN2
cg07840258	9	127507587	rs75334938	9	130335139	0.06061	G	C	0.09	7.11	2.38e-12	Intron	NIBAN2
cg07840258	9	127507587	rs7855070	9	130335511	0.3496	G	T	0.04	7.01	4.49e-12	Intron	NIBAN2
cg07840258	9	127507587	rs79477111	9	130337054	0.06061	C	T	0.09	7.11	2.38e-12	Intron	NIBAN2
cg07840258	9	127507587	rs1316876	9	130337084	0.3501	G	A	0.04	7.01	4.73e-12	Intron	NIBAN2
cg07840258	9	127507587	rs7870415	9	130337593	0.06115	G	A	0.09	7.09	2.66e-12	Intron	NIBAN2
cg07840258	9	127507587	rs77647285	9	130337649	0.06061	A	G	0.09	7.11	2.38e-12	Intron	NIBAN2
cg07840258	9	127507587	rs73607760	9	130337978	0.06115	T	C	0.09	7.09	2.66e-12	Intron	NIBAN2
cg07840258	9	127507587	rs78684043	9	130338097	0.06006	G	C	0.09	7.13	1.99e-12	Intron	NIBAN2
cg07840258	9	127507587	rs75217699	9	130338210	0.06061	C	T	0.09	7.11	2.38e-12	Intron	NIBAN2
cg07840258	9	127507587	rs4269634	9	130338277	0.4589	A	G	0.03	6.11	1.44e-09	Promoter	NIBAN2
cg07840258	9	127507587	rs4532699	9	130338333	0.3496	A	G	0.04	7.01	4.45e-12	Promoter	NIBAN2
cg07840258	9	127507587	rs4532699	9	130338333	0.06169	T	A	0.09	7.11	2.3e-12	Promoter	NIBAN2
cg07840258	9	127507587	rs4620390	9	130338568	0.3517	C	G	0.04	7.05	3.4e-12	Promoter	NIBAN2
cg07840258	9	127507587	rs7875176	9	130338769	0.06169	T	G	0.09	7.11	2.3e-12	Promoter	NIBAN2
cg07840258	9	127507587	rs75933032	9	130338913	0.06169	T	C	0.09	7.11	2.3e-12	Promoter	NIBAN2
cg07840258	9	127507587	rs74541838	9	130339530	0.06169	C	T	0.09	7.11	2.3e-12	Promoter	NIBAN2
cg07840258	9	127507587	rs140697543	9	130340395	0.06169	C	G	0.09	7.11	2.3e-12	Promoter	NIBAN2
cg07840258	9	127507587	rs144646407	9	130340396	0.06169	C	G	0.09	7.11	2.3e-12	Promoter	NIBAN2
cg07840258	9	127507587	rs75131955	9	130340813	0.06331	A	G	0.09	7.17	1.5e-12	Promoter	NIBAN2
cg07840258	9	127507587	rs141051435	9	130340856	0.06169	A	G	0.09	7.11	2.3e-12	Promoter	NIBAN2
cg07840258	9	127507587	rs4240419	9	130341095	0.3512	C	T	0.04	6.99	5.44e-12	Promoter	NIBAN2
cg07840258	9	127507587	rs79132673	9	130345691	0.06169	T	C	0.09	7.11	2.3e-12	Intron	STXBP1
cg07840258	9	127507587	rs12551781	9	130346518	0.06548	C	T	0.08	6.82	1.63e-11	Intron	STXBP1
cg07840258	9	127507587	rs117779912	9	130348133	0.06061	T	G	0.09	6.97	6.07e-12	Intron	STXBP1
cg07840258	9	127507587	rs78654945	9	130352497	0.05898	C	T	0.09	6.96	6.66e-12	Intron	STXBP1
cg07840258	9	127507587	rs140026101	9	130355535	0.04762	C	T	0.09	6.66	4.57e-11	Intron	STXBP1
cg07840258	9	127507587	rs80191070	9	130356074	0.05952	T	C	0.08	6.85	1.39e-11	Intron	STXBP1
cg07840258	9	127507587	rs185127289	9	130358303	0.05952	A	G	0.08	6.85	1.39e-11	Intron	STXBP1
cg07840258	9	127507587	rs151008349	9	130358752	0.05898	A	G	0.08	6.54	1.02e-10	Intron	STXBP1
cg07840258	9	127507587	rs76080644	9	130360261	0.05952	A	C	0.08	6.85	1.39e-11	Intron	STXBP1
cg07840258	9	127507587	rs117922429	9	130362106	0.05952	A	G	0.08	6.85	1.39e-11	Intron	STXBP1
cg07840258	9	127507587	rs58194173	9	130362345	0.06006	A	G	0.08	6.83	1.54e-11	Intron	STXBP1
cg07840258	9	127507587	rs76651297	9	130365817	0.06223	G	A	0.08	6.45	1.81e-10	Intron	STXBP1
cg07840258	9	127507587	rs139721709	9	130365990	0.06223	T	C	0.08	6.45	1.81e-10	Intron	STXBP1
cg07840258	9	127507587	rs144986065	9	130366077	0.06223	T	G	0.08	6.45	1.81e-10	Intron	STXBP1
cg07840258	9	127507587	rs150277511	9	130368719	0.06223	A	G	0.08	6.45	1.81e-10	Intron	STXBP1
cg07840258	9	127507587	rs55651363	9	130369404	0.06656	T	C	0.07	6.01	2.64e-09	Intron	STXBP1
cg07840258	9	127507587	rs57835248	9	130369726	0.06223	C	T	0.08	6.45	1.81e-10	Intron	STXBP1
cg07840258	9	127507587	rs56108865	9	130370526	0.06656	G	C	0.07	6.01	2.64e-09	Intron	STXBP1
cg07840258	9	127507587	rs150597607	9	130373199	0.05952	G	A	0.07	5.95	3.73e-09	Promoter	STXBP1
cg17124293	10	44908533	rs149212095	10	45339414	0.02059	T	A	0.32	6.65	5.14e-11	Intron	TMEM72-AS1
cg17124293	10	44908533	rs17506449	10	45352745	0.02329	G	C	0.31	6.74	2.74e-11	Intron	TMEM72-AS1
cg17124293	10	44908533	rs34019050	10	45355054	0.02492	A	G	0.32	7.18	1.39e-12	Intron	TMEM72-AS1
cg17124293	10	44908533	rs7900859	10	45373863	0.4345	C	T	0.13	9.3	9.76e-20	Promoter	TMEM72-AS1
cg17124293	10	44908533	rs1977324	10	45374098	0.4345	C	T	0.13	9.3	9.76e-20	Promoter	TMEM72-AS1
cg17124293	10	44908533	rs3740086	10	45375296	0.3418	A	G	0.11	7.55	1.06e-13	Promoter	TMEM72-AS1
cg17124293	10	44908533	rs3740087	10	45375530	0.3418	C	T	0.11	7.55	1.06e-13	Promoter	TMEM72-AS1
cg17124293	10	44908533	rs11239271	10	45376294	0.3418	C	T	0.11	7.55	1.06e-13	Promoter	TMEM72-AS1
cg17124293	10	44908533	rs10900123	10	45376574	0.3418	T	C	0.11	7.55	1.06e-13	Promoter	TMEM72-AS1
cg17124293	10	44908533	rs914699	10	45377066	0.3418	C	A	0.11	7.55	1.06e-13	Promoter	TMEM72-AS1
cg17124293	10	44908533	rs4284362	10	45377839	0.4106	A	C	0.13	9.66	4.15e-21	Promoter	TMEM72-AS1
cg17124293	10	44908533	rs4948642	10	45378353	0.4334	C	T	0.13	9.41	3.83e-20	Promoter	TMEM72-AS1
cg17124293	10	44908533	rs4948643	10	45379759	0.4317	C	T	0.13	9.47	2.35e-20	Promoter	TMEM72-AS1
cg17124293	10	44908533	rs4948644	10	45379816	0.4317	C	A	0.13	9.47	2.35e-20	Promoter	TMEM72-AS1
cg17124293	10	44908533	rs10793562	10	45380472	0.4317	G	A	0.13	9.47	2.35e-20	Promoter	TMEM72-AS1
cg17124293	10	44908533	rs3900184	10	45381307	0.4317	A	G	0.13	9.39	4.73e-20	Promoter	TMEM72-AS1
cg17124293	10	44908533	rs7903412	10	45382361	0.4317	T	C	0.13	9.45	2.65e-20	Promoter	TMEM72-AS1
cg17124293	10	44908533	rs7082011	10	45382913	0.4317	A	G	0.13	9.45	2.65e-20	Promoter	TMEM72-AS1
cg17124293	10	44908533	rs10793563	10	45383013	0.4317	C	T	0.13	9.45	2.65e-20	Promoter	TMEM72-AS1
cg17124293	10	44908533	rs10900125	10	45383185	0.4317	G	A	0.13	9.45	2.65e-20	Promoter	TMEM72-AS1
cg17124293	10	44908533	rs11817356	10	45383503	0.2969	A	G	0.1	7.03	3.92e-12	Promoter	TMEM72-AS1
cg17124293	10	44908533	rs4948921	10	45383535	0.4323	G	A	0.13	9.46	2.41e-20	Promoter	TMEM72-AS1
cg17124293	10	44908533	rs5000415	10	45383674	0.4317	T	C	0.13	9.45	2.65e-20	Promoter	TMEM72-AS1
cg17124293	10	44908533	rs2065466	10	45384047	0.4317	C	T	0.13	9.45	2.65e-20	Intron	TMEM72-AS1
cg17124293	10	44908533	rs4506594	10	45384811	0.4317	G	A	0.13	9.45	2.65e-20	Intron	TMEM72-AS1
cg17124293	10	44908533	rs4439464	10	45384876	0.4317	G	T	0.13	9.45	2.65e-20	Intron	TMEM72-AS1
cg17124293	10	44908533	rs4948922	10	45385828	0.4307	C	A	0.13	9.45	2.73e-20	Intron	TMEM72-AS1
cg17124293	10	44908533	rs4948924	10	45386046	0.4317	C	T	0.13	9.52	1.52e-20	Intron	TMEM72-AS1
cg17124293	10	44908533	rs10900126	10	45386322	0.4312	T	G	0.13	9.52	1.53e-20	Intron	TMEM72-AS1
cg17124293	10	44908533	rs10793564	10	45386352	0.4312	A	C	0.13	9.49	1.91e-20	Intron	TMEM72-AS1
cg17124293	10	44908533	rs10793565	10	45388231	0.3397	C	G	0.11	7.72	2.97e-14	Intron	TMEM72-AS1
cg17124293	10	44908533	rs7894608	10	45388240	0.4307	C	T	0.13	9.56	1.06e-20	Intron	TMEM72-AS1
cg17124293	10	44908533	rs2026428	10	45389452	0.3397	C	T	0.11	7.72	2.97e-14	Intron	TMEM72-AS1
cg17124293	10	44908533	rs2026427	10	45389704	0.4301	C	T	0.13	9.51	1.57e-20	Intron	TMEM72-AS1
cg17124293	10	44908533	rs2183994	10	45389940	0.4307	C	T	0.13	9.56	1.06e-20	Intron	TMEM72-AS1
cg17124293	10	44908533	rs10900127	10	45390103	0.3082	A	C	0.11	7.46	2.06e-13	Intron	TMEM72-AS1
cg17124293	10	44908533	rs4948645	10	45391481	0.4355	G	A	0.13	9.51	1.54e-20	Intron	TMEM72-AS1
cg17124293	10	44908533	rs7099692	10	45391963	0.4122	C	G	0.13	9.86	7.17e-22	Intron	TMEM72-AS1
cg17124293	10	44908533	rs4948925	10	45392455	0.3467	A	G	0.11	7.72	2.95e-14	Intron	TMEM72-AS1
cg17124293	10	44908533	rs4948926	10	45392604	0.3218	C	G	0.12	8.02	3.17e-15	Intron	TMEM72-AS1
cg17124293	10	44908533	rs10900128	10	45393201	0.3451	T	G	0.11	7.66	4.72e-14	Intron	TMEM72-AS1
cg17124293	10	44908533	rs11239274	10	45393219	0.3288	T	G	0.1	7.24	9.63e-13	Intron	TMEM72-AS1
cg17124293	10	44908533	rs12777258	10	45394961	0.3451	T	C	0.11	7.66	4.72e-14	Intron	TMEM72
cg17124293	10	44908533	rs7909074	10	45395839	0.3451	A	G	0.11	7.66	4.72e-14	Exon	TMEM72
cg17124293	10	44908533	rs10751360	10	45396971	0.3451	A	G	0.11	7.66	4.72e-14	Intron	TMEM72
cg17124293	10	44908533	rs4245614	10	45397007	0.4242	T	C	0.12	9.19	2.63e-19	Intron	TMEM72
cg17124293	10	44908533	rs4948927	10	45397071	0.3451	A	G	0.11	7.66	4.72e-14	Intron	TMEM72
cg17124293	10	44908533	rs10751361	10	45398186	0.3218	A	C	0.12	8.02	3.17e-15	Intron	TMEM72
cg17124293	10	44908533	rs10900129	10	45398609	0.3299	C	G	0.11	7.34	4.82e-13	Intron	TMEM72
cg17124293	10	44908533	rs137934827	10	45398878	0.02275	G	C	0.35	7.61	6.55e-14	Intron	TMEM72
cg17124293	10	44908533	rs1408814	10	45399088	0.3451	G	A	0.11	7.66	4.72e-14	Intron	TMEM72
cg17124293	10	44908533	rs879073	10	45399882	0.4247	G	C	0.12	9.26	1.4e-19	Intron	TMEM72
cg17124293	10	44908533	rs879074	10	45400053	0.4296	A	G	0.13	9.42	3.64e-20	Intron	TMEM72
cg17124293	10	44908533	rs6593447	10	45400235	0.3467	A	G	0.11	7.71	3.16e-14	Intron	TMEM72
cg17124293	10	44908533	rs7079573	10	45400406	0.3456	A	G	0.11	7.81	1.57e-14	Intron	TMEM72
cg17124293	10	44908533	rs4481983	10	45400428	0.3456	T	G	0.11	7.81	1.57e-14	Intron	TMEM72
cg17124293	10	44908533	rs879344	10	45400667	0.429	C	G	0.13	9.38	4.95e-20	Intron	TMEM72
cg17124293	10	44908533	rs879343	10	45400707	0.429	T	G	0.13	9.38	4.95e-20	Intron	TMEM72
cg17124293	10	44908533	rs4268464	10	45401081	0.4296	A	T	0.13	9.45	2.6e-20	Intron	TMEM72
cg17124293	10	44908533	rs1332625	10	45402290	0.4301	G	A	0.13	9.43	3.36e-20	Intron	TMEM72
cg17124293	10	44908533	rs10736831	10	45402311	0.3462	A	G	0.11	7.8	1.71e-14	Intron	TMEM72
cg17124293	10	44908533	rs2281840	10	45406291	0.4393	A	G	0.13	9.51	1.6e-20	Promoter	TMEM72
cg17124293	10	44908533	rs2281841	10	45406608	0.3418	C	T	0.1	7.26	8.29e-13	Promoter	TMEM72
cg17124293	10	44908533	rs4147126	10	45407333	0.4594	T	G	0.13	9.64	5.34e-21	Promoter	TMEM72
cg17124293	10	44908533	rs7904676	10	45408011	0.4345	C	T	0.13	9.9	4.9e-22	Promoter	TMEM72
cg17124293	10	44908533	rs6593449	10	45409244	0.4204	T	C	0.15	11.54	7.43e-29	Promoter	TMEM72
cg17124293	10	44908533	rs11598392	10	45409397	0.03521	T	A	0.4	11.35	4.84e-28	Promoter	TMEM72
cg17124293	10	44908533	rs10793566	10	45411165	0.4458	C	G	0.14	11.13	4.39e-27	Intron	TMEM72
cg17124293	10	44908533	rs4948929	10	45411453	0.4464	G	C	0.14	11.02	1.25e-26	Intron	TMEM72
cg17124293	10	44908533	rs7095112	10	45411476	0.4095	C	T	0.09	6.71	3.48e-11	Intron	TMEM72
cg17124293	10	44908533	rs111687407	10	45412410	0.0325	C	A	0.39	10.46	2.94e-24	Intron	TMEM72
cg17124293	10	44908533	rs7923091	10	45412644	0.4437	C	T	0.14	10.54	1.29e-24	Intron	TMEM72
cg17124293	10	44908533	rs17417060	10	45412777	0.0325	G	A	0.39	10.46	2.94e-24	Intron	TMEM72-AS1
cg17124293	10	44908533	rs7923073	10	45412787	0.4437	G	A	0.14	10.54	1.29e-24	Intron	TMEM72-AS1
cg17124293	10	44908533	rs7100544	10	45413184	0.4437	G	A	0.14	10.54	1.29e-24	Intron	TMEM72-AS1
cg17124293	10	44908533	rs72778871	10	45413193	0.03196	A	G	0.38	10.06	1.13e-22	Intron	TMEM72-AS1
cg17124293	10	44908533	rs6593450	10	45414369	0.4447	C	T	0.14	10.47	2.69e-24	Intron	TMEM72-AS1
cg17124293	10	44908533	rs7911339	10	45414457	0.3104	C	G	0.08	5.52	4.45e-08	Intron	TMEM72-AS1
cg17124293	10	44908533	rs10793567	10	45415207	0.4442	C	T	0.14	10.48	2.39e-24	Intron	TMEM72-AS1
cg17124293	10	44908533	rs10793568	10	45415209	0.4442	G	A	0.14	10.48	2.39e-24	Intron	TMEM72-AS1
cg17124293	10	44908533	rs2065465	10	45416256	0.415	G	T	0.09	7.01	4.69e-12	Promoter	TMEM72-AS1
cg17124293	10	44908533	rs77740952	10	45417407	0.3093	T	C	-0.08	-5.56	3.56e-08	Promoter	TMEM72-AS1
cg17124293	10	44908533	rs7085840	10	45419333	0.3017	A	G	0.09	5.78	1.01e-08	Promoter	TMEM72-AS1
cg17124293	10	44908533	rs7477198	10	45419744	0.3348	T	G	0.13	9.33	7.5e-20	Promoter	TMEM72-AS1
cg17124293	10	44908533	rs1332623	10	45419998	0.3342	T	G	0.13	9.42	3.39e-20	Promoter	TMEM72-AS1
cg17124293	10	44908533	rs1332622	10	45420076	0.3077	A	G	0.09	5.85	6.84e-09	Promoter	TMEM72-AS1
cg17124293	10	44908533	rs10793569	10	45420416	0.4345	G	A	0.14	10.64	5.1e-25	Promoter	TMEM72-AS1
cg17124293	10	44908533	rs1395720736	10	45420647	0.4133	T	A	0.14	11.04	1.05e-26	Promoter	TMEM72-AS1
cg17124293	10	44908533	rs72780637	10	45421903	0.03196	A	G	0.36	9.41	3.69e-20	Intron	TMEM72-AS1
cg17124293	10	44908533	rs867317	10	45422267	0.4361	G	A	0.14	10.66	4.41e-25	Intron	TMEM72-AS1
cg17124293	10	44908533	rs10900130	10	45423160	0.3586	C	T	0.12	8.9	2.93e-18	Intron	TMEM72
cg17124293	10	44908533	rs11239281	10	45423727	0.3342	T	C	0.13	9.32	8.04e-20	Intron	TMEM72
cg17124293	10	44908533	rs914696	10	45425266	0.4133	T	G	0.14	10.88	5.06e-26	Promoter	TMEM72
cg17124293	10	44908533	rs61854007	10	45425745	0.05146	T	C	0.28	9.1	5.37e-19	Promoter	TMEM72
cg17124293	10	44908533	rs872208	10	45427052	0.1246	G	A	0.19	8.91	2.76e-18	Promoter	TMEM72
cg17124293	10	44908533	rs7078924	10	45427656	0.052	C	T	0.28	8.98	1.55e-18	Promoter	TMEM72
cg17124293	10	44908533	rs7068765	10	45427742	0.4215	T	G	0.13	10.29	1.36e-23	Promoter	TMEM72
cg17124293	10	44908533	rs11596745	10	45428342	0.052	A	G	0.28	8.98	1.55e-18	Promoter	TMEM72
cg17124293	10	44908533	rs11595747	10	45428871	0.03304	G	T	0.36	9.62	5.91e-21	Promoter	TMEM72
cg17124293	10	44908533	rs7067692	10	45430699	0.4231	G	A	0.14	10.5	1.94e-24	3' UTR	TMEM72
cg17124293	10	44908533	rs10751362	10	45431321	0.3527	A	C	0.12	8.72	1.29e-17	3' UTR	TMEM72
cg17124293	10	44908533	rs72780643	10	45431360	0.05471	C	G	0.26	8.7	1.48e-17	3' UTR	TMEM72
cg17124293	10	44908533	rs10900132	10	45431416	0.4231	A	G	0.14	10.5	1.94e-24	3' UTR	TMEM72
cg17124293	10	44908533	rs914695	10	45432259	0.4236	T	A	0.14	10.56	1.12e-24	3' UTR	TMEM72
cg17124293	10	44908533	rs2297494	10	45432386	0.052	T	C	0.28	8.98	1.55e-18	3' UTR	TMEM72
cg17124293	10	44908533	rs2297493	10	45432504	0.052	A	G	0.28	8.98	1.55e-18	Intron	TMEM72
cg17124293	10	44908533	rs3740088	10	45433145	0.052	C	A	0.28	8.98	1.55e-18	Intron	TMEM72
cg17124293	10	44908533	rs3740089	10	45433201	0.052	T	G	0.28	8.98	1.55e-18	Intron	TMEM72
cg17124293	10	44908533	rs4948933	10	45433884	0.4236	G	C	0.14	10.56	1.12e-24	Intron	TMEM72
cg17124293	10	44908533	rs4948646	10	45434719	0.4236	C	T	0.14	10.56	1.12e-24	Intron	TMEM72
cg17124293	10	44908533	rs72780645	10	45434954	0.052	C	T	0.28	8.98	1.55e-18	Intron	TMEM72
cg17124293	10	44908533	rs61854008	10	45435314	0.052	C	T	0.28	8.98	1.55e-18	Intron	TMEM72
cg17124293	10	44908533	rs11593043	10	45436296	0.052	A	G	0.28	8.98	1.55e-18	Intron	TMEM72
cg17124293	10	44908533	rs4396240	10	45438847	0.4198	C	G	0.14	10.43	3.86e-24	Intron	TMEM72
cg17124293	10	44908533	rs952956	10	45440813	0.0325	G	A	0.36	9.64	5.15e-21	Intron	TMEM72
cg17124293	10	44908533	rs11597898	10	45442303	0.05146	T	C	0.28	8.97	1.64e-18	Intron	RASSF4
cg17124293	10	44908533	rs7096289	10	45442544	0.4182	G	A	0.14	10.4	5e-24	Intron	RASSF4
cg17124293	10	44908533	rs949607	10	45443514	0.0325	C	T	0.36	9.64	5.15e-21	Intron	RASSF4
cg17124293	10	44908533	rs949608	10	45443712	0.3342	G	C	-0.08	-5.58	3.21e-08	Intron	RASSF4
cg17124293	10	44908533	rs1332628	10	45444490	0.0325	A	G	0.36	9.64	5.15e-21	Intron	RASSF4
cg17124293	10	44908533	rs1332629	10	45444502	0.1224	A	G	0.19	9.2	2.34e-19	Intron	RASSF4
cg17124293	10	44908533	rs17515726	10	45444561	0.03196	C	T	0.35	9.25	1.53e-19	Intron	RASSF4
cg17124293	10	44908533	rs11239287	10	45445277	0.0325	C	A	0.36	9.64	5.15e-21	Intron	RASSF4
cg17124293	10	44908533	rs7901437	10	45445424	0.1241	G	A	0.18	8.78	7.84e-18	Intron	RASSF4
cg17124293	10	44908533	rs10900135	10	45446791	0.1219	A	G	0.17	7.98	4.42e-15	Intron	RASSF4
cg17124293	10	44908533	rs10900136	10	45446917	0.3629	A	C	0.11	7.86	1.07e-14	Intron	RASSF4
cg17124293	10	44908533	rs2183993	10	45448327	0.2795	A	T	0.09	6.31	4.2e-10	Intron	RASSF4
cg17124293	10	44908533	rs12774533	10	45449678	0.4605	G	T	0.11	8.07	2.22e-15	Intron	RASSF4
cg17124293	10	44908533	rs11595676	10	45451364	0.273	A	G	0.09	5.86	6.6e-09	Intron	RASSF4
cg17124293	10	44908533	rs11239293	10	45451856	0.4556	G	C	0.1	7.83	1.31e-14	Promoter	RASSF4
cg17124293	10	44908533	rs11239294	10	45451924	0.4556	G	A	0.1	7.83	1.31e-14	Promoter	RASSF4
cg17124293	10	44908533	rs12777031	10	45452000	0.4556	T	A	0.1	7.83	1.31e-14	Promoter	RASSF4
cg17124293	10	44908533	rs6593452	10	45452455	0.4556	G	A	0.1	7.83	1.31e-14	Promoter	RASSF4
cg17124293	10	44908533	rs10900141	10	45452617	0.4198	G	A	0.1	7.07	3.07e-12	Promoter	RASSF4
cg17124293	10	44908533	rs4948936	10	45453169	0.4556	G	A	0.1	7.83	1.31e-14	Promoter	RASSF4
cg17124293	10	44908533	rs10900143	10	45453950	0.4556	T	C	0.1	7.83	1.31e-14	Promoter	RASSF4
cg17124293	10	44908533	rs117957541	10	45455055	0.2757	C	G	0.08	5.5	4.93e-08	Promoter	TMEM72-AS1
cg17124293	10	44908533	rs12773699	10	45455227	0.4577	T	C	0.1	7.35	4.51e-13	Promoter	RASSF4
cg17124293	10	44908533	rs7914175	10	45456863	0.416	A	C	0.08	6.23	7.03e-10	Promoter	RASSF4
cg17124293	10	44908533	rs139839493	10	45457469	0.03629	T	C	0.23	6.12	1.4e-09	Promoter	RASSF4
cg17124293	10	44908533	rs10793572	10	45459885	0.428	G	A	0.08	6.13	1.28e-09	Intron	RASSF4
cg17124293	10	44908533	rs884879	10	45461114	0.422	C	T	0.08	6.04	2.21e-09	Intron	RASSF4
cg17124293	10	44908533	rs1888983	10	45462219	0.4236	T	C	0.08	6.21	8.17e-10	Intron	RASSF4
cg17124293	10	44908533	rs3814566	10	45464035	0.4236	G	A	0.08	6.21	8.17e-10	Promoter	RASSF4
cg17124293	10	44908533	rs883733	10	45468197	0.3592	A	G	0.09	5.95	3.77e-09	Promoter	RASSF4
cg17124293	10	44908533	rs557771797	10	45470630	0.01733	C	T	0.3	5.56	3.45e-08	Intron	RASSF4
cg09299075	10	74394257	rs73278439	10	75718057	0.2443	G	T	-0.09	-6.48	1.49e-10	Distal Intergenic	C10orf55
cg09299075	10	74394257	rs7921947	10	75719228	0.2443	C	T	-0.09	-6.48	1.49e-10	Distal Intergenic	VCL
cg09299075	10	74394257	rs73278444	10	75720711	0.2443	C	A	-0.09	-6.48	1.49e-10	Distal Intergenic	VCL
cg09299075	10	74394257	rs7090106	10	75720956	0.1923	T	A	-0.1	-6.6	7.03e-11	Distal Intergenic	VCL
cg09299075	10	74394257	rs12773104	10	75722748	0.2449	G	A	-0.09	-6.53	1.11e-10	Distal Intergenic	VCL
cg09299075	10	74394257	rs10762568	10	75724150	0.2443	C	G	-0.09	-6.48	1.49e-10	Distal Intergenic	VCL
cg09299075	10	74394257	rs66804664	10	75725720	0.1923	A	G	-0.1	-6.6	7.03e-11	Distal Intergenic	VCL
cg09299075	10	74394257	rs12571531	10	75727649	0.1923	G	C	-0.1	-6.6	7.03e-11	Distal Intergenic	VCL
cg09299075	10	74394257	rs11814550	10	75730691	0.1923	T	G	-0.1	-6.6	7.03e-11	Distal Intergenic	VCL
cg09299075	10	74394257	rs6480711	10	75731506	0.2443	C	T	-0.09	-6.48	1.49e-10	Distal Intergenic	VCL
cg09299075	10	74394257	rs4746162	10	75732444	0.2784	C	T	-0.08	-5.95	3.78e-09	Distal Intergenic	VCL
cg09299075	10	74394257	rs57496258	10	75733152	0.1934	T	C	-0.09	-6.56	9.23e-11	Distal Intergenic	VCL
cg09299075	10	74394257	rs7099085	10	75735804	0.1934	T	C	-0.1	-6.68	4.22e-11	Distal Intergenic	VCL
cg09299075	10	74394257	rs11818296	10	75737455	0.1939	A	G	-0.1	-6.68	4.06e-11	Distal Intergenic	VCL
cg09299075	10	74394257	rs112593519	10	75738386	0.1945	A	G	-0.09	-6.6	6.85e-11	Distal Intergenic	VCL
cg09299075	10	74394257	rs17742846	10	75739214	0.1939	A	C	-0.1	-6.68	4.06e-11	Distal Intergenic	VCL
cg09299075	10	74394257	rs4745727	10	75741457	0.2427	G	A	-0.09	-6.6	7.15e-11	Distal Intergenic	VCL
cg09299075	10	74394257	rs7902395	10	75743526	0.1934	G	A	-0.1	-6.63	5.56e-11	Distal Intergenic	VCL
cg09299075	10	74394257	rs3955312	10	75744672	0.2449	C	T	-0.09	-6.46	1.68e-10	Distal Intergenic	VCL
cg09299075	10	74394257	rs112780600	10	75745755	0.1934	T	C	-0.1	-6.63	5.56e-11	Distal Intergenic	VCL
cg09299075	10	74394257	rs11000834	10	75747319	0.428	C	G	-0.06	-5.53	4.14e-08	Distal Intergenic	VCL
cg09299075	10	74394257	rs6480713	10	75747973	0.2449	G	T	-0.09	-6.46	1.68e-10	Distal Intergenic	VCL
cg09299075	10	74394257	rs4746163	10	75748418	0.2454	A	T	-0.09	-6.52	1.18e-10	Distal Intergenic	VCL
cg09299075	10	74394257	rs4745728	10	75748536	0.2449	G	A	-0.09	-6.46	1.68e-10	Distal Intergenic	VCL
cg09299075	10	74394257	rs4746164	10	75748708	0.1934	T	C	-0.1	-6.63	5.56e-11	Distal Intergenic	VCL
cg09299075	10	74394257	rs7914523	10	75749184	0.2449	G	A	-0.09	-6.46	1.68e-10	Distal Intergenic	VCL
cg09299075	10	74394257	rs7896842	10	75752192	0.1934	A	G	-0.1	-6.63	5.56e-11	Promoter	VCL
cg09299075	10	74394257	rs11000836	10	75752822	0.2449	G	T	-0.09	-6.46	1.68e-10	Promoter	VCL
cg09299075	10	74394257	rs112459281	10	75754056	0.1934	A	G	-0.1	-6.63	5.56e-11	Promoter	VCL
cg09299075	10	74394257	rs67672457	10	75755577	0.1923	C	G	-0.1	-6.63	5.68e-11	Promoter	VCL
cg09299075	10	74394257	rs7914216	10	75756180	0.2449	G	A	-0.09	-6.46	1.68e-10	Promoter	VCL
cg09299075	10	74394257	rs147211033	10	75756315	0.1934	A	G	-0.1	-6.63	5.56e-11	Promoter	VCL
cg09299075	10	74394257	rs3812624	10	75757580	0.2795	G	A	-0.08	-5.87	6.25e-09	Promoter	VCL
cg09299075	10	74394257	rs3812625	10	75757702	0.2454	G	A	-0.09	-6.39	2.67e-10	Promoter	VCL
cg09299075	10	74394257	rs7923778	10	75758690	0.1934	T	C	-0.1	-6.63	5.56e-11	Promoter	VCL
cg09299075	10	74394257	rs7079796	10	75759298	0.1934	T	C	-0.1	-6.63	5.56e-11	Promoter	VCL
cg09299075	10	74394257	rs12250729	10	75761860	0.2405	G	T	-0.09	-6.36	3.25e-10	Intron	VCL
cg09299075	10	74394257	rs4746165	10	75762368	0.2454	G	A	-0.09	-6.39	2.67e-10	Intron	VCL
cg09299075	10	74394257	rs11815936	10	75764623	0.2806	C	T	-0.07	-5.63	2.34e-08	Intron	VCL
cg09299075	10	74394257	rs67017494	10	75765422	0.1923	C	T	-0.09	-6.47	1.63e-10	Intron	VCL
cg09299075	10	74394257	rs2395075	10	75768180	0.2421	G	A	-0.08	-6.18	9.8e-10	Intron	VCL
cg09299075	10	74394257	rs6480714	10	75768648	0.2421	G	A	-0.08	-6.18	9.8e-10	Intron	VCL
cg09299075	10	74394257	rs1403629	10	75773362	0.2264	G	C	-0.09	-6.12	1.37e-09	Intron	VCL
cg09299075	10	74394257	rs7915720	10	75774139	0.2264	G	A	-0.09	-6.12	1.37e-09	Intron	VCL
cg09299075	10	74394257	rs12776171	10	75775234	0.2801	C	T	-0.07	-5.68	1.81e-08	Intron	VCL
cg09299075	10	74394257	rs11000847	10	75776190	0.2801	G	A	-0.07	-5.68	1.81e-08	Intron	VCL
cg09299075	10	74394257	rs11000848	10	75776571	0.2801	C	T	-0.07	-5.68	1.81e-08	Intron	VCL
cg09299075	10	74394257	rs10762571	10	75777983	0.2801	T	A	-0.07	-5.68	1.81e-08	Intron	VCL
cg09299075	10	74394257	rs4746166	10	75778687	0.1885	T	C	-0.1	-6.74	2.79e-11	Intron	VCL
cg09299075	10	74394257	rs1965491	10	75779088	0.2806	G	A	-0.07	-5.71	1.56e-08	Intron	VCL
cg09299075	10	74394257	rs11000851	10	75781960	0.247	G	T	-0.08	-6.2	8.42e-10	Intron	VCL
cg09299075	10	74394257	rs12570572	10	75782835	0.1901	G	A	-0.1	-6.98	5.82e-12	Intron	VCL
cg09299075	10	74394257	rs10824054	10	75783023	0.2595	T	C	-0.08	-6.05	2.14e-09	Intron	VCL
cg09299075	10	74394257	rs10824055	10	75784159	0.2595	A	G	-0.08	-6.05	2.14e-09	Intron	VCL
cg09299075	10	74394257	rs7069584	10	75785069	0.2595	C	T	-0.08	-6.05	2.14e-09	Intron	VCL
cg09299075	10	74394257	rs7914469	10	75786395	0.1901	A	C	-0.1	-6.98	5.82e-12	Intron	VCL
cg09299075	10	74394257	rs10824059	10	75792805	0.1901	G	A	-0.1	-6.98	5.82e-12	Intron	VCL
cg09299075	10	74394257	rs12413620	10	75793175	0.1901	C	T	-0.1	-6.98	5.82e-12	Intron	VCL
cg09299075	10	74394257	rs4745730	10	75793372	0.1928	T	C	-0.1	-6.98	5.59e-12	Intron	VCL
cg09299075	10	74394257	rs7099171	10	75793623	0.1901	T	C	-0.1	-6.98	5.82e-12	Intron	VCL
cg09299075	10	74394257	rs11814533	10	75795561	0.1901	A	G	-0.1	-6.98	5.82e-12	Intron	VCL
cg09299075	10	74394257	rs10762573	10	75798148	0.2584	C	A	-0.08	-5.99	3.05e-09	Intron	VCL
cg09299075	10	74394257	rs12782972	10	75799664	0.1901	T	C	-0.1	-6.98	5.82e-12	Intron	VCL
cg09299075	10	74394257	rs10824060	10	75800164	0.26	C	G	-0.08	-5.79	9.69e-09	Promoter	VCL
cg09299075	10	74394257	rs11594818	10	75802039	0.1901	A	G	-0.1	-6.98	5.82e-12	Promoter	VCL
cg09299075	10	74394257	rs10762574	10	75806277	0.2064	A	C	-0.1	-6.79	2.06e-11	Intron	VCL
cg09299075	10	74394257	rs3829127	10	75807365	0.1901	T	A	-0.1	-6.98	5.82e-12	Intron	VCL
cg09299075	10	74394257	rs4414157	10	75808313	0.1901	G	A	-0.1	-6.98	5.82e-12	Intron	VCL
cg09299075	10	74394257	rs11596000	10	75809794	0.1901	C	G	-0.1	-6.98	5.82e-12	Intron	VCL
cg09299075	10	74394257	rs7100021	10	75811144	0.2584	G	A	-0.08	-5.99	3.05e-09	Intron	VCL
cg09299075	10	74394257	rs10762575	10	75811243	0.2584	C	G	-0.08	-5.99	3.05e-09	Intron	VCL
cg09299075	10	74394257	rs10824063	10	75813534	0.2064	G	A	-0.1	-6.79	2.06e-11	Intron	VCL
cg09299075	10	74394257	rs4587673	10	75817018	0.1896	T	A	-0.1	-6.96	6.6e-12	Intron	VCL
cg09299075	10	74394257	rs4268450	10	75818075	0.2064	A	T	-0.1	-6.79	2.06e-11	Intron	VCL
cg09299075	10	74394257	rs56361489	10	75821613	0.208	G	A	-0.09	-6.69	3.77e-11	Intron	VCL
cg09299075	10	74394257	rs3012028	10	75828923	0.2086	A	G	-0.1	-7.17	1.53e-12	Intron	VCL
cg09299075	10	74394257	rs2131960	10	75831259	0.2237	A	C	-0.1	-7.59	7.68e-14	Intron	VCL
cg09299075	10	74394257	rs2934773	10	75836133	0.2086	T	G	-0.1	-7.17	1.53e-12	Exon	VCL
cg09299075	10	74394257	rs1908337	10	75837205	0.2232	C	T	-0.1	-7.61	6.86e-14	Exon	VCL
cg09299075	10	74394257	rs1908338	10	75839454	0.1934	G	A	-0.12	-8.15	1.14e-15	Intron	VCL
cg09299075	10	74394257	rs2131961	10	75841456	0.1918	A	G	-0.12	-8.08	2.08e-15	Intron	VCL
cg09299075	10	74394257	rs2270548	10	75842152	0.208	G	A	-0.11	-7.83	1.36e-14	Intron	VCL
cg09299075	10	74394257	rs11599181	10	75844559	0.1885	A	G	-0.12	-8.09	1.85e-15	Intron	VCL
cg09299075	10	74394257	rs12571772	10	75845885	0.1972	T	A	-0.11	-7.39	3.32e-13	Intron	VCL
cg09299075	10	74394257	rs191660137	10	75847176	0.1918	C	T	-0.12	-8.08	2.08e-15	Intron	VCL
cg09299075	10	74394257	rs11596526	10	75847804	0.1901	G	A	-0.12	-8.56	4.77e-17	Intron	VCL
cg09299075	10	74394257	rs11000869	10	75847856	0.2237	T	C	-0.12	-8.82	5.5e-18	Intron	VCL
cg09299075	10	74394257	rs7908476	10	75848464	0.1896	A	T	-0.12	-8.57	4.48e-17	Intron	VCL
cg09299075	10	74394257	rs3750862	10	75851249	0.24	A	G	-0.13	-9.66	4.21e-21	Intron	VCL
cg09299075	10	74394257	rs10824069	10	75853796	0.3554	T	C	-0.13	-11.53	8.19e-29	Intron	VCL
cg09299075	10	74394257	rs4746172	10	75855842	0.3521	T	C	-0.14	-11.95	1.08e-30	Intron	VCL
cg09299075	10	74394257	rs17743339	10	75860098	0.3781	G	A	-0.15	-13.74	3.2e-39	Intron	VCL
cg09299075	10	74394257	rs7912297	10	75861664	0.3624	A	C	-0.16	-14.47	6.46e-43	Intron	VCL
cg09299075	10	74394257	rs2270552	10	75863750	0.3272	T	C	-0.16	-13.82	1.26e-39	Promoter	VCL
cg09299075	10	74394257	rs2131959	10	75864372	0.3619	C	G	-0.16	-14.54	2.83e-43	Promoter	VCL
cg09299075	10	74394257	rs767809	10	75865065	0.2514	A	G	-0.16	-12.6	1.11e-33	Promoter	VCL
cg09299075	10	74394257	rs2131957	10	75866929	0.2514	A	C	-0.16	-12.6	1.11e-33	Promoter	VCL
cg09299075	10	74394257	rs1874151	10	75867614	0.2665	T	C	-0.16	-12.95	2.39e-35	Promoter	VCL
cg09299075	10	74394257	rs1874150	10	75867633	0.3619	C	T	-0.16	-14.54	2.83e-43	Promoter	VCL
cg09299075	10	74394257	rs3793921	10	75868114	0.3619	T	C	-0.16	-14.54	2.83e-43	Intron	VCL
cg09299075	10	74394257	rs2270551	10	75869065	0.2514	C	T	-0.16	-12.6	1.11e-33	Intron	VCL
cg09299075	10	74394257	rs12415418	10	75869938	0.2665	G	A	-0.16	-12.95	2.39e-35	Intron	VCL
cg09299075	10	74394257	rs16931177	10	75870890	0.2665	G	C	-0.16	-12.95	2.39e-35	Intron	VCL
cg09299075	10	74394257	rs2131956	10	75871735	0.3629	G	C	-0.16	-14.59	1.56e-43	3' UTR	VCL
cg09299075	10	74394257	rs34885185	10	75873165	0.2671	T	C	-0.16	-12.95	2.2e-35	Intron	VCL
cg09299075	10	74394257	rs10824071	10	75873639	0.2514	T	C	-0.16	-12.6	1.11e-33	Intron	VCL
cg09299075	10	74394257	rs10824072	10	75873892	0.2514	T	C	-0.16	-12.6	1.11e-33	Intron	VCL
cg09299075	10	74394257	rs10824073	10	75875216	0.2514	G	T	-0.16	-12.6	1.11e-33	Intron	VCL
cg09299075	10	74394257	rs6480716	10	75875794	0.2671	G	A	-0.16	-12.95	2.2e-35	Intron	VCL
cg09299075	10	74394257	rs7922894	10	75876009	0.266	T	C	-0.16	-12.96	2.07e-35	Intron	VCL
cg09299075	10	74394257	rs12572820	10	75877145	0.2514	G	C	-0.16	-12.6	1.11e-33	Intron	VCL
cg09299075	10	74394257	rs11597732	10	75877239	0.2665	G	C	-0.16	-12.95	2.39e-35	Intron	AP3M1
cg09299075	10	74394257	rs703258	10	75879511	0.3629	A	T	-0.16	-14.59	1.56e-43	3' UTR	AP3M1
cg09299075	10	74394257	rs6480717	10	75880424	0.2665	T	C	-0.16	-12.95	2.39e-35	3' UTR	AP3M1
cg09299075	10	74394257	rs6480718	10	75880754	0.3635	G	C	-0.16	-14.61	1.26e-43	3' UTR	AP3M1
cg09299075	10	74394257	rs3180427	10	75881347	0.2514	T	G	-0.16	-12.6	1.11e-33	3' UTR	AP3M1
cg09299075	10	74394257	rs6688	10	75881676	0.3629	A	G	-0.16	-14.59	1.56e-43	3' UTR	AP3M1
cg09299075	10	74394257	rs16931199	10	75884157	0.0948	T	G	-0.13	-6.44	1.97e-10	Exon	AP3M1
cg09299075	10	74394257	rs7080130	10	75884820	0.3629	C	A	-0.16	-14.59	1.56e-43	Intron	AP3M1
cg09299075	10	74394257	rs7067855	10	75884964	0.3629	C	T	-0.16	-14.59	1.56e-43	Intron	AP3M1
cg09299075	10	74394257	rs7073435	10	75886512	0.3629	C	T	-0.16	-14.59	1.56e-43	Intron	AP3M1
cg09299075	10	74394257	rs11000877	10	75887680	0.3629	G	A	-0.16	-14.59	1.56e-43	Promoter	AP3M1
cg09299075	10	74394257	rs11000878	10	75887681	0.3629	A	T	-0.16	-14.59	1.56e-43	Promoter	AP3M1
cg09299075	10	74394257	rs7099026	10	75888528	0.2514	T	C	-0.16	-12.6	1.11e-33	Promoter	AP3M1
cg09299075	10	74394257	rs11000882	10	75889903	0.2514	G	A	-0.16	-12.6	1.11e-33	Promoter	AP3M1
cg09299075	10	74394257	rs7919821	10	75892904	0.3629	G	A	-0.16	-14.59	1.56e-43	Intron	AP3M1
cg09299075	10	74394257	rs10824079	10	75893489	0.2514	C	T	-0.16	-12.6	1.11e-33	Intron	AP3M1
cg09299075	10	74394257	rs10824080	10	75893634	0.2665	A	G	-0.16	-12.95	2.39e-35	Intron	AP3M1
cg09299075	10	74394257	rs10762576	10	75896601	0.3629	C	A	-0.16	-14.59	1.56e-43	Intron	AP3M1
cg09299075	10	74394257	rs2395086	10	75898979	0.364	C	A	-0.15	-13.71	4.3e-39	Intron	AP3M1
cg09299075	10	74394257	rs7896966	10	75900462	0.3629	A	C	-0.16	-14.59	1.56e-43	Intron	AP3M1
cg09299075	10	74394257	rs10824081	10	75901662	0.3629	G	A	-0.16	-14.59	1.56e-43	Intron	AP3M1
cg09299075	10	74394257	rs11000889	10	75902177	0.2665	A	G	-0.16	-12.95	2.39e-35	Intron	AP3M1
cg09299075	10	74394257	rs1874147	10	75902658	0.2665	A	C	-0.16	-12.95	2.39e-35	Intron	AP3M1
cg09299075	10	74394257	rs6480719	10	75903081	0.3629	T	G	-0.16	-14.59	1.56e-43	Intron	AP3M1
cg09299075	10	74394257	rs17676126	10	75905198	0.2514	G	A	-0.16	-12.6	1.11e-33	Intron	AP3M1
cg09299075	10	74394257	rs3812639	10	75911680	0.2671	G	T	-0.16	-12.87	5.81e-35	Promoter	ADK
cg09299075	10	74394257	rs2894228	10	75912631	0.2671	C	T	-0.16	-12.87	5.81e-35	Promoter	ADK
cg09299075	10	74394257	rs4638254	10	75912732	0.2514	A	G	-0.16	-12.6	1.11e-33	Promoter	ADK
cg09299075	10	74394257	rs1399394647	10	75912827	0.2671	G	A	-0.16	-12.87	5.81e-35	Promoter	ADK
cg09299075	10	74394257	rs4237279	10	75913298	0.4485	A	G	-0.13	-11.74	9.48e-30	Promoter	ADK
cg09299075	10	74394257	rs10824087	10	75915890	0.2676	C	G	-0.16	-12.87	5.34e-35	Intron	ADK
cg09299075	10	74394257	rs6480721	10	75916861	0.364	A	G	-0.16	-14.54	2.99e-43	Intron	ADK
cg09299075	10	74394257	rs10762577	10	75917431	0.364	G	A	-0.16	-14.54	2.99e-43	Intron	ADK
cg09299075	10	74394257	rs7082003	10	75917833	0.364	A	T	-0.16	-14.54	2.99e-43	Intron	ADK
cg09299075	10	74394257	rs10740420	10	75919690	0.2676	A	G	-0.16	-12.87	5.34e-35	Intron	ADK
cg09299075	10	74394257	rs12569368	10	75921133	0.2676	A	G	-0.16	-12.87	5.34e-35	Intron	ADK
cg09299075	10	74394257	rs7912162	10	75921763	0.2519	G	C	-0.16	-12.6	1.04e-33	Intron	ADK
cg09299075	10	74394257	rs7894143	10	75924605	0.364	C	G	-0.16	-14.54	2.99e-43	Intron	ADK
cg09299075	10	74394257	rs35333397	10	75926191	0.2519	T	C	-0.16	-12.6	1.04e-33	Intron	ADK
cg09299075	10	74394257	rs67594352	10	75928933	0.2465	C	T	-0.16	-12.25	4.43e-32	Intron	ADK
cg09299075	10	74394257	rs10824091	10	75929508	0.2519	A	T	-0.16	-12.6	1.04e-33	Intron	ADK
cg09299075	10	74394257	rs10824092	10	75929517	0.2676	A	C	-0.16	-12.87	5.34e-35	Intron	ADK
cg09299075	10	74394257	rs7896660	10	75930157	0.2514	A	G	-0.16	-12.6	1.11e-33	Intron	ADK
cg09299075	10	74394257	rs7913178	10	75930298	0.2676	G	T	-0.16	-12.87	5.34e-35	Intron	ADK
cg09299075	10	74394257	rs2395076	10	75931839	0.2519	A	T	-0.16	-12.6	1.04e-33	Intron	ADK
cg09299075	10	74394257	rs58324700	10	75933075	0.2519	C	T	-0.16	-12.6	1.04e-33	Intron	ADK
cg09299075	10	74394257	rs71475260	10	75934399	0.2519	A	T	-0.16	-12.6	1.04e-33	Promoter	ADK
cg09299075	10	74394257	rs12414280	10	75934400	0.2519	T	C	-0.16	-12.6	1.04e-33	Promoter	ADK
cg09299075	10	74394257	rs10824094	10	75934509	0.2676	T	C	-0.16	-12.87	5.34e-35	Promoter	ADK
cg09299075	10	74394257	rs10824095	10	75936611	0.3635	T	C	-0.16	-14.65	7.74e-44	Promoter	ADK
cg09299075	10	74394257	rs7089391	10	75937520	0.2519	A	T	-0.16	-12.6	1.04e-33	Promoter	ADK
cg09299075	10	74394257	rs7093532	10	75938040	0.2519	C	T	-0.16	-12.6	1.04e-33	Promoter	ADK
cg09299075	10	74394257	rs10733895	10	75939921	0.364	T	C	-0.16	-14.54	2.99e-43	Intron	ADK
cg09299075	10	74394257	rs4745741	10	75942734	0.364	T	C	-0.16	-14.54	2.99e-43	Intron	ADK
cg09299075	10	74394257	rs11599616	10	75945733	0.2676	T	G	-0.16	-12.87	5.34e-35	Intron	ADK
cg09299075	10	74394257	rs1359966243	10	75946564	0.2676	C	T	-0.16	-12.87	5.34e-35	Intron	ADK
cg09299075	10	74394257	rs10762581	10	75948420	0.364	A	C	-0.16	-14.54	2.99e-43	Intron	ADK
cg09299075	10	74394257	rs7915999	10	75949930	0.37	T	C	-0.16	-14.81	1.07e-44	Intron	ADK
cg09299075	10	74394257	rs7097778	10	75951509	0.37	G	A	-0.16	-14.81	1.07e-44	Intron	ADK
cg09299075	10	74394257	rs7090732	10	75952903	0.37	C	T	-0.16	-14.81	1.07e-44	Intron	ADK
cg09299075	10	74394257	rs12569971	10	75954375	0.2579	C	T	-0.16	-12.88	5.21e-35	Intron	ADK
cg09299075	10	74394257	rs7087290	10	75956027	0.3927	T	C	-0.15	-14.1	4.78e-41	Intron	ADK
cg09299075	10	74394257	rs7094239	10	75959024	0.37	G	T	-0.16	-14.81	1.07e-44	Intron	ADK
cg09299075	10	74394257	rs7910153	10	75961136	0.37	G	C	-0.16	-14.81	1.07e-44	Intron	ADK
cg09299075	10	74394257	rs7895587	10	75961229	0.37	C	T	-0.16	-14.81	1.07e-44	Intron	ADK
cg09299075	10	74394257	rs10824107	10	75961799	0.2579	C	T	-0.16	-12.88	5.21e-35	Intron	ADK
cg09299075	10	74394257	rs2131955	10	75962415	0.273	A	G	-0.16	-13.24	9.18e-37	Intron	ADK
cg09299075	10	74394257	rs7909197	10	75964504	0.37	G	T	-0.16	-14.81	1.07e-44	Intron	ADK
cg09299075	10	74394257	rs10824108	10	75964734	0.2579	T	G	-0.16	-12.88	5.21e-35	Intron	ADK
cg09299075	10	74394257	rs10824109	10	75964752	0.37	C	T	-0.16	-14.81	1.07e-44	Intron	ADK
cg09299075	10	74394257	rs7896617	10	75965255	0.37	G	A	-0.16	-14.81	1.07e-44	Intron	ADK
cg09299075	10	74394257	rs12359146	10	75965672	0.2589	C	A	-0.16	-12.87	5.73e-35	Intron	ADK
cg09299075	10	74394257	rs12356967	10	75967244	0.273	C	G	-0.16	-13.24	9.18e-37	Intron	ADK
cg09299075	10	74394257	rs11000920	10	75968201	0.2579	C	T	-0.16	-12.88	5.21e-35	Intron	ADK
cg09299075	10	74394257	rs11000921	10	75968786	0.273	T	C	-0.16	-13.24	9.18e-37	Intron	ADK
cg09299075	10	74394257	rs10128407	10	75969917	0.37	G	A	-0.16	-14.81	1.07e-44	Intron	ADK
cg09299075	10	74394257	rs11599320	10	75975952	0.273	G	T	-0.16	-13.24	9.18e-37	Intron	ADK
cg09299075	10	74394257	rs11416069	10	75976512	0.37	G	A	-0.16	-14.81	1.07e-44	Intron	ADK
cg09299075	10	74394257	rs7916143	10	75978228	0.37	C	T	-0.16	-14.81	1.07e-44	Intron	ADK
cg09299075	10	74394257	rs11510969	10	75978644	0.2486	T	A	-0.16	-12.75	1.98e-34	Intron	ADK
cg09299075	10	74394257	rs10824117	10	75978660	0.3602	C	T	-0.16	-14.51	3.97e-43	Intron	ADK
cg09299075	10	74394257	rs187333189	10	75978943	0.2671	A	G	-0.14	-11.43	2.14e-28	Intron	ADK
cg09299075	10	74394257	rs199964125	10	75979363	0.06446	G	A	-0.14	-5.91	4.8e-09	Intron	ADK
cg09299075	10	74394257	rs11492360	10	75979997	0.37	C	T	-0.16	-14.81	1.07e-44	Intron	ADK
cg09299075	10	74394257	rs11000928	10	75980572	0.37	C	T	-0.16	-14.81	1.07e-44	Intron	ADK
cg09299075	10	74394257	rs201028161	10	75980622	0.3689	G	A	-0.16	-14.8	1.32e-44	Intron	ADK
cg09299075	10	74394257	rs10762585	10	75981328	0.3635	C	T	-0.16	-14.93	2.65e-45	Intron	ADK
cg09299075	10	74394257	rs10824119	10	75984006	0.37	G	C	-0.16	-14.81	1.07e-44	Intron	ADK
cg09299075	10	74394257	rs10762587	10	75984756	0.37	A	G	-0.16	-14.81	1.07e-44	Intron	ADK
cg09299075	10	74394257	rs10824120	10	75985424	0.37	A	G	-0.16	-14.81	1.07e-44	Intron	ADK
cg09299075	10	74394257	rs10762588	10	75985845	0.2492	A	G	-0.16	-12.66	5.39e-34	Intron	ADK
cg09299075	10	74394257	rs34868542	10	75986157	0.2481	T	C	-0.16	-12.75	2.1e-34	Intron	ADK
cg09299075	10	74394257	rs2395078	10	75986541	0.37	T	C	-0.16	-14.81	1.07e-44	Intron	ADK
cg09299075	10	74394257	rs11000932	10	75987352	0.2638	G	A	-0.16	-13.1	4.51e-36	Intron	ADK
cg09299075	10	74394257	rs1908333	10	75987748	0.37	A	G	-0.16	-14.81	1.07e-44	Intron	ADK
cg09299075	10	74394257	rs12770150	10	75989583	0.2638	G	C	-0.16	-13.1	4.51e-36	Intron	ADK
cg09299075	10	74394257	rs11000934	10	75989610	0.37	C	T	-0.16	-14.81	1.07e-44	Intron	ADK
cg09299075	10	74394257	rs10762589	10	75989752	0.37	T	C	-0.16	-14.81	1.07e-44	Intron	ADK
cg09299075	10	74394257	rs4564273	10	75989912	0.2486	T	C	-0.16	-12.75	1.98e-34	Intron	ADK
cg09299075	10	74394257	rs1908335	10	75991641	0.2638	A	C	-0.16	-13.1	4.51e-36	Intron	ADK
cg09299075	10	74394257	rs7914783	10	75992453	0.37	G	A	-0.16	-14.81	1.07e-44	Intron	ADK
cg09299075	10	74394257	rs12355188	10	75993245	0.2638	A	C	-0.16	-13.1	4.51e-36	Intron	ADK
cg09299075	10	74394257	rs4746191	10	75996316	0.37	T	C	-0.16	-14.81	1.07e-44	Intron	ADK
cg09299075	10	74394257	rs10824123	10	75997002	0.2633	T	C	-0.16	-13.2	1.44e-36	Intron	ADK
cg09299075	10	74394257	rs6480724	10	75997024	0.3678	G	A	-0.16	-15.04	7.25e-46	Intron	ADK
cg09299075	10	74394257	rs4451661	10	75999090	0.3678	A	G	-0.16	-15.04	7.25e-46	Intron	ADK
cg09299075	10	74394257	rs7092741	10	76001229	0.3678	C	T	-0.16	-15.04	7.25e-46	Intron	ADK
cg09299075	10	74394257	rs6480726	10	76002060	0.3678	G	T	-0.16	-15.04	7.25e-46	Intron	ADK
cg09299075	10	74394257	rs6480727	10	76003073	0.2481	T	C	-0.16	-12.86	6.31e-35	Intron	ADK
cg09299075	10	74394257	rs4323810	10	76006039	0.3678	C	T	-0.16	-15.04	7.25e-46	Intron	ADK
cg09299075	10	74394257	rs7099494	10	76006634	0.3678	T	G	-0.16	-15.04	7.25e-46	Intron	ADK
cg09299075	10	74394257	rs7895133	10	76007455	0.2481	T	A	-0.16	-12.86	6.31e-35	Intron	ADK
cg09299075	10	74394257	rs11000939	10	76013219	0.3678	C	T	-0.16	-15.04	7.25e-46	Intron	ADK
cg09299075	10	74394257	rs12360119	10	76015316	0.2481	C	G	-0.16	-12.86	6.31e-35	Intron	ADK
cg09299075	10	74394257	rs9971034	10	76016686	0.3678	T	G	-0.16	-15.04	7.25e-46	Intron	ADK
cg09299075	10	74394257	rs12243059	10	76018982	0.3678	C	T	-0.16	-15.04	7.25e-46	Intron	ADK
cg09299075	10	74394257	rs6480728	10	76020096	0.3684	T	C	-0.16	-15.04	6.94e-46	Intron	ADK
cg09299075	10	74394257	rs7086014	10	76021332	0.3732	G	A	-0.17	-15.7	2.08e-49	Intron	ADK
cg09299075	10	74394257	rs10824134	10	76021624	0.2524	C	T	-0.16	-13.12	3.39e-36	Intron	ADK
cg09299075	10	74394257	rs7919166	10	76023295	0.3689	T	G	-0.17	-16.18	5.31e-52	Intron	ADK
cg09299075	10	74394257	rs4745743	10	76023700	0.3694	C	T	-0.17	-16.18	5.01e-52	Intron	ADK
cg09299075	10	74394257	rs4489684	10	76024426	0.3694	G	C	-0.17	-16.17	5.8e-52	Intron	ADK
cg09299075	10	74394257	rs4341483	10	76024971	0.37	G	A	-0.17	-16.17	5.47e-52	Intron	ADK
cg09299075	10	74394257	rs4341484	10	76025035	0.37	G	A	-0.17	-16.17	5.47e-52	Intron	ADK
cg09299075	10	74394257	rs4341485	10	76025038	0.253	G	A	-0.16	-13.07	6.46e-36	Intron	ADK
cg09299075	10	74394257	rs6480730	10	76026245	0.344	C	G	-0.16	-15.09	3.69e-46	Intron	ADK
cg09299075	10	74394257	rs7085334	10	76027885	0.37	A	G	-0.17	-16.17	5.47e-52	Intron	ADK
cg09299075	10	74394257	rs6480731	10	76028449	0.3694	A	G	-0.17	-16.17	5.8e-52	Intron	ADK
cg09299075	10	74394257	rs4376843	10	76030088	0.3694	G	C	-0.17	-16.17	5.8e-52	Intron	ADK
cg09299075	10	74394257	rs4459229	10	76030421	0.37	A	C	-0.17	-16.17	5.47e-52	Intron	ADK
cg09299075	10	74394257	rs10740423	10	76030675	0.37	C	T	-0.17	-16.17	5.47e-52	Intron	ADK
cg09299075	10	74394257	rs10824135	10	76030679	0.37	T	C	-0.17	-16.17	5.47e-52	Intron	ADK
cg09299075	10	74394257	rs11000947	10	76031486	0.37	C	T	-0.17	-16.17	5.47e-52	Intron	ADK
cg09299075	10	74394257	rs10824136	10	76032185	0.37	C	T	-0.17	-16.17	5.47e-52	Intron	ADK
cg09299075	10	74394257	rs12571088	10	76032348	0.37	A	C	-0.17	-16.17	5.47e-52	Intron	ADK
cg09299075	10	74394257	rs10762591	10	76032360	0.37	T	A	-0.17	-16.17	5.47e-52	Intron	ADK
cg09299075	10	74394257	rs4746192	10	76032565	0.37	C	G	-0.17	-16.17	5.47e-52	Intron	ADK
cg09299075	10	74394257	rs10824137	10	76033154	0.2524	C	T	-0.16	-13.12	3.39e-36	Intron	ADK
cg09299075	10	74394257	rs11000951	10	76034090	0.37	C	T	-0.17	-16.17	5.47e-52	Intron	ADK
cg09299075	10	74394257	rs7477710	10	76035202	0.2524	C	G	-0.16	-13.12	3.39e-36	Intron	ADK
cg09299075	10	74394257	rs4501938	10	76038863	0.37	T	C	-0.17	-16.14	8.78e-52	Intron	ADK
cg09299075	10	74394257	rs12357589	10	76039631	0.37	T	G	-0.17	-16.14	8.78e-52	Intron	ADK
cg09299075	10	74394257	rs11000954	10	76040139	0.37	C	T	-0.17	-16.14	8.78e-52	Intron	ADK
cg09299075	10	74394257	rs7096664	10	76041016	0.37	G	A	-0.17	-16.14	8.78e-52	Intron	ADK
cg09299075	10	74394257	rs10824138	10	76041892	0.37	G	T	-0.17	-16.14	8.78e-52	Intron	ADK
cg09299075	10	74394257	rs6480732	10	76044624	0.37	G	C	-0.17	-16.14	8.78e-52	Intron	ADK
cg09299075	10	74394257	rs11000959	10	76046811	0.2524	G	C	-0.16	-13.2	1.49e-36	Intron	ADK
cg09299075	10	74394257	rs16931332	10	76046923	0.2389	A	G	-0.16	-12.6	1.01e-33	Intron	ADK
cg09299075	10	74394257	rs12098289	10	76047664	0.37	T	C	-0.17	-16.14	8.78e-52	Intron	ADK
cg09299075	10	74394257	rs11000960	10	76048107	0.2524	G	T	-0.16	-13.2	1.49e-36	Intron	ADK
cg09299075	10	74394257	rs7085940	10	76048878	0.37	A	C	-0.17	-16.14	8.78e-52	Intron	ADK
cg09299075	10	74394257	rs10824142	10	76050007	0.2524	G	T	-0.16	-13.2	1.49e-36	Intron	ADK
cg09299075	10	74394257	rs4639878	10	76050277	0.37	C	T	-0.17	-16.14	8.78e-52	Intron	ADK
cg09299075	10	74394257	rs4615968	10	76050594	0.37	G	A	-0.17	-16.14	8.78e-52	Intron	ADK
cg09299075	10	74394257	rs10762592	10	76051136	0.37	C	T	-0.17	-16.14	8.78e-52	Intron	ADK
cg09299075	10	74394257	rs11000964	10	76053583	0.37	C	A	-0.17	-16.14	8.78e-52	Intron	ADK
cg09299075	10	74394257	rs11000965	10	76053777	0.2524	T	G	-0.16	-13.2	1.49e-36	Intron	ADK
cg09299075	10	74394257	rs12357370	10	76056087	0.253	C	A	-0.16	-13.23	1.09e-36	Intron	ADK
cg09299075	10	74394257	rs35689397	10	76056456	0.253	A	G	-0.16	-13.23	1.09e-36	Intron	ADK
cg09299075	10	74394257	rs7900243	10	76057505	0.3705	C	T	-0.17	-16.17	5.55e-52	Intron	ADK
cg09299075	10	74394257	rs10762593	10	76057769	0.3705	G	A	-0.17	-16.17	5.55e-52	Intron	ADK
cg09299075	10	74394257	rs12776428	10	76060488	0.3705	C	T	-0.17	-16.17	5.55e-52	Intron	ADK
cg09299075	10	74394257	rs7904939	10	76060717	0.3705	G	A	-0.17	-16.17	5.55e-52	Intron	ADK
cg09299075	10	74394257	rs72818515	10	76060718	0.3705	A	C	-0.17	-16.17	5.55e-52	Intron	ADK
cg09299075	10	74394257	rs7917790	10	76063114	0.3705	A	G	-0.17	-16.17	5.55e-52	Intron	ADK
cg09299075	10	74394257	rs10824143	10	76063965	0.3705	T	C	-0.17	-16.17	5.55e-52	Intron	ADK
cg09299075	10	74394257	rs7069460	10	76064972	0.3732	G	A	-0.17	-15.53	1.78e-48	Intron	ADK
cg09299075	10	74394257	rs11000977	10	76065511	0.3759	G	T	-0.17	-16.29	1.33e-52	Intron	ADK
cg09299075	10	74394257	rs11000978	10	76066560	0.3754	T	C	-0.17	-16.3	1.15e-52	Intron	ADK
cg09299075	10	74394257	rs10824144	10	76067557	0.3754	C	A	-0.17	-16.3	1.15e-52	Intron	ADK
cg09299075	10	74394257	rs1904062	10	76069423	0.2579	T	G	-0.17	-13.35	2.82e-37	Intron	ADK
cg09299075	10	74394257	rs2894234	10	76071203	0.3754	A	G	-0.17	-16.3	1.15e-52	Intron	ADK
cg09299075	10	74394257	rs10762594	10	76071861	0.3743	A	C	-0.17	-16.25	2.14e-52	Promoter	ADK
cg09299075	10	74394257	rs11000986	10	76072635	0.2568	T	G	-0.16	-13.32	3.83e-37	Promoter	ADK
cg09299075	10	74394257	rs6480733	10	76072766	0.3738	G	T	-0.17	-16.17	5.54e-52	Promoter	ADK
cg09299075	10	74394257	rs2126765	10	76073063	0.3743	C	A	-0.17	-16.25	2.14e-52	Promoter	ADK
cg09299075	10	74394257	rs10762595	10	76076034	0.3743	A	T	-0.17	-16.25	2.14e-52	Promoter	ADK
cg09299075	10	74394257	rs958620	10	76076299	0.3743	A	G	-0.17	-16.25	2.14e-52	Promoter	ADK
cg09299075	10	74394257	rs10824147	10	76077286	0.2568	T	C	-0.16	-13.32	3.83e-37	Promoter	ADK
cg09299075	10	74394257	rs11597563	10	76078936	0.2568	A	T	-0.16	-13.32	3.83e-37	Intron	ADK
cg09299075	10	74394257	rs4746196	10	76079016	0.3743	A	G	-0.17	-16.25	2.14e-52	Intron	ADK
cg09299075	10	74394257	rs35503260	10	76079256	0.2568	T	C	-0.16	-13.32	3.83e-37	Intron	ADK
cg09299075	10	74394257	rs2169684	10	76079394	0.3743	T	C	-0.17	-16.25	2.14e-52	Intron	ADK
cg09299075	10	74394257	rs2126769	10	76079652	0.3743	T	C	-0.17	-16.25	2.14e-52	Intron	ADK
cg09299075	10	74394257	rs2078036	10	76080383	0.3743	C	T	-0.17	-16.25	2.14e-52	Intron	ADK
cg09299075	10	74394257	rs10824149	10	76081943	0.3743	T	G	-0.17	-16.25	2.14e-52	Intron	ADK
cg09299075	10	74394257	rs11000990	10	76083351	0.3738	C	T	-0.17	-16.25	2.04e-52	Intron	ADK
cg09299075	10	74394257	rs11000992	10	76083430	0.3743	G	A	-0.17	-16.25	2.14e-52	Intron	ADK
cg09299075	10	74394257	rs12354678	10	76083550	0.2584	G	T	-0.16	-13.2	1.49e-36	Intron	ADK
cg09299075	10	74394257	rs10762596	10	76084091	0.3743	A	C	-0.17	-16.25	2.14e-52	Intron	ADK
cg09299075	10	74394257	rs10824150	10	76084118	0.3743	C	A	-0.17	-16.25	2.14e-52	Intron	ADK
cg09299075	10	74394257	rs11000994	10	76084280	0.3743	C	A	-0.17	-16.25	2.14e-52	Intron	ADK
cg09299075	10	74394257	rs11000995	10	76084389	0.3743	C	G	-0.17	-16.25	2.14e-52	Intron	ADK
[truncated: 1,355 more rows]

## Sheet: Supplementary Table 7
Supplementary Table 7. The lead independent meQTL variants are associated with ESRD DMLs.
CpG	CpG_chr	CpG_position(hg19)	rsID	SNP_chr	SNP_position(hg19)	MAF	A1	A2	Beta	t-stat	P_value	Relation_to_gene	GeneSymbol_nearest_to_SNP
cg17944885	chr19	12114920	rs145118782	chr1	10941161	0.02056	T	C	-0.54	-5.59	3.07e-08	Distal Intergenic	C1orf127
cg26098679	chr1	23354515	rs2144734	chr1	23699168	0.3669	C	T	-0.11	-10.16	4.71e-23	Promoter	ZNF436-AS1
cg00829404	chr1	60897197	rs6667336	chr1	61344572	0.2359	T	C	-0.17	-13.32	3.75e-37	Intron	LOC101926964
cg11787791	chr1	153356984	rs2916193	chr1	153331849	0.3685	A	G	0.07	7.01	4.46e-12	Promoter	S100A9
cg21961721	chr1	153778854	rs141835572	chr1	153522712	0.01407	A	G	0.41	8.46	1.01e-16	Promoter	S100A4
cg11544657	chr1	9908072	rs2357582	chr1	233353472	0.01786	C	T	0.18	5.7	1.63e-08	Promoter	PCNX2
cg10256405	chr2	104757817	rs13407365	chr2	105368421	0.1364	T	G	-0.1	-9	1.25e-18	Promoter	LINC01114
cg15685198	chr2	134406265	rs4954144	chr2	135165813	0.1088	T	G	0.2	9.1	5.3e-19	Intron	TMEM163
cg24799186	chr8	102776980	rs7650366	chr3	46744966	0.3009	T	G	-0.13	-14.55	2.57e-43	Promoter	TMIE
cg16855355	chr4	184347973	rs181401980	chr4	118589501	0.01353	G	C	0.17	5.67	1.88e-08	Intron	LINC01378
cg27410726	chr6	166487293	rs2757044	chr6	167371846	0.368	C	G	0.08	6.36	3.22e-10	Promoter	RNASET2
cg04816311	chr7	1027014	rs4723380	chr7	1043819	0.2813	A	G	0.09	7.52	1.3e-13	Intron	CYP2W1
cg07514306	chr7	130294512	rs3800773	chr7	129957769	0.4151	A	G	0.1	5.66	1.98e-08	Intron	CPA4
cg24799186	chr8	102776980	rs12542846	chr8	103786630	0.2273	A	G	0.1	9.65	4.82e-21	Distal Intergenic	GASAL1
cg00435244	chr8	116113510	rs2223055	chr8	117010449	0.375	C	T	0.06	7.11	2.37e-12	Intron	TRPS1
cg00037671	chr20	4089909	rs7000180	chr8	145068062	0.1174	G	A	-0.08	-5.52	4.51e-08	Promoter	GRINA
cg07840258	chr9	127507587	rs2245051	chr9	130269786	0.3707	G	A	0.05	9.21	2.17e-19	Intron	NIBAN2
cg07840258	chr9	127507587	rs78684043	chr9	130338097	0.06006	G	C	0.09	7.13	1.99e-12	Intron	NIBAN2
cg17124293	chr10	44908533	rs6593449	chr10	45409244	0.4204	T	C	0.15	11.54	7.43e-29	Promoter	TMEM72
cg17124293	chr10	44908533	rs11598392	chr10	45409397	0.03521	T	A	0.4	11.35	4.84e-28	Promoter	TMEM72
cg09299075	chr10	74394257	rs11000978	chr10	76066560	0.3754	T	C	-0.17	-16.3	1.15e-52	Intron	ADK
cg26171235	chr10	103551934	rs12414184	chr10	105310770	0.3299	C	G	-0.09	-7.95	5.62e-15	Intron	NEURL1
cg20587151	chr11	44709425	rs4755873	chr11	44731863	0.2011	G	T	0.14	7.44	2.25e-13	Distal Intergenic	LINC02704
cg15685198	chr2	134406265	rs2606724	chr11	113957880	0.4812	A	G	0.1	6.6	6.89e-11	Intron	ZBTB16
cg15685198	chr2	134406265	rs77448543	chr11	114078762	0.2155	T	C	0.1	6.01	2.75e-09	Intron	ZBTB16
cg04591628	chr11	120230166	rs2465654	chr11	120099791	0.1359	T	C	0.07	7.56	9.46e-14	Exon	POU2F3
cg11544657	chr1	9908072	rs145401397	chr11	128548515	0.01989	A	G	0.17	5.74	1.26e-08	Intron	LOC101929538
cg11544657	chr1	9908072	rs193205309	chr12	74145641	0.01471	A	G	0.2	6.08	1.71e-09	Distal Intergenic	LINC02445
cg27373246	chr12	128852207	rs7960553	chr12	129338540	0.482	T	G	0.06	5.71	1.49e-08	Promoter	GLT1D1
cg11544657	chr1	9908072	rs144022840	chr13	28435106	0.02652	T	C	0.14	5.6	2.77e-08	Intron	PLUT
cg10072464	chr13	113410221	rs34635582	chr13	114057230	0.1418	T	C	-0.17	-7.89	8.44e-15	3' UTR	ADPRHL1
cg23024467	chr14	50888180	rs2075646	chr14	51381950	0.4491	A	T	0.09	10.62	6.1e-25	Promoter	PYGL
cg06158227	chr15	43370113	rs2412781	chr15	43667900	0.4566	C	T	0.13	8.74	1.06e-17	Promoter	TUBGCP4
cg26701500	chr20	37396211	rs72797084	chr16	76492566	0.01299	C	A	0.14	5.63	2.42e-08	Intron	CNTNAP4
cg12954441	chr16	84087613	rs884492	chr16	84122442	0.2446	A	G	0.06	5.74	1.29e-08	Promoter	MBTPS1
cg11544657	chr1	9908072	rs185572376	chr17	13800194	0.01407	G	T	0.2	5.61	2.71e-08	Intron	LOC107985014
cg16855355	chr4	184347973	rs76420370	chr17	68787219	0.02543	T	C	0.12	5.53	4.17e-08	Distal Intergenic	CASC17
cg10072464	chr13	113410221	rs384148	chr19	11878095	0.1521	G	T	0.18	8.22	6.87e-16	Promoter	ZNF441
cg00037671	chr20	4089909	rs11696682	chr20	4066947	0.2334	A	C	-0.16	-17.49	2.39e-59	Distal Intergenic	SMOX
cg04591628	chr11	120230166	rs80109907	chr21	39850955	0.09402	A	C	-0.06	-6.23	6.95e-10	Intron	ERG
cg04924454	chr7	26288179	rs80109907	chr21	39850955	0.09402	A	C	0.11	6.12	1.42e-09	Intron	ERG
cg04591628	chr11	120230166	rs2212931	chr21	39859190	0.1397	G	A	-0.05	-6	2.79e-09	Intron	ERG
cg04924454	chr7	26288179	rs2212931	chr21	39859190	0.1397	G	A	0.1	6.15	1.13e-09	Intron	ERG
We used the –cojo-slct function in GCTA, to perform conditional analysis, identifying lead independent meQTL variants for each DML

## Sheet: Supplementary Table 8
Supplementary Table 8. Enrichment of transcription factor binding sites for cis-meQTL SNPs associated with ESRD DMLs
TF1	TF-SNP	matches	Fraction	Enrichment	P_value
USF2	7723	5	0.000647417	3.49442	0.0153855
TAL1_GATA1	7799	5	0.000641108	3.46037	0.0159774
NHLH1	12332	7	0.000567629	3.06377	0.00891778
NR4A2	7321	4	0.000546373	2.94904	0.04874
Gfi1b	16668	9	0.000539957	2.91441	0.00445995
E2F4	14380	7	0.000486787	2.62743	0.0190614
TP63	27292	13	0.00047633	2.57099	0.00211913
INSM1	17275	8	0.000463097	2.49956	0.0165799
SREBF1	17427	8	0.000459058	2.47776	0.0173668
ESR1	24743	11	0.00044457	2.39956	0.00736824
Tcf3	23038	10	0.000434065	2.34286	0.0120326
NR2C2	19125	8	0.000418301	2.25777	0.0280575
Myod1	16791	7	0.00041689	2.25016	0.0390152
TFAP2A	23552	9	0.000382133	2.06256	0.033747
Klf1	40693	15	0.000368614	1.98959	0.0102667
Klf4	50628	18	0.000355534	1.91899	0.00747626
Arnt_Ahr	75959	27	0.000355455	1.91856	0.0012309
EGR1	70916	21	0.000296125	1.59833	0.0262089
SP1	98565	29	0.000294222	1.58806	0.0111563
SP2	111891	32	0.000285993	1.54364	0.0115941
Zfx	84770	24	0.000283119	1.52813	0.0290378
1.The enriched transcription factors (TFs) is determined by an fold enrichment > 1.5 with P-value < 0.05. Enrichment analyses for TFs motifs were performed by tool "snp2tfbs" . The significant enrichment results were obtained from hypergeometric test.

## Sheet: Supplementary Table 9
Supplementary Table 9. Eleven ESRD-associated CpG sites shared by primary kidney diseases are also significantly linked to eGFRcrea in previous EWAS conducted in individuals with early-stage kidney disease
CpG	CHR	Position(hg19)	Nearest gene	CpG methylation effect on gene expression(eQTM) 1	Gene expressions regulated by enhancers harboring adjacent ESRD DMLs 2	Colocalized_genes 3	ESRD in GDPH ( eGFR mean value <15 mL/min per 1.73 m2) (primary kidney disease: DKD, LN, IgAN, PKD, HKD)				eGFRcrea ( eGFR mean value: 80 - 91 mL/min per 1.73 m2)
							esitmate	P value	direction		estimate	P value	PMID	eGFR: mL/min per 1.73 m2 (mean±sd)
cg00829404	1	61362869	-	-	-	-	2.71, 2.78, 3, 3.32, 3.95	1.96e-08, 3.65e-05, 1.62e-09, 1.14e-08, 4.13e-08	+, +, +, +, +		-2.69636	2.47e-05	37188670	80.6 ± 25.0
cg04816311	7	1066650	C7orf50	-	C7orf50, COX19, GET4, MIR339, RP11-449P15.2	ADAP1, C7orf50, COX19, DNAAF5, GPR146, ZFAND2A, ZFAND2A-DT	-2.53, -4.32, -4.43, -4.6, -4.35	1.08e-06, 3.67e-07, 6.25e-11, 6.92e-10, 4.83e-07	-, -, -, -, -		4.23	2.88e-08	37188670	80.6 ± 25.0
cg06158227	15	43662311	TUBGCP4, ZSCAN29	-	TUBGCP4, ZSCAN29	LCMT2, MAP1A, MAPDA, MFAP1, PDIA3, SERF2, STRC, TMEM62, TUBGCP4, UBR1, ZSCAN29	1.47, 3.81, 2.59, 3.31, 3.73	2.71e-05, 2.63e-07, 5.26e-08, 7.36e-10, 3.9e-08	+, +, +, +, +		-0.0001082	8.736e-20	34887417	discovery cohorts:87.4 ± 19.4 replication cohorts:91.2 ± 20.3
cg09299075	10	76154015	ADK	-	-	ADK, NDST2, VCL	2.33, 2.25, 3.05, 3.77, 4.01	3.41e-06, 0.00068, 4.1e-09, 4.25e-10, 1.61e-08	+, +, +, +, +		-2.85349	7.8e-06	37188670	80.6 ± 25.0
cg10072464	13	114064536	-	DLEU7	LOC101928841	GRTP1, LAMP1	1.51, 1.91, 2.53, 2.57, 2.6	2.71e-05, 0.000677, 2.46e-09, 9.84e-08, 3e-06	+, +, +, +, +		-2.26582	3.29e-05	37188670	80.6 ± 25.0
cg11544657	1	9968130	CTNNBIP1	DLEU7, HAL, ITLN1	-	-	3.79, 3.31, 4.73, 5.41, 6.48	1.27e-07, 0.000183, 1.78e-10, 7.19e-10, 2.82e-09	+, +, +, +, +		-4.43	8.61e-09	37188670	80.6 ± 25.0
cg11787791	1	153329460	S100A9	S100A12	S100A12, S100A8, S100A9	S100A12, S100A8, S100A9	3.22, 3.1, 4.16, 4.07, 3.22	4.07e-08, 0.000185, 1.15e-10, 4.07e-09, 1.81e-05	+, +, +, +, +		-2.54608	1.33e-05	37188670	80.6 ± 25.0
cg17944885	19	12225735	-	CTD-2006C1.2, LRRC37B, ZNF136, ZNF439, ZNF44, ZNF69, ZNF788, ZNF788P, ZNF844	-	-	1.72, 2, 1.82, 2.39, 2.77	2.66e-15, 5.12e-09, 6.19e-15, 6.08e-14, 5.29e-11	+, +, +, +, +		-0.0001748	8.742e-41	34887417	discovery cohorts:87.4 ± 19.4 replication cohorts:91.2 ± 20.3
											-5.156	1.40502e-20	37188670	80.6 ± 25.0
cg22386583	17	78753756	RPTOR	AFF3, DLEU7, SP140	-	-	2.95, 4.24, 4.95, 4.6, 4.8	7.94e-06, 1.59e-05, 1.56e-10, 9.19e-09, 1.22e-06	+, +, +, +, +		-3.88	7.39e-06	37188670	80.6 ± 25.0
1.Evidence from published blood eQTM data (Bonder et al 2017, Kennedy et.al 2018 and Keshawarz et.al 2023)
2.Genes expression regulated by DML-containing active enhancers in bood. The genes were annotated using genomic imformation from enhancer-gene linkage (ABC Map and Epimap datasets), 3D chromatin interaction (Promoter capture Hi-C) and single-cell map of accessible chromatin regions.
3. Genes whose cis-eQTLs(cis-eQTLs, distance <1MB) occur at the same genomic location as a long range cis-meQTL or cis-meQTL. Cis-mQTLs were calculated from our dataset. The cis-eQTLs were identified from the eQTLGen dataset. The posterior probability of colocalization between DML and gene (Coloc.PP.H3 or Coloc.PP.H4) greater than 0.8 was considered.

## Sheet: Supplementary Table 10
Supplementary Table 10. Colocalization of long-range cis-mQTLs and cis-mQTLs of ESRD DMLs with kidney function traits GWAS (Coloc.PP.H3 or Coloc.PP.H4 ＞0.6)
SNP	SNP_Chr	SNP_Position (hg19)	MAF	CpG	CpG_Chr	CpG_Position (hg19)	Nearest Gene	Beta_meQTL	P value_meQTL	Beta_GWAS	P value_GWAS	Coloc.PP.H3	Coloc.PP.H4	Kidney function trait
rs2223055	8	117010449	0.375	cg00435244	8	117125735	LINC00536	0.0568974	2.36585e-12	0.01645	3.21e-11	0.999955	8.22539e-08	BUN
rs4723380	7	1043819	0.2813	cg04816311	7	1066650	C7orf50	0.090932	1.29915e-13	-0.05549	2.5e-94	1	8.41486e-09	BUN
rs4954144	2	135165813	0.1088	cg15685198	2	135163836	MGAT5	0.202992	5.30376e-19	0.01594	7.28e-08	0.877021	0.000983518	BUN
rs6667336	1	61344572	0.2359	cg00829404	1	61362869		-0.170388	3.74951e-37	0.0271909	2.32113e-13	1	5.01443e-10	eGFRcys-crea
rs4723380	7	1043819	0.2813	cg04816311	7	1066650	C7orf50	0.090932	1.29915e-13	-0.0563868	1.1695e-133	1	8.62765e-09	eGFRcys-crea
rs3800773	7	129957769	0.4151	cg07514306	7	129934352	CPA4	0.0953837	1.98433e-08	0.01892	2.47571e-19	0.998352	0.000294186	eGFRcys-crea
rs2245051	9	130269786	0.3707	cg07840258	9	130269866	FAM129B	0.0543893	2.16667e-19	0.022012	2.14487e-12	0.999999	1.82065e-09	eGFRcys-crea
rs2412781	15	43667900	0.4566	cg06158227	15	43662311	TUBGCP4;ZSCAN29	0.134008	1.06126e-17	0.0146075	1.23794e-10	0.642606	0.357334	eGFRcys-crea
rs78684043	9	130338097	0.06006	cg07840258	9	130269866	FAM129B	0.08764	1.99116e-12	0.022012	2.14487e-12	0.999999	1.82059e-09	eGFRcys-crea
rs11000978	10	76066560	0.3754	cg09299075	10	76154015	ADK	-0.172462	1.15333e-52	0.0183389	2.21157e-18	0.998164	0.00183609	eGFRcys-crea
rs12414184	10	105310770	0.3299	cg26171235	10	105311691	NEURL1	-0.0881045	5.61975e-15	-0.0175737	1.49142e-12	0.999999	2.39276e-09	eGFRcys-crea
Long-range cis-mQTLs and cis-mQTLs were identified from our dataset. These mQTLs are presented as rsID and corresponding CpG ID, along with their nearest genes. The effect size estimates (meQTL Beta) and associated P values (meQTL P value) reflect the strength and significance of the associations between SNPs and DMLs. Colocalization analyses were performed using eGFRcys-crea GWAS data from Gabri…

[truncated: 7 more sheets: Supplementary Table 11, Supplementary Table 12, Supplementary Table 13, Supplementary Table 14, Supplementary Table 15, Supplementary Table 16, Supplementary Table 17]
